# Supplementary material
Source: PubMed Central journal article supplement (PMC7159291)
Supplement: mmc1.pdf [file mmc1.pdf]

# THE LANCET

## Supplementary appendix

This appendix formed part of the original submission and has been peer reviewed. We post it as supplied by the authors.

Supplement to: Liu P, Guo Y, Qian X, et al. China's distinctive engagement in global health. *Lancet* 2014; **384**: 793–804.

### Web appendix: Data sources

To support the arguments in this article, we collected data from 529 distinct sources, including 425 pieces from various websites, 70 pieces from statistical yearbooks, 23 pieces from annual or seasonal reports and 15 pieces from newspapers or personal interviews. The data sources are from 15 central government departments, including 227 from the Ministry of Commerce of the People's Republic of China (PRC), 35 pieces from the National Health and Family Planning Commission of the PRC, 15 pieces from the Ministry of Education of the PRC, 10 pieces from China Customs etc. Both the English and the Chinese sources are covered in the paper, including 24 English sources and 505 Chinese sources. Detailed information is shown below:

| Source                                                                                                                                                                                          | Topic                                      | Sub-topic            | Category            | Organization                     | Information title                                                                     |
|-------------------------------------------------------------------------------------------------------------------------------------------------------------------------------------------------|--------------------------------------------|----------------------|---------------------|----------------------------------|---------------------------------------------------------------------------------------|
| <a href="http://www.moe.gov.cn/publicfiles/business/htmlfiles/moe/moe_850/201303/xxgk_149249.html">http://www.moe.gov.cn/publicfiles/business/htmlfiles/moe/moe_850/201303/xxgk_149249.html</a> | Capacity building and knowledge production | Medical universities | Web-info            | Ministry of Education of the PRC | The college enrolment notice for foreign medical students on clinical medical science |
| 1999 Brief Statistics of International Students in China                                                                                                                                        | Capacity building and knowledge production | Medical universities | Yearbook statistics | Ministry of Education of the PRC | International Students in China by Region, 1998                                       |
| 2000 Brief Statistics of International Students in China                                                                                                                                        | Capacity building and knowledge production | Medical universities | Yearbook statistics | Ministry of Education of the PRC | International Students in China by Region, 1999                                       |
| 2001 Brief Statistics of International Students in China                                                                                                                                        | Capacity building and knowledge production | Medical universities | Yearbook statistics | Ministry of Education of the PRC | International Students in China by Region, 2000                                       |
| 2002 Brief Statistics of International Students in China                                                                                                                                        | Capacity building and knowledge production | Medical universities | Yearbook statistics | Ministry of Education of the PRC | International Students in China by Region, 2001                                       |
| 2003 Brief Statistics of International Students in China                                                                                                                                        | Capacity building and knowledge production | Medical universities | Yearbook statistics | Ministry of Education of the PRC | International Students in China by Region, 2002                                       |

| <b>Source</b>                                                                                                                                                                                                                     | <b>Topic</b>                               | <b>Sub-topic</b>     | <b>Category</b>     | <b>Organization</b>              | <b>Information title</b>                        |
|-----------------------------------------------------------------------------------------------------------------------------------------------------------------------------------------------------------------------------------|--------------------------------------------|----------------------|---------------------|----------------------------------|-------------------------------------------------|
| 2004 Brief Statistics of International Students in China                                                                                                                                                                          | Capacity building and knowledge production | Medical universities | Yearbook statistics | Ministry of Education of the PRC | International Students in China by Region, 2003 |
| 2005 Brief Statistics of International Students in China                                                                                                                                                                          | Capacity building and knowledge production | Medical universities | Yearbook statistics | Ministry of Education of the PRC | International Students in China by Region, 2004 |
| 2006 Brief Statistics of International Students in China                                                                                                                                                                          | Capacity building and knowledge production | Medical universities | Yearbook statistics | Ministry of Education of the PRC | International Students in China by Region, 2005 |
| 2007 Brief Statistics of International Students in China                                                                                                                                                                          | Capacity building and knowledge production | Medical universities | Yearbook statistics | Ministry of Education of the PRC | International Students in China by Region, 2006 |
| 2008 Brief Statistics of International Students in China                                                                                                                                                                          | Capacity building and knowledge production | Medical universities | Yearbook statistics | Ministry of Education of the PRC | International Students in China by Region, 2007 |
| 2009 Brief Statistics of International Students in China                                                                                                                                                                          | Capacity building and knowledge production | Medical universities | Yearbook statistics | Ministry of Education of the PRC | International Students in China by Region, 2008 |
| 2010 Brief Statistics of International Students in China                                                                                                                                                                          | Capacity building and knowledge production | Medical universities | Yearbook statistics | Ministry of Education of the PRC | International Students in China by Region, 2009 |
| 2011 Brief Statistics of International Students in China                                                                                                                                                                          | Capacity building and knowledge production | Medical universities | Yearbook statistics | Ministry of Education of the PRC | International Students in China by Region, 2010 |
| <a href="http://www.studyinchina.edu.cn/do_cinfo/board/boarddetail.jsp?columnId=00901&amp;parentColumnId=009&amp;i">http://www.studyinchina.edu.cn/do_cinfo/board/boarddetail.jsp?columnId=00901&amp;parentColumnId=009&amp;i</a> | Capacity building and knowledge production | Medical universities | Yearbook statistics | Ministry of Education of the PRC | China Education Yearbook 2012                   |

| Source                                                    | Topic                                      | Sub-topic | Category            | Organization                                  | Information title                                                                                                                                                                                                                                                           |
|-----------------------------------------------------------|--------------------------------------------|-----------|---------------------|-----------------------------------------------|-----------------------------------------------------------------------------------------------------------------------------------------------------------------------------------------------------------------------------------------------------------------------------|
| temSeq=4510                                               |                                            |           |                     |                                               |                                                                                                                                                                                                                                                                             |
| 2003 China statistical yearbook on science and technology | Capacity building and knowledge production | R&D       | Yearbook statistics | Ministry of Science and Technology of the PRC | China statistical yearbook on science and technology 2002: Intramural Expenditure on R&D in Large and Medium-sized Industrial Enterprises by Industrial Sector, Intramural Expenditure on R&D of R&D Institutions by Industrial Sector in which the R&D Institutions Served |
| 2004 China statistical yearbook on science and technology | Capacity building and knowledge production | R&D       | Yearbook statistics | Ministry of Science and Technology of the PRC | China statistical yearbook on science and technology 2003: Intramural Expenditure on R&D in Large and Medium-sized Industrial Enterprises by Industrial Sector, Intramural Expenditure on R&D of R&D Institutions by Industrial Sector in which the R&D Institutions Served |
| 2005 China statistical yearbook on science and technology | Capacity building and knowledge production | R&D       | Yearbook statistics | Ministry of Science and Technology of the PRC | China statistical yearbook on science and technology 2004: Intramural Expenditure on R&D in Large and Medium-sized Industrial Enterprises by Industrial Sector, Intramural Expenditure on R&D of R&D Institutions by Industrial Sector in which the R&D Institutions Served |
| 2006 China statistical yearbook on science and technology | Capacity building and knowledge production | R&D       | Yearbook statistics | Ministry of Science and Technology of the PRC | China statistical yearbook on science and technology 2005: Intramural Expenditure on R&D in Large and Medium-sized Industrial Enterprises by Industrial Sector, Intramural Expenditure on R&D of R&D                                                                        |

| Source                                                    | Topic                                      | Sub-topic | Category            | Organization                                  | Information title                                                                                                                                                                                                                                                           |
|-----------------------------------------------------------|--------------------------------------------|-----------|---------------------|-----------------------------------------------|-----------------------------------------------------------------------------------------------------------------------------------------------------------------------------------------------------------------------------------------------------------------------------|
|                                                           |                                            |           |                     |                                               | Institutions by Industrial Sector in which the R&D Institutions Served                                                                                                                                                                                                      |
| 2007 China statistical yearbook on science and technology | Capacity building and knowledge production | R&D       | Yearbook statistics | Ministry of Science and Technology of the PRC | China statistical yearbook on science and technology 2006: Intramural Expenditure on R&D in Large and Medium-sized Industrial Enterprises by Industrial Sector, Intramural Expenditure on R&D of R&D Institutions by Industrial Sector in which the R&D Institutions Served |
| 2008 China statistical yearbook on science and technology | Capacity building and knowledge production | R&D       | Yearbook statistics | Ministry of Science and Technology of the PRC | China statistical yearbook on science and technology 2007: Intramural Expenditure on R&D in Large and Medium-sized Industrial Enterprises by Industrial Sector, Intramural Expenditure on R&D of R&D Institutions by Industrial Sector in which the R&D Institutions Served |
| 2009 China statistical yearbook on science and technology | Capacity building and knowledge production | R&D       | Yearbook statistics | Ministry of Science and Technology of the PRC | China statistical yearbook on science and technology 2008: Intramural Expenditure on R&D in Large and Medium-sized Industrial Enterprises by Industrial Sector, Intramural Expenditure on R&D of R&D Institutions by Industrial Sector in which the R&D Institutions Served |
| 2010 China statistical yearbook on science and technology | Capacity building and knowledge production | R&D       | Yearbook statistics | Ministry of Science and Technology of the PRC | China statistical yearbook on science and technology 2009: Intramural Expenditure on R&D in Large and Medium-sized Industrial Enterprises by Industrial Sector, Intramural Expenditure on R&D of R&D                                                                        |

| Source                                                                                                                                                                      | Topic                                      | Sub-topic           | Category            | Organization                                  | Information title                                                                                                                                                                                                                                                           |
|-----------------------------------------------------------------------------------------------------------------------------------------------------------------------------|--------------------------------------------|---------------------|---------------------|-----------------------------------------------|-----------------------------------------------------------------------------------------------------------------------------------------------------------------------------------------------------------------------------------------------------------------------------|
|                                                                                                                                                                             |                                            |                     |                     |                                               | Institutions by Industrial Sector in which the R&D Institutions Served                                                                                                                                                                                                      |
| 2011 China statistical yearbook on science and technology                                                                                                                   | Capacity building and knowledge production | R&D                 | Yearbook statistics | Ministry of Science and Technology of the PRC | China statistical yearbook on science and technology 2010: Intramural Expenditure on R&D in Large and Medium-sized Industrial Enterprises by Industrial Sector, Intramural Expenditure on R&D of R&D Institutions by Industrial Sector in which the R&D Institutions Served |
| 2012 China statistical yearbook on science and technology                                                                                                                   | Capacity building and knowledge production | R&D                 | Yearbook statistics | Ministry of Science and Technology of the PRC | China statistical yearbook on science and technology 2011: Intramural Expenditure on R&D in Large and Medium-sized Industrial Enterprises by Industrial Sector, Intramural Expenditure on R&D of R&D Institutions by Industrial Sector in which the R&D Institutions Served |
| <a href="http://wcm.fmprc.gov.cn/pub/chn/gxh/cgb/gj/fz/1206_17/1206x2/t525730.htm">http://wcm.fmprc.gov.cn/pub/chn/gxh/cgb/gj/fz/1206_17/1206x2/t525730.htm</a>             | Development assistance for health          | Anti-malaria center | Web-Info            | Ministry of Foreign Affairs of the PRC        | The Chinese Ambassador to Guinea-Bissau, Yan Banghua, attended the opening and handover ceremony of malaria prevention and treatment centers funded by China                                                                                                                |
| <a href="http://jjhzj.mofcom.gov.cn/aarticle/y/200908/20090806472797.html">http://jjhzj.mofcom.gov.cn/aarticle/y/200908/20090806472797.html</a>                             | Development assistance for health          | Anti-malaria center | Web-Info            | Ministry of Commerce of the PRC               | The project work of China funded Ethiopia Malaria Control Center for this year was completed                                                                                                                                                                                |
| <a href="http://jjhzj.mofcom.gov.cn/article/ldhd/shaanxi/bx/200904/20090406161531.shtml">http://jjhzj.mofcom.gov.cn/article/ldhd/shaanxi/bx/200904/20090406161531.shtml</a> | Development assistance for health          | Anti-malaria center | Web-Info            | Ministry of Commerce of the PRC               | The opening ceremony of China funded malaria prevention and treatment centers was held in Cameroon                                                                                                                                                                          |

| <b>Source</b>                                                                                                                                                   | <b>Topic</b>                      | <b>Sub-topic</b>    | <b>Category</b> | <b>Organization</b>             | <b>Information title</b>                                                                                                                                                          |
|-----------------------------------------------------------------------------------------------------------------------------------------------------------------|-----------------------------------|---------------------|-----------------|---------------------------------|-----------------------------------------------------------------------------------------------------------------------------------------------------------------------------------|
| <a href="http://jjhzj.mofcom.gov.cn/aarticle/tpxw/200907/20090706379377.html">http://jjhzj.mofcom.gov.cn/aarticle/tpxw/200907/20090706379377.html</a>           | Development assistance for health | Anti-malaria center | Web-Info        | Ministry of Commerce of the PRC | The opening ceremony of China funded Zambia Malaria Control Center was held                                                                                                       |
| <a href="http://www.mofcom.gov.cn/aarticle/i/jyjlk/200911/20091106605687.html">http://www.mofcom.gov.cn/aarticle/i/jyjlk/200911/20091106605687.html</a>         | Development assistance for health | Anti-malaria center | Web-Info        | Ministry of Commerce of the PRC | The opening ceremony of China - Guinea Malaria Control Center was held                                                                                                            |
| <a href="http://lr.china-embassy.org/chn/sghdhzxxx/t615922.htm">http://lr.china-embassy.org/chn/sghdhzxxx/t615922.htm</a>                                       | Development assistance for health | Anti-malaria center | Web-Info        | Overseas Embassy                | The implementation condition of the eight measures, discussed on the China-Africa Cooperation Forum (Beijing Summit) to help with Africa' development, in the Republic of Liberia |
| <a href="http://sd.mofcom.gov.cn/aarticle/to/dayheader/200910/20091006572441.html">http://sd.mofcom.gov.cn/aarticle/to/dayheader/200910/20091006572441.html</a> | Development assistance for health | Anti-malaria center | Web-Info        | Overseas Embassy                | The opening ceremony of China - Sudan Malaria Control Center was held                                                                                                             |
| <a href="http://xyf.mofcom.gov.cn/aarticle/c/ksm/200912/20091206644451.html">http://xyf.mofcom.gov.cn/aarticle/c/ksm/200912/20091206644451.html</a>             | Development assistance for health | Anti-malaria center | Web-Info        | Overseas Embassy                | The opening and handover ceremony of China funded antimalarial Center was held in Mozambique                                                                                      |
| <a href="http://ug.mofcom.gov.cn/aarticle/jmxw/200805/20080505537035.html">http://ug.mofcom.gov.cn/aarticle/jmxw/200805/20080505537035.html</a>                 | Development assistance for health | Anti-malaria center | Web-Info        | Overseas Embassy                | The opening ceremony of China funded Uganda Malaria Control Center was held and the handover certificate was signed                                                               |
| <a href="http://xyf.mofcom.gov.cn/aarticle/c/ksm/200912/20091206649158.html">http://xyf.mofcom.gov.cn/aarticle/c/ksm/200912/20091206649158.html</a>             | Development assistance for health | Anti-malaria center | Web-Info        | Overseas Embassy                | The opening ceremony of China funded malaria prevention and treatment centers was held in Tanzania                                                                                |
| <a href="http://sl.mofcom.gov.cn/aarticle/jmxw/200911/20091106598576.html">http://sl.mofcom.gov.cn/aarticle/jmxw/200911/20091106598576.html</a>                 | Development assistance for health | Anti-malaria center | Web-Info        | Overseas Embassy                | The opening ceremony of China - Sierra Leone Malaria Prevention and Treatment Center was held in Freetown                                                                         |

| <b>Source</b>                                                                                                                                                   | <b>Topic</b>                      | <b>Sub-topic</b>    | <b>Category</b> | <b>Organization</b> | <b>Information title</b>                                                                                                                             |
|-----------------------------------------------------------------------------------------------------------------------------------------------------------------|-----------------------------------|---------------------|-----------------|---------------------|------------------------------------------------------------------------------------------------------------------------------------------------------|
| <a href="http://mg.mofcom.gov.cn/article/to/dayheader/200910/20091006545035.shtml">http://mg.mofcom.gov.cn/article/to/dayheader/200910/20091006545035.shtml</a> | Development assistance for health | Anti-malaria center | Web-Info        | Overseas Embassy    | The opening ceremony of China funded Zambia Malaria Control Center was held in Madagascar                                                            |
| <a href="http://ao.mofcom.gov.cn/aarticle/to/dayheader/200910/20091006578043.html">http://ao.mofcom.gov.cn/aarticle/to/dayheader/200910/20091006578043.html</a> | Development assistance for health | Anti-malaria center | Web-Info        | Overseas Embassy    | The opening ceremony of China funded Angola malaria prevention and treatment centers was held in Luanda                                              |
| <a href="http://bi.mofcom.gov.cn/article/jmxw/200803/20080305450744.shtml">http://bi.mofcom.gov.cn/article/jmxw/200803/20080305450744.shtml</a>                 | Development assistance for health | Anti-malaria center | Web-Info        | Overseas Embassy    | The opening ceremony of China - Burundi Malaria Control Center was held                                                                              |
| <a href="http://cg.mofcom.gov.cn/article/jmxw/200808/20080805724852.shtml">http://cg.mofcom.gov.cn/article/jmxw/200808/20080805724852.shtml</a>                 | Development assistance for health | Anti-malaria center | Web-Info        | Overseas Embassy    | The Chinese Ambassador to Congo (Brazzaville), Li, attended the opening ceremony of anti-malaria center                                              |
| <a href="http://gq.mofcom.gov.cn/aarticle/jmxw/200906/20090606327958.html">http://gq.mofcom.gov.cn/aarticle/jmxw/200906/20090606327958.html</a>                 | Development assistance for health | Anti-malaria center | Web-Info        | Overseas Embassy    | The handover ceremony of the Equatorial Guinea Malaria Control Center funded by China was held in Bata                                               |
| <a href="http://ne.mofcom.gov.cn/article/to/dayheader/201301/20130100011823.shtml">http://ne.mofcom.gov.cn/article/to/dayheader/201301/20130100011823.shtml</a> | Development assistance for health | Anti-malaria center | Web-Info        | Overseas Embassy    | The opening ceremony of China funded antimalarial center was held in Niger on December 13, 2012                                                      |
| <a href="http://bj.mofcom.gov.cn/aarticle/ddfg/200811/20081105883291.html">http://bj.mofcom.gov.cn/aarticle/ddfg/200811/20081105883291.html</a>                 | Development assistance for health | Anti-malaria center | Web-Info        | Overseas Embassy    | Ambassador Geng Wenbing attended the opening ceremony of China funded malaria center in Benin                                                        |
| <a href="http://tg.mofcom.gov.cn/aarticle/jmxw/200901/20090105994551.html">http://tg.mofcom.gov.cn/aarticle/jmxw/200901/20090105994551.html</a>                 | Development assistance for health | Anti-malaria center | Web-Info        | Overseas Embassy    | The opening ceremony of China-Togo Malaria Control Center was held                                                                                   |
| <a href="http://gh.mofcom.gov.cn/aarticle/slfw/200910/20091006584993.html">http://gh.mofcom.gov.cn/aarticle/slfw/200910/20091006584993.html</a>                 | Development assistance for health | Anti-malaria center | Web-Info        | Overseas Embassy    | The opening ceremony of malaria prevention and treatment centers and medical equipment handover ceremony were held at the teaching hospital in Ghana |
| <a href="http://ci.mofcom.gov.cn/aarticle/wb/200904/20090406164439.html">http://ci.mofcom.gov.cn/aarticle/wb/200904/20090406164439.html</a>                     | Development assistance for health | Anti-malaria center | Web-Info        | Overseas Embassy    | The opening ceremony of China - Cote d'Ivoire Malaria Control Center was held                                                                        |



| Source                                                                                                                                                                      | Topic                             | Sub-topic           | Category | Organization                  | Information title                                                                                                                                  |
|-----------------------------------------------------------------------------------------------------------------------------------------------------------------------------|-----------------------------------|---------------------|----------|-------------------------------|----------------------------------------------------------------------------------------------------------------------------------------------------|
| <a href="http://cf.mofcom.gov.cn/aarticle/jmxw/200911/20091106594425.html">http://cf.mofcom.gov.cn/aarticle/jmxw/200911/20091106594425.html</a>                             | Development assistance for health | Anti-malaria center | Web-Info | Overseas Embassy              | The opening ceremony of Central Africa malaria control center was held                                                                             |
| <a href="http://tchad.mofcom.gov.cn/aarticle/jmxw/200801/20080105321467.html">http://tchad.mofcom.gov.cn/aarticle/jmxw/200801/20080105321467.html</a>                       | Development assistance for health | Anti-malaria center | Web-Info | Overseas Embassy              | The opening ceremony of China - Chad Malaria Control Center was held                                                                               |
| <a href="http://ml.mofcom.gov.cn/article/jmxw/200903/20090306079108.shtml">http://ml.mofcom.gov.cn/article/jmxw/200903/20090306079108.shtml</a>                             | Development assistance for health | Anti-malaria center | Web-Info | Overseas Embassy              | China - Mali anti-malaria center opened and held its first training course                                                                         |
| <a href="http://ke.mofcom.gov.cn/article/jmxw/200910/20091006552797.shtml">http://ke.mofcom.gov.cn/article/jmxw/200910/20091006552797.shtml</a>                             | Development assistance for health | Anti-malaria center | Web-Info | Overseas Embassy              | The antimalarial drugs funded by China was officially handed over to Kenya                                                                         |
| <a href="http://news.xinhuanet.com/photo/2008-09/27/content_10120239.htm">http://news.xinhuanet.com/photo/2008-09/27/content_10120239.htm</a>                               | Development assistance for health | Anti-malaria center | Web-Info | Press                         | The opening ceremony of China-Gabon Malaria Control Center was held                                                                                |
| <a href="http://www.fjwsb.net.cn/healthNews.asp?main=6&amp;pc=6&amp;cc=314&amp;id=18361">http://www.fjwsb.net.cn/healthNews.asp?main=6&amp;pc=6&amp;cc=314&amp;id=18361</a> | Development assistance for health | Anti-malaria center | Web-Info | Press                         | Fulfilled mission to fight malarial in Africa - The twelfth group of experts went to Africa fighting against malaria                               |
| <a href="http://world.people.com.cn/GB/1029/42359/11727139.html">http://world.people.com.cn/GB/1029/42359/11727139.html</a>                                                 | Development assistance for health | Anti-malaria center | Web-Info | Press                         | Successful implementation China aided General Hospital Project in Niger                                                                            |
| <a href="http://news.china.com.cn/rollnews/2010-01/28/content_352597.htm">http://news.china.com.cn/rollnews/2010-01/28/content_352597.htm</a>                               | Development assistance for health | Anti-malaria center | Web-Info | Press                         | The Chinese Ambassador to Rwanda, Sun Shuzhong, attended groundbreaking ceremony of China funded hospitals and malaria control center              |
| <a href="http://www.gzhtcm.edu.cn/news/xiaoyuandongtai/2k2q51s3flpeb1.html">http://www.gzhtcm.edu.cn/news/xiaoyuandongtai/2k2q51s3flpeb1.html</a>                           | Development assistance for health | Anti-malaria center | Web-Info | University                    | Guangzhou University of Traditional Chinese Medicine has achieved substantive results with the malaria prevention and treatment centers in Comoros |
| <a href="http://www.gov.cn/gzdt/2012-03/03/content_2081849.htm">http://www.gov.cn/gzdt/2012-03/03/content_2081849.htm</a>                                                   | Development assistance for health | China medical team  | Web-info | Central government of the PRC | The 13 <sup>th</sup> batch of Chinese medical team set out from Fujian to Botswana                                                                 |

| Source                                                                                                                                                                    | Topic                             | Sub-topic          | Category | Organization                           | Information title                                                                                                 |
|---------------------------------------------------------------------------------------------------------------------------------------------------------------------------|-----------------------------------|--------------------|----------|----------------------------------------|-------------------------------------------------------------------------------------------------------------------|
| <a href="http://www.fmprc.gov.cn/mfa_chn/wjdt_611265/zwbd_611281/t1062023.shtml">http://www.fmprc.gov.cn/mfa_chn/wjdt_611265/zwbd_611281/t1062023.shtml</a>               | Development assistance for health | China medical team | Web-info | Ministry of Foreign Affairs of the PRC | Chinese Embassy in the Republic of the Congo held the welcome party for Chinese medical team                      |
| <a href="http://gh.mofcom.gov.cn/article/slfw/201310/20131000333863.shtml">http://gh.mofcom.gov.cn/article/slfw/201310/20131000333863.shtml</a>                           | Development assistance for health | China medical team | Web-info | Ministry of Foreign Affairs of the PRC | Gao Zhiwen condoled the Chinese medical team members in Ghana                                                     |
| <a href="http://zimbabwe.mofcom.gov.cn/article/todayheader/201311/20131100400835.shtml">http://zimbabwe.mofcom.gov.cn/article/todayheader/201311/20131100400835.shtml</a> | Development assistance for health | China medical team | Web-info | Ministry of Foreign Affairs of the PRC | The 13 <sup>th</sup> batch of Chinese medical team in Zimbabwe donated medicines and medical equipment through NG |
| <a href="http://ls.mofcom.gov.cn/article/jmxw/201401/20140100467732.shtml">http://ls.mofcom.gov.cn/article/jmxw/201401/20140100467732.shtml</a>                           | Development assistance for health | China medical team | Web-info | Ministry of Foreign Affairs of the PRC | Liu Bohua condoled the Chinese medical team members in Lesotho                                                    |
| <a href="http://ao.mofcom.gov.cn/article/sqfb/201312/20131200416372.shtml">http://ao.mofcom.gov.cn/article/sqfb/201312/20131200416372.shtml</a>                           | Development assistance for health | China medical team | Web-info | Ministry of Commerce of the PRC        | Chinese Embassy held welcome party to the new Chinese Medical team in the Republic of Angola                      |
| <a href="http://er.mofcom.gov.cn/article/jmxw/201306/20130600158823.shtml">http://er.mofcom.gov.cn/article/jmxw/201306/20130600158823.shtml</a>                           | Development assistance for health | China medical team | Web-info | Ministry of Commerce of the PRC        | The new Chinese medical team in Eritrea successfully and smoothly took over the work                              |
| <a href="http://cv.mofcom.gov.cn/article/jmxw/201203/20120308039830.shtml">http://cv.mofcom.gov.cn/article/jmxw/201203/20120308039830.shtml</a>                           | Development assistance for health | China medical team | Web-info | Ministry of Commerce of the PRC        | China will send the 15 <sup>th</sup> batch of Chinese medical team to Cape Verde                                  |
| <a href="http://dj.china-embassy.org/chn/xwtd/t1025808.htm">http://dj.china-embassy.org/chn/xwtd/t1025808.htm</a>                                                         | Development assistance for health | China medical team | Web-info | Ministry of Commerce of the PRC        | China assigned the protocol of sending the 17 <sup>th</sup> batch of Chinese medical team to Djibouti             |

| <b>Source</b>                                                                                                                                                                           | <b>Topic</b>                      | <b>Sub-topic</b>   | <b>Category</b> | <b>Organization</b>                                       | <b>Information title</b>                                                                        |
|-----------------------------------------------------------------------------------------------------------------------------------------------------------------------------------------|-----------------------------------|--------------------|-----------------|-----------------------------------------------------------|-------------------------------------------------------------------------------------------------|
| <a href="http://gw.mofcom.gov.cn/article/jm_xw/201210/20121008372880.shtml">http://gw.mofcom.gov.cn/article/jm_xw/201210/20121008372880.shtml</a>                                       | Development assistance for health | China medical team | Web-info        | Ministry of Commerce of the PRC                           | The 14 <sup>th</sup> Chinese medical team formally launched in China-Guinea Friendship Hospital |
| <a href="http://md.mofcom.gov.cn/article/jm_xw/201304/20130400096028.shtml">http://md.mofcom.gov.cn/article/jm_xw/201304/20130400096028.shtml</a>                                       | Development assistance for health | China medical team | Web-info        | Ministry of Commerce of the PRC                           | The handover ceremony was held in Moldova                                                       |
| <a href="http://www.chinapop.gov.cn/gjhzs/dyhbz/201308/0605989509914e288b45822ab4a95a45.shtml">http://www.chinapop.gov.cn/gjhzs/dyhbz/201308/0605989509914e288b45822ab4a95a45.shtml</a> | Development assistance for health | China medical team | Web-Info        | National Health and Family Planning Commission of the PRC | The name list of Beijing foreign aid medical team                                               |
| <a href="http://www.nhfpc.gov.cn/gjhzs/dyhbz/201308/0605989509914e288b45822ab4a95a45.shtml">http://www.nhfpc.gov.cn/gjhzs/dyhbz/201308/0605989509914e288b45822ab4a95a45.shtml</a>       | Development assistance for health | China medical team | Web-Info        | National Health and Family Planning Commission of the PRC | The name list of Beijing City foreign aid medical team                                          |
| <a href="http://www.nhfpc.gov.cn/gjhzs/dyhbz/201308/07d6439eb438463b86521823bf5f0f6e.shtml">http://www.nhfpc.gov.cn/gjhzs/dyhbz/201308/07d6439eb438463b86521823bf5f0f6e.shtml</a>       | Development assistance for health | China medical team | Web-Info        | National Health and Family Planning Commission of the PRC | The name list of Hunan Province foreign aid medical team                                        |
| <a href="http://www.nhfpc.gov.cn/gjhzs/dyhbz/201308/181bd66fce0940db998a93570f962fc3.shtml">http://www.nhfpc.gov.cn/gjhzs/dyhbz/201308/181bd66fce0940db998a93570f962fc3.shtml</a>       | Development assistance for health | China medical team | Web-Info        | National Health and Family Planning Commission of the PRC | The name list of Jiangxi Province foreign aid medical team                                      |

| <b>Source</b>                                                                                                                                                                         | <b>Topic</b>                      | <b>Sub-topic</b>   | <b>Category</b> | <b>Organization</b>                                       | <b>Information title</b>                                        |
|---------------------------------------------------------------------------------------------------------------------------------------------------------------------------------------|-----------------------------------|--------------------|-----------------|-----------------------------------------------------------|-----------------------------------------------------------------|
| <a href="http://www.nhfpc.gov.cn/gjhzs/dyh bz/201308/38f15838ba504c93bcef6 23c937acddd.shtml">http://www.nhfpc.gov.cn/gjhzs/dyh bz/201308/38f15838ba504c93bcef6 23c937acddd.shtml</a> | Development assistance for health | China medical team | Web-Info        | National Health and Family Planning Commission of the PRC | The name list of Yunnan Province foreign aid medical team       |
| <a href="http://www.nhfpc.gov.cn/gjhzs/dyh bz/201308/3fe7ba575ac14a418559a 798c7a14823.shtml">http://www.nhfpc.gov.cn/gjhzs/dyh bz/201308/3fe7ba575ac14a418559a 798c7a14823.shtml</a> | Development assistance for health | China medical team | Web-Info        | National Health and Family Planning Commission of the PRC | The name list of Hebei Province foreign aid medical team        |
| <a href="http://www.nhfpc.gov.cn/gjhzs/dyh bz/201308/5df96397e78f4169914b 03ea168fc5dc.shtml">http://www.nhfpc.gov.cn/gjhzs/dyh bz/201308/5df96397e78f4169914b 03ea168fc5dc.shtml</a> | Development assistance for health | China medical team | Web-Info        | National Health and Family Planning Commission of the PRC | The name list of Heilongjiang Province foreign aid medical team |
| <a href="http://www.nhfpc.gov.cn/gjhzs/dyh bz/201308/6bd00a33c7674c2b959e 861f05798ad5.shtml">http://www.nhfpc.gov.cn/gjhzs/dyh bz/201308/6bd00a33c7674c2b959e 861f05798ad5.shtml</a> | Development assistance for health | China medical team | Web-Info        | National Health and Family Planning Commission of the PRC | The name list of Zhejiang Province foreign aid medical team     |
| <a href="http://www.nhfpc.gov.cn/gjhzs/dyh bz/201308/6dd7f80927a84b4580b9 28f6d85a21a5.shtml">http://www.nhfpc.gov.cn/gjhzs/dyh bz/201308/6dd7f80927a84b4580b9 28f6d85a21a5.shtml</a> | Development assistance for health | China medical team | Web-Info        | National Health and Family Planning Commission of the PRC | The name list of Chongqing City foreign aid medical team        |

| <b>Source</b>                                                                                                                                                                     | <b>Topic</b>                      | <b>Sub-topic</b>   | <b>Category</b> | <b>Organization</b>                                       | <b>Information title</b>                                          |
|-----------------------------------------------------------------------------------------------------------------------------------------------------------------------------------|-----------------------------------|--------------------|-----------------|-----------------------------------------------------------|-------------------------------------------------------------------|
| <a href="http://www.nhfpc.gov.cn/gjhzs/dyhbz/201308/70137c60f5e44c05afda44e853058c80.shtml">http://www.nhfpc.gov.cn/gjhzs/dyhbz/201308/70137c60f5e44c05afda44e853058c80.shtml</a> | Development assistance for health | China medical team | Web-Info        | National Health and Family Planning Commission of the PRC | The name list of Gaosu Province foreign aid medical team          |
| <a href="http://www.nhfpc.gov.cn/gjhzs/dyhbz/201308/7136721cc16e4de48faa7946e25ae6f5.shtml">http://www.nhfpc.gov.cn/gjhzs/dyhbz/201308/7136721cc16e4de48faa7946e25ae6f5.shtml</a> | Development assistance for health | China medical team | Web-Info        | National Health and Family Planning Commission of the PRC | The name list of Sichuan Province foreign aid medical team        |
| <a href="http://www.nhfpc.gov.cn/gjhzs/dyhbz/201308/7a7d2dfe937a44d8b63964a42f3f530c.shtml">http://www.nhfpc.gov.cn/gjhzs/dyhbz/201308/7a7d2dfe937a44d8b63964a42f3f530c.shtml</a> | Development assistance for health | China medical team | Web-Info        | National Health and Family Planning Commission of the PRC | The name list of Inner Mongolia Province foreign aid medical team |
| <a href="http://www.nhfpc.gov.cn/gjhzs/dyhbz/201308/7cbaef68d22144a1b2be261bf4fa8ac0.shtml">http://www.nhfpc.gov.cn/gjhzs/dyhbz/201308/7cbaef68d22144a1b2be261bf4fa8ac0.shtml</a> | Development assistance for health | China medical team | Web-Info        | National Health and Family Planning Commission of the PRC | The name list of Guangdong Province foreign aid medical team      |
| <a href="http://www.nhfpc.gov.cn/gjhzs/dyhbz/201308/83b78a3c12ce40229fd7898bc7dc0a13.shtml">http://www.nhfpc.gov.cn/gjhzs/dyhbz/201308/83b78a3c12ce40229fd7898bc7dc0a13.shtml</a> | Development assistance for health | China medical team | Web-Info        | National Health and Family Planning Commission of the PRC | The name list of Tianjin City foreign aid medical team            |

| <b>Source</b>                                                                                                                                                                     | <b>Topic</b>                      | <b>Sub-topic</b>   | <b>Category</b> | <b>Organization</b>                                       | <b>Information title</b>                                    |
|-----------------------------------------------------------------------------------------------------------------------------------------------------------------------------------|-----------------------------------|--------------------|-----------------|-----------------------------------------------------------|-------------------------------------------------------------|
| <a href="http://www.nhfpc.gov.cn/gjhzs/dyhbz/201308/8ab11d55614449468668ebbfa9b9e06c.shtml">http://www.nhfpc.gov.cn/gjhzs/dyhbz/201308/8ab11d55614449468668ebbfa9b9e06c.shtml</a> | Development assistance for health | China medical team | Web-Info        | National Health and Family Planning Commission of the PRC | The name list of Henan Province foreign aid medical team    |
| <a href="http://www.nhfpc.gov.cn/gjhzs/dyhbz/201308/912ec8645a814dd5b724180e7c42327d.shtml">http://www.nhfpc.gov.cn/gjhzs/dyhbz/201308/912ec8645a814dd5b724180e7c42327d.shtml</a> | Development assistance for health | China medical team | Web-Info        | National Health and Family Planning Commission of the PRC | The name list of Jiangsu Province foreign aid medical team  |
| <a href="http://www.nhfpc.gov.cn/gjhzs/dyhbz/201308/a19bb87743234a8188109483741605f6.shtml">http://www.nhfpc.gov.cn/gjhzs/dyhbz/201308/a19bb87743234a8188109483741605f6.shtml</a> | Development assistance for health | China medical team | Web-Info        | National Health and Family Planning Commission of the PRC | The name list of Shandong Province foreign aid medical team |
| <a href="http://www.nhfpc.gov.cn/gjhzs/dyhbz/201308/a7f2d58d5d604d9baf6cdad8d7894532.shtml">http://www.nhfpc.gov.cn/gjhzs/dyhbz/201308/a7f2d58d5d604d9baf6cdad8d7894532.shtml</a> | Development assistance for health | China medical team | Web-Info        | National Health and Family Planning Commission of the PRC | The name list of Shanxi Province foreign aid medical team   |
| <a href="http://www.nhfpc.gov.cn/gjhzs/dyhbz/201308/b6834ee9f3c1425a846e21e08978677b.shtml">http://www.nhfpc.gov.cn/gjhzs/dyhbz/201308/b6834ee9f3c1425a846e21e08978677b.shtml</a> | Development assistance for health | China medical team | Web-Info        | National Health and Family Planning Commission of the PRC | The name list of Shanghai City foreign aid medical team     |

| <b>Source</b>                                                                                                                                                                     | <b>Topic</b>                      | <b>Sub-topic</b>   | <b>Category</b> | <b>Organization</b>                                       | <b>Information title</b>                                                |
|-----------------------------------------------------------------------------------------------------------------------------------------------------------------------------------|-----------------------------------|--------------------|-----------------|-----------------------------------------------------------|-------------------------------------------------------------------------|
| <a href="http://www.nhfpc.gov.cn/gjhzs/dyhbz/201308/b801a1b0e2ab4bc6ab576fbd69c77706.shtml">http://www.nhfpc.gov.cn/gjhzs/dyhbz/201308/b801a1b0e2ab4bc6ab576fbd69c77706.shtml</a> | Development assistance for health | China medical team | Web-Info        | National Health and Family Planning Commission of the PRC | The name list of Guangxi Province foreign aid medical team              |
| <a href="http://www.nhfpc.gov.cn/gjhzs/dyhbz/201308/d084db71bf4c48f1b868562557b2c389.shtml">http://www.nhfpc.gov.cn/gjhzs/dyhbz/201308/d084db71bf4c48f1b868562557b2c389.shtml</a> | Development assistance for health | China medical team | Web-Info        | National Health and Family Planning Commission of the PRC | The name list of Qinghai Province foreign aid medical team              |
| <a href="http://www.nhfpc.gov.cn/gjhzs/dyhbz/201308/d4eec70c56da4d05863a1025decdbbf.shtml">http://www.nhfpc.gov.cn/gjhzs/dyhbz/201308/d4eec70c56da4d05863a1025decdbbf.shtml</a>   | Development assistance for health | China medical team | Web-Info        | National Health and Family Planning Commission of the PRC | The name list of Anhui Province foreign aid medical team                |
| <a href="http://www.nhfpc.gov.cn/gjhzs/dyhbz/201308/e1fc3d7be33443f6a8fad9b0d2cc0b9d.shtml">http://www.nhfpc.gov.cn/gjhzs/dyhbz/201308/e1fc3d7be33443f6a8fad9b0d2cc0b9d.shtml</a> | Development assistance for health | China medical team | Web-Info        | National Health and Family Planning Commission of the PRC | The name list of Liaoning Province foreign aid medical team             |
| <a href="http://www.nhfpc.gov.cn/gjhzs/dyhbz/201308/eba286dab76f46e9b182c878452c95ce.shtml">http://www.nhfpc.gov.cn/gjhzs/dyhbz/201308/eba286dab76f46e9b182c878452c95ce.shtml</a> | Development assistance for health | China medical team | Web-Info        | National Health and Family Planning Commission of the PRC | The name list of Ningxia Hui Autonomous Region foreign aid medical team |

| <b>Source</b>                                                                                                                                                                               | <b>Topic</b>                      | <b>Sub-topic</b>   | <b>Category</b> | <b>Organization</b>                                       | <b>Information title</b>                                                                                          |
|---------------------------------------------------------------------------------------------------------------------------------------------------------------------------------------------|-----------------------------------|--------------------|-----------------|-----------------------------------------------------------|-------------------------------------------------------------------------------------------------------------------|
| <a href="http://www.nhfpc.gov.cn/gjhzs/dyhbz/201308/f2f7fff75cf14e269ad6aedb3d0f4980.shtml">http://www.nhfpc.gov.cn/gjhzs/dyhbz/201308/f2f7fff75cf14e269ad6aedb3d0f4980.shtml</a>           | Development assistance for health | China medical team | Web-Info        | National Health and Family Planning Commission of the PRC | The name list of Shanxi Province foreign aid medical team                                                         |
| <a href="http://www.nhfpc.gov.cn/gjhzs/dyhbz/201308/fa9d9cdf02c74583abaa52172b545c34.shtml">http://www.nhfpc.gov.cn/gjhzs/dyhbz/201308/fa9d9cdf02c74583abaa52172b545c34.shtml</a>           | Development assistance for health | China medical team | Web-Info        | National Health and Family Planning Commission of the PRC | The name list of Fujian Province foreign aid medical team                                                         |
| <a href="http://www.nhfpc.gov.cn/gjhzs/dyhbz/201308/faed2c6c47404ec9a5d2deb5fd500342.shtml">http://www.nhfpc.gov.cn/gjhzs/dyhbz/201308/faed2c6c47404ec9a5d2deb5fd500342.shtml</a>           | Development assistance for health | China medical team | Web-Info        | National Health and Family Planning Commission of the PRC | The name list of Hubei Province foreign aid medical team                                                          |
| <a href="http://www.jkb.com.cn/htmlpage/38/385859.htm?docid=385859&amp;cat=0I&amp;sKeyWord=null">http://www.jkb.com.cn/htmlpage/38/385859.htm?docid=385859&amp;cat=0I&amp;sKeyWord=null</a> | Development assistance for health | China medical team | Web-info        | National Health and Family Planning Commission of the PRC | The 15 <sup>th</sup> batch of Chinese medical team set off to Senegal, September 12, 2013                         |
| <a href="http://www.sdyzz.com.cn/Article/3ASheNei/2013081405.htm">http://www.sdyzz.com.cn/Article/3ASheNei/2013081405.htm</a>                                                               | Development assistance for health | China medical team | Web-Info        | Press                                                     | History of foreign medical aid-Beijing (1968-2013)                                                                |
| <a href="http://news.xinhuanet.com/2013-04/26/c_115558176.htm">http://news.xinhuanet.com/2013-04/26/c_115558176.htm</a>                                                                     | Development assistance for health | China medical team | Web-info        | Press                                                     | Chinese Embassy held a reception to celebrate the 50 <sup>th</sup> anniversary of Chinese medical team in Algeria |



| Source                                                                                                                                                              | Topic                             | Sub-topic          | Category | Organization                     | Information title                                                                                                                          |
|---------------------------------------------------------------------------------------------------------------------------------------------------------------------|-----------------------------------|--------------------|----------|----------------------------------|--------------------------------------------------------------------------------------------------------------------------------------------|
| <a href="http://news.sina.com.cn/c/2013-12-10/083028932124.shtml">http://news.sina.com.cn/c/2013-12-10/083028932124.shtml</a>                                       | Development assistance for health | China medical team | Web-info | Press                            | The 3 <sup>th</sup> batch of Chinese medical team to Ghana will set off                                                                    |
| <a href="http://www.imfic.com.cn/xwzx/xwj/dc7d8798_396e_45e4_b268_3beae92032e5.html">http://www.imfic.com.cn/xwzx/xwj/dc7d8798_396e_45e4_b268_3beae92032e5.html</a> | Development assistance for health | China medical team | Web-info | Press                            | The Chinese medical team from Inner Mongolia to Rwanda set off                                                                             |
| <a href="http://zjnews.zjol.com.cn/05zjnews/system/2013/01/08/019072205.shtml">http://zjnews.zjol.com.cn/05zjnews/system/2013/01/08/019072205.shtml</a>             | Development assistance for health | China medical team | Web-info | Press                            | The 15 <sup>th</sup> batch of Chinese medical team selected by Zhejiang Province to Central Africa had a memorable experience in Africa    |
| <a href="http://www.jswsgj.cn/ShowNews.aspx?Id=410">http://www.jswsgj.cn/ShowNews.aspx?Id=410</a>                                                                   | Development assistance for health | China medical team | Web-info | Press                            | The 11 <sup>th</sup> batch of Chinese medical team to Malta set off                                                                        |
| <a href="http://www.hbws.gov.cn/detail/20120424084053000001.html">http://www.hbws.gov.cn/detail/20120424084053000001.html</a>                                       | Development assistance for health | China medical team | Web-Info | Provincial government of the PRC | Zhang Yu, deputy director of Hubei Provincial NHFPC, attended the opening ceremony of training course for the 23th medical team to Algeria |
| <a href="http://www.lndoh.gov.cn/zfxgk/ws/kx/201211/t20121112_996030.html">http://www.lndoh.gov.cn/zfxgk/ws/kx/201211/t20121112_996030.html</a>                     | Development assistance for health | China medical team | Web-Info | Provincial government of the PRC | Han Minghui, deputy director of Liaoning Provincial NHFPC, visited Yemen and discussed the medical aid issue                               |
| <a href="http://www.people.com.cn/h/2012/0726/c25408-1-1654062677.html">http://www.people.com.cn/h/2012/0726/c25408-1-1654062677.html</a>                           | Development assistance for health | China medical team | Web-info | Provincial government of the PRC | Henan Province will send three more Chinese medical teams to African countries                                                             |
| <a href="http://www.nxws.gov.cn/Article/gzdt/zhgl/201312/20131226151825_12406.html">http://www.nxws.gov.cn/Article/gzdt/zhgl/201312/20131226151825_12406.html</a>   | Development assistance for health | China medical team | Web-info | Provincial government of the PRC | Another batch of Chinese medical team came back from Benin with honor                                                                      |

| Source                                                                                                                                                                                          | Topic                             | Sub-topic          | Category | Organization                     | Information title                                                                                                                                       |
|-------------------------------------------------------------------------------------------------------------------------------------------------------------------------------------------------|-----------------------------------|--------------------|----------|----------------------------------|---------------------------------------------------------------------------------------------------------------------------------------------------------|
| <a href="http://www.sxswst.gov.cn/bureau/MesIssueContentBeta2.asp?SubType=tggg&amp;ConID=3577">http://www.sxswst.gov.cn/bureau/MesIssueContentBeta2.asp?SubType=tggg&amp;ConID=3577</a>         | Development assistance for health | China medical team | Web-info | Provincial government of the PRC | The 16 <sup>th</sup> batch of Chinese medical team to Togo and 17 <sup>th</sup> batch to Djibouti was selected by Department of Health, Shanxi Province |
| <a href="http://www.jkb.com.cn/htmlpage/38/386088.htm?docid=386088&amp;cat=null&amp;sKeyWord=null">http://www.jkb.com.cn/htmlpage/38/386088.htm?docid=386088&amp;cat=null&amp;sKeyWord=null</a> | Development assistance for health | China medical team | Web-info | Provincial government of the PRC | The Chinese medical team selected by Shanxi Province, China                                                                                             |
| <a href="http://www.sxhealth.gov.cn/newstyle/pub_newsshow.asp?id=1025804&amp;chid=100237">http://www.sxhealth.gov.cn/newstyle/pub_newsshow.asp?id=1025804&amp;chid=100237</a>                   | Development assistance for health | China medical team | Web-info | Provincial government of the PRC | Shanxi Province held the farewell party for the 3th batch of Chinese medical team to Malawi                                                             |
| <a href="http://www.zj.gov.cn/art/2013/7/22/art_6695_802236.html">http://www.zj.gov.cn/art/2013/7/22/art_6695_802236.html</a>                                                                   | Development assistance for health | China medical team | Web-info | Provincial government of the PRC | The 23th batch of Chinese medical team from Zhejiang Province to Mali will set off                                                                      |
| <a href="http://www.yydj.gov.cn/html/xinwenzhongxin/yueyangbendi/15843.html">http://www.yydj.gov.cn/html/xinwenzhongxin/yueyangbendi/15843.html</a>                                             | Development assistance for health | China medical team | Web-info | Provincial government of the PRC | Yuanyang City held farewell party for the Chinese medical team to Sierra Leone                                                                          |
| <a href="http://www.xyws.gov.cn/news/21/9132.html">http://www.xyws.gov.cn/news/21/9132.html</a>                                                                                                 | Development assistance for health | China medical team | Web-info | Provincial government of the PRC | The farewell party for the 31th batch of Chinese medical team to Sudan was held in Shanxi Province                                                      |
| <a href="http://www.czws.gov.cn/html/wsj/2013/PELPIODF_0530/16942.html">http://www.czws.gov.cn/html/wsj/2013/PELPIODF_0530/16942.html</a>                                                       | Development assistance for health | China medical team | Web-info | Provincial government of the PRC | Changzhou City held the farewell party for the 25 <sup>th</sup> batch of Chinese medical team to Tanzania                                               |
| <a href="http://sd.sdnews.com.cn/yw/201308/t20130805_1305225.htm">http://sd.sdnews.com.cn/yw/201308/t20130805_1305225.htm</a>                                                                   | Development assistance for health | China medical team | Web-info | Provincial government of the PRC | Shandong Province send the 23th batch of Chinese medical team to Tanzania                                                                               |

| Source                                                                                                                                        | Topic                             | Sub-topic          | Category  | Organization                     | Information title                                                                                                                                    |
|-----------------------------------------------------------------------------------------------------------------------------------------------|-----------------------------------|--------------------|-----------|----------------------------------|------------------------------------------------------------------------------------------------------------------------------------------------------|
| <a href="http://ccwb.yunnan.cn/html/2012-12/04/content_650266.htm?div=-1">http://ccwb.yunnan.cn/html/2012-12/04/content_650266.htm?div=-1</a> | Development assistance for health | China medical team | Web-info  | Provincial government of the PRC | Yunnan Province selected 14 medical professional as the 16 <sup>th</sup> batch of Chinese medical team to Uganda                                     |
| <a href="http://jk.jxcn.cn/system/2013/06/20/012477650.shtml">http://jk.jxcn.cn/system/2013/06/20/012477650.shtml</a>                         | Development assistance for health | China medical team | Web-info  | Provincial government of the PRC | The 10 <sup>th</sup> batch of Chinese medical team selected by Jiangxi Province to Chad set off,                                                     |
| <a href="http://www.lndoh.gov.cn/zfxgk/wskx/201211/t20121112_996030.html">http://www.lndoh.gov.cn/zfxgk/wskx/201211/t20121112_996030.html</a> | Development assistance for health | China medical team | Web-info  | Provincial government of the PRC | The deputy director-general of Health and Family Planning Commission of Liaoning Province flied to Yemen to discuss the work of Chinese medical team |
| <a href="http://www.simec.org.cn/exchanges/ShowPage.aspx?ID=14">http://www.simec.org.cn/exchanges/ShowPage.aspx?ID=14</a>                     | Development assistance for health | China medical team | Web-info  | University                       | The Chinese medical team in Morocco                                                                                                                  |
| People's Daily 07/22/1970                                                                                                                     | Development assistance for health | Hospital           | Newspaper | Press                            | Celebrate the completion of Abdallah Mzee Hospital funded by China                                                                                   |
| People's Daily 08/02/1975                                                                                                                     | Development assistance for health | Hospital           | Newspaper | Press                            | The handover ceremony of China funded hospital and water supply project was held in Owando                                                           |
| People's Daily 12/08/1976                                                                                                                     | Development assistance for health | Hospital           | Newspaper | Press                            | The birth of Tanzania pharmaceutical factory                                                                                                         |
| People's Daily 05/07/1976                                                                                                                     | Development assistance for health | Hospital           | Newspaper | Press                            | Chairman Hamdi visited Taiz Revolutionary Hospital                                                                                                   |
| People's Daily 03/12/1977                                                                                                                     | Development assistance for health | Hospital           | Newspaper | Press                            | The Benadir Gynecological, Obstetrics and Pediatric Hospital funded by China was handed over to Somalia                                              |
| People's Daily 03/24/1979                                                                                                                     | Development assistance for health | Hospital           | Newspaper | Press                            | Friendly exchanges: The opening ceremony of Kandahar Hospital                                                                                        |

| <b>Source</b>                                                                                                                                                                                      | <b>Topic</b>                      | <b>Sub-topic</b> | <b>Category</b> | <b>Organization</b>                    | <b>Information title</b>                                                                                                                                                    |
|----------------------------------------------------------------------------------------------------------------------------------------------------------------------------------------------------|-----------------------------------|------------------|-----------------|----------------------------------------|-----------------------------------------------------------------------------------------------------------------------------------------------------------------------------|
| People's Daily 12/16/1979                                                                                                                                                                          | Development assistance for health | Hospital         | Newspaper       | Press                                  | China donated a hospital to Mauritania                                                                                                                                      |
| People's Daily 09/02/1983                                                                                                                                                                          | Development assistance for health | Hospital         | Newspaper       | Press                                  | President of Gambia complimented the health center funded by China                                                                                                          |
| People's Daily 02/02/1996                                                                                                                                                                          | Development assistance for health | Hospital         | Newspaper       | Press                                  | China funded Jinnah Hospital came into operation in Pakistan                                                                                                                |
| <a href="http://www.fmprc.gov.cn/mfa_chn/wjdt_611265/zwbd_611281/t824392.shtml">http://www.fmprc.gov.cn/mfa_chn/wjdt_611265/zwbd_611281/t824392.shtml</a>                                          | Development assistance for health | Hospital         | Web-Info        | Ministry of Foreign Affairs of the PRC | The Chinese Ambassador to Cape Verde, Li Chunhua, and the Prime Minister of Cape Verde, Neves Buddha, attended the launching ceremony of China funded construction projects |
| <a href="http://www.fmprc.gov.cn/zflt/chn/xxx/t1097590.htm">http://www.fmprc.gov.cn/zflt/chn/xxx/t1097590.htm</a>                                                                                  | Development assistance for health | Hospital         | Web-Info        | Ministry of Foreign Affairs of the PRC | The Chinese Ambassador to South Sudan, Ma Qiang, published a signed article in the local media                                                                              |
| <a href="http://images.mofcom.gov.cn/kaifangzhan/accessory/dsj_gb.pdf">http://images.mofcom.gov.cn/kaifangzhan/accessory/dsj_gb.pdf</a>                                                            | Development assistance for health | Hospital         | Web-Info        | Ministry of Commerce of the PRC        | Events in China's 30-year opening up history: Mauritania                                                                                                                    |
| A 30-Year History: Exhibition on China's Opening Up:<br><a href="http://images.mofcom.gov.cn/kaifangzhan/accessory/dsj_gb.pdf">Up:http://images.mofcom.gov.cn/kaifangzhan/accessory/dsj_gb.pdf</a> | Development assistance for health | Hospital         | Web-Info        | Ministry of Commerce of the PRC        | A 30-Year History: Exhibition on China's Opening Up: Botswana                                                                                                               |
| A 30-Year History: Exhibition on China's Opening Up:<br><a href="http://images.mofcom.gov.cn/kaifangzhan/accessory/dsj_gb.pdf">Up:http://images.mofcom.gov.cn/kaifangzhan/accessory/dsj_gb.pdf</a> | Development assistance for health | Hospital         | Web-Info        | Ministry of Commerce of the PRC        | Events in China's 30-year opening up history: Ghana                                                                                                                         |

| <b>Source</b>                                                                                                                                                                                     | <b>Topic</b>                      | <b>Sub-topic</b> | <b>Category</b> | <b>Organization</b>             | <b>Information title</b>                                                                 |
|---------------------------------------------------------------------------------------------------------------------------------------------------------------------------------------------------|-----------------------------------|------------------|-----------------|---------------------------------|------------------------------------------------------------------------------------------|
| A 30-Year History: Exhibition on China's Opening<br>Up: <a href="http://images.mofcom.gov.cn/kafifangzhan/accessory/dsj_gb.pdf">http://images.mofcom.gov.cn/kafifangzhan/accessory/dsj_gb.pdf</a> | Development assistance for health | Hospital         | Web-Info        | Ministry of Commerce of the PRC | Events in China's 30-year opening up history: Congo                                      |
| A 30-Year History: Exhibition on China's Opening<br>Up: <a href="http://images.mofcom.gov.cn/kafifangzhan/accessory/dsj_gb.pdf">http://images.mofcom.gov.cn/kafifangzhan/accessory/dsj_gb.pdf</a> | Development assistance for health | Hospital         | Web-Info        | Ministry of Commerce of the PRC | Events in China's 30-year opening up history: Democratic Republic of the Congo           |
| A 30-Year History: Exhibition on China's Opening<br>Up: <a href="http://images.mofcom.gov.cn/kafifangzhan/accessory/dsj_gb.pdf">http://images.mofcom.gov.cn/kafifangzhan/accessory/dsj_gb.pdf</a> | Development assistance for health | Hospital         | Web-Info        | Ministry of Commerce of the PRC | Events in China's 30-year opening up history: Indonesia                                  |
| <a href="http://jjhzj.mofcom.gov.cn/aarticle/g/201005/20100506914166.html">http://jjhzj.mofcom.gov.cn/aarticle/g/201005/20100506914166.html</a>                                                   | Development assistance for health | Hospital         | Web-Info        | Ministry of Commerce of the PRC | The Minister of Health in Mauritania visited the Friendship Hospital funded by China     |
| <a href="http://jjhzj.mofcom.gov.cn/aarticle/g/201110/20111007776116.html">http://jjhzj.mofcom.gov.cn/aarticle/g/201110/20111007776116.html</a>                                                   | Development assistance for health | Hospital         | Web-Info        | Ministry of Commerce of the PRC | The handover ceremony of China funded Damazin General Hospital was held in Sudan         |
| <a href="http://jjhzj.mofcom.gov.cn/aarticle/y/201108/20110807690100.html">http://jjhzj.mofcom.gov.cn/aarticle/y/201108/20110807690100.html</a>                                                   | Development assistance for health | Hospital         | Web-Info        | Ministry of Commerce of the PRC | Contract of China aided Medical School of Nouakchott University in Mauritania was signed |

| Source                                                                                                                                                                          | Topic                             | Sub-topic | Category | Organization                                              | Information title                                                                                                                                      |
|---------------------------------------------------------------------------------------------------------------------------------------------------------------------------------|-----------------------------------|-----------|----------|-----------------------------------------------------------|--------------------------------------------------------------------------------------------------------------------------------------------------------|
| <a href="http://www.nhfpc.gov.cn/gjhzs/gzdt/201308/15eb6805aa0c4da9a5c0c092bda08082.shtml">http://www.nhfpc.gov.cn/gjhzs/gzdt/201308/15eb6805aa0c4da9a5c0c092bda08082.shtml</a> | Development assistance for health | Hospital  | Web-Info | National Health and Family Planning Commission of the PRC | Events in the history of China's medical assistance to foreign countries : The China funded national hygiene center comes into operation in Mauritania |
| <a href="http://np.mofcom.gov.cn/article/zxhz/zhengt/200303/20030300078860.shtml">http://np.mofcom.gov.cn/article/zxhz/zhengt/200303/20030300078860.shtml</a> ;                 | Development assistance for health | Hospital  | Web-Info | Overseas Embassy                                          | China provided aid to Nepal                                                                                                                            |
| <a href="http://cm.mofcom.gov.cn/article/zxhz/hzjj/201001/20100106750442.shtml">http://cm.mofcom.gov.cn/article/zxhz/hzjj/201001/20100106750442.shtml</a>                       | Development assistance for health | Hospital  | Web-Info | Overseas Embassy                                          | Introduction to China funded Yaoundé Women & Children Hospital                                                                                         |
| <a href="http://cm.mofcom.gov.cn/article/jmxw/200307/20030700106415.shtml">http://cm.mofcom.gov.cn/article/jmxw/200307/20030700106415.shtml</a>                                 | Development assistance for health | Hospital  | Web-Info | Overseas Embassy                                          | Hainan International company donated a diesel generating set to Cameroon hospital                                                                      |
| <a href="http://cv.mofcom.gov.cn/article/zxhz/200509/20050900339667.shtml">http://cv.mofcom.gov.cn/article/zxhz/200509/20050900339667.shtml</a>                                 | Development assistance for health | Hospital  | Web-Info | Overseas Embassy                                          | Congress Hall maintenance in Cape Verde and other two projects were formally handed over                                                               |
| <a href="http://dj.mofcom.gov.cn/article/jmxw/200610/20061003351328.shtml">http://dj.mofcom.gov.cn/article/jmxw/200610/20061003351328.shtml</a>                                 | Development assistance for health | Hospital  | Web-Info | Overseas Embassy                                          | China signed the handover protocol of kidney dialysis room with Djibouti                                                                               |
| <a href="http://ma.mofcom.gov.cn/article/jmxw/200405/20040500223579.shtml">http://ma.mofcom.gov.cn/article/jmxw/200405/20040500223579.shtml</a>                                 | Development assistance for health | Hospital  | Web-Info | Overseas Embassy                                          | China signed up the contract of clinic construction program with Marcos                                                                                |
| <a href="http://gw.mofcom.gov.cn/article/jmxw/200803/20080305408589.shtml">http://gw.mofcom.gov.cn/article/jmxw/200803/20080305408589.shtml</a>                                 | Development assistance for health | Hospital  | Web-Info | Overseas Embassy                                          | Program completion ceremony for hospital maintenance in Guinea                                                                                         |
| <a href="http://tg.mofcom.gov.cn/article/jmxw/200906/20090606344700.shtml">http://tg.mofcom.gov.cn/article/jmxw/200906/20090606344700.shtml</a>                                 | Development assistance for health | Hospital  | Web-Info | Overseas Embassy                                          | Program completion ceremony for hospital building in Togo                                                                                              |
| <a href="http://af.mofcom.gov.cn/article/jmxw/200908/20090806467430.shtml">http://af.mofcom.gov.cn/article/jmxw/200908/20090806467430.shtml</a>                                 | Development assistance for health | Hospital  | Web-Info | Overseas Embassy                                          | Afghan media reports China helps funding their hospital building project                                                                               |

| <b>Source</b>                                                                                                                                                 | <b>Topic</b>                      | <b>Sub-topic</b> | <b>Category</b> | <b>Organization</b> | <b>Information title</b>                                                                                               |
|---------------------------------------------------------------------------------------------------------------------------------------------------------------|-----------------------------------|------------------|-----------------|---------------------|------------------------------------------------------------------------------------------------------------------------|
| <a href="http://np.mofcom.gov.cn/article/jmxw/200906/20090606290162.shtml">http://np.mofcom.gov.cn/article/jmxw/200906/20090606290162.shtml</a>               | Development assistance for health | Hospital         | Web-Info        | Overseas Embassy    | Nepal Prime Minister attends the opening ceremony of Nigerian Civil Hospital funded by China                           |
| <a href="http://ag.mofcom.gov.cn/article/jmxw/200902/20090206047329.shtml">http://ag.mofcom.gov.cn/article/jmxw/200902/20090206047329.shtml</a>               | Development assistance for health | Hospital         | Web-Info        | Overseas Embassy    | The opening ceremony of medical center                                                                                 |
| <a href="http://gn.mofcom.gov.cn/article/jmxw/201011/20101107218304.shtml">http://gn.mofcom.gov.cn/article/jmxw/201011/20101107218304.shtml</a>               | Development assistance for health | Hospital         | Web-Info        | Overseas Embassy    | The Chinese Ambassador to Guinea, Zhao Lixing, visited several hospitals and stadiums funded by China                  |
| <a href="http://lr.mofcom.gov.cn/article/jmxw/201007/20100707043474.shtml">http://lr.mofcom.gov.cn/article/jmxw/201007/20100707043474.shtml</a>               | Development assistance for health | Hospital         | Web-Info        | Overseas Embassy    | The handover ceremony of China funded hospital was held in Linya                                                       |
| <a href="http://ml.mofcom.gov.cn/article/jmxw/201009/20100907153812.shtml">http://ml.mofcom.gov.cn/article/jmxw/201009/20100907153812.shtml</a>               | Development assistance for health | Hospital         | Web-Info        | Overseas Embassy    | The signing-up and handover ceremony of China funded hospitals was held in Bamako, Mali                                |
| <a href="http://gh.mofcom.gov.cn/article/slfw/201012/20101207324269.shtml">http://gh.mofcom.gov.cn/article/slfw/201012/20101207324269.shtml</a>               | Development assistance for health | Hospital         | Web-Info        | Overseas Embassy    | The handover ceremony of China funded general hospital was held in Ghana                                               |
| <a href="http://bj.mofcom.gov.cn/article/ddfg/201010/20101007189409.shtml">http://bj.mofcom.gov.cn/article/ddfg/201010/20101007189409.shtml</a>               | Development assistance for health | Hospital         | Web-Info        | Overseas Embassy    | China signed the handover protocol of China funded hospital with Benin                                                 |
| <a href="http://gw.mofcom.gov.cn/article/todayheader/201008/20100807106332.shtml">http://gw.mofcom.gov.cn/article/todayheader/201008/20100807106332.shtml</a> | Development assistance for health | Hospital         | Web-Info        | Overseas Embassy    | The Chinese Embassy in Guinea held the opening and handover ceremony of the China funded Friendship Hospital to Guinea |
| <a href="http://jo.mofcom.gov.cn/article/jmxw/200804/20080405494201.shtml">http://jo.mofcom.gov.cn/article/jmxw/200804/20080405494201.shtml</a>               | Development assistance for health | Hospital         | Web-Info        | Overseas Embassy    | The launching ceremony of China funded hospital was held in Jordan                                                     |
| <a href="http://sl.mofcom.gov.cn/article/zxhz/z/zjg/201105/20110507549361.shtml">http://sl.mofcom.gov.cn/article/zxhz/z/zjg/201105/20110507549361.shtml</a>   | Development assistance for health | Hospital         | Web-Info        | Overseas Embassy    | Sierra Leone government held the handover ceremony of China funded hospital                                            |
| <a href="http://ci.mofcom.gov.cn/article/jmxw/201111/20111107853900.shtml">http://ci.mofcom.gov.cn/article/jmxw/201111/20111107853900.shtml</a>               | Development assistance for health | Hospital         | Web-Info        | Overseas Embassy    | The handover ceremony of China funded hospital was held in Cote d'Ivoire                                               |

| Source                                                                                                                                                    | Topic                             | Sub-topic | Category | Organization     | Information title                                                                                           |
|-----------------------------------------------------------------------------------------------------------------------------------------------------------|-----------------------------------|-----------|----------|------------------|-------------------------------------------------------------------------------------------------------------|
| <a href="http://bi.mofcom.gov.cn/article/jmxw/201101/20110107372069.shtml">http://bi.mofcom.gov.cn/article/jmxw/201101/20110107372069.shtml</a>           | Development assistance for health | Hospital  | Web-Info | Overseas Embassy | The President of Burundi attended the Completion Ceremony of China funded Bumubangda General Hospital       |
| <a href="http://rw.mofcom.gov.cn/article/jmxw/200905/20090506222950.shtml">http://rw.mofcom.gov.cn/article/jmxw/200905/20090506222950.shtml</a>           | Development assistance for health | Hospital  | Web-Info | Overseas Embassy | China signed up the contract of hospital construction program with Rwanda                                   |
| <a href="http://tz.mofcom.gov.cn/article/jmxw/201202/20120207955751.shtml">http://tz.mofcom.gov.cn/article/jmxw/201202/20120207955751.shtml</a>           | Development assistance for health | Hospital  | Web-Info | Overseas Embassy | China signed up the handover protocol of the Cardiac Surgery training center with Tanzania                  |
| <a href="http://sc.mofcom.gov.cn/article/jmxw/200907/20090706380329.shtml">http://sc.mofcom.gov.cn/article/jmxw/200907/20090706380329.shtml</a>           | Development assistance for health | Hospital  | Web-Info | Overseas Embassy | The launching ceremony of China funded hospital was held in Seychelles                                      |
| <a href="http://dj.mofcom.gov.cn/article/jmxw/201110/20111007800003.shtml">http://dj.mofcom.gov.cn/article/jmxw/201110/20111007800003.shtml</a>           | Development assistance for health | Hospital  | Web-Info | Overseas Embassy | The handover ceremony of China funded hospital was held in Djibouti                                         |
| <a href="http://ke.mofcom.gov.cn/article/waimao/201108/20110807682765.shtml">http://ke.mofcom.gov.cn/article/waimao/201108/20110807682765.shtml</a>       | Development assistance for health | Hospital  | Web-Info | Overseas Embassy | The handover ceremony of China funded hospital was held in Kenya                                            |
| <a href="http://ug.mofcom.gov.cn/article/jmxw/201201/20120107922464.shtml">http://ug.mofcom.gov.cn/article/jmxw/201201/20120107922464.shtml</a>           | Development assistance for health | Hospital  | Web-Info | Overseas Embassy | The handover ceremony of China funded General Hospital and antimalarial drugs was held in capital of Uganda |
| <a href="http://et.mofcom.gov.cn/article/jmxw/201111/20111107837751.shtml">http://et.mofcom.gov.cn/article/jmxw/201111/20111107837751.shtml</a>           | Development assistance for health | Hospital  | Web-Info | Overseas Embassy | Vice Minister Jiang Yaoping successfully completed the visit to Ethiopia                                    |
| <a href="http://na.mofcom.gov.cn/article/jmxw/201105/20110507532500.shtml">http://na.mofcom.gov.cn/article/jmxw/201105/20110507532500.shtml</a>           | Development assistance for health | Hospital  | Web-Info | Overseas Embassy | China funded general hospital in Namibia passed the acceptance check                                        |
| <a href="http://zm.mofcom.gov.cn/article/jmxw/201108/20110807686787.shtml">http://zm.mofcom.gov.cn/article/jmxw/201108/20110807686787.shtml</a>           | Development assistance for health | Hospital  | Web-Info | Overseas Embassy | The completion ceremony of China funded general hospital was held in Lusaka, Zambia                         |
| <a href="http://pe.mofcom.gov.cn/article/zxhz/hzjj/201105/20110507552829.shtml">http://pe.mofcom.gov.cn/article/zxhz/hzjj/201105/20110507552829.shtml</a> | Development assistance for health | Hospital  | Web-Info | Overseas Embassy | China helps funding the hospital expansion project in Peru                                                  |



| Source                                                                                                                                                                    | Topic                             | Sub-topic | Category | Organization     | Information title                                                                                                                                               |
|---------------------------------------------------------------------------------------------------------------------------------------------------------------------------|-----------------------------------|-----------|----------|------------------|-----------------------------------------------------------------------------------------------------------------------------------------------------------------|
| ml                                                                                                                                                                        |                                   |           |          |                  |                                                                                                                                                                 |
| <a href="http://to.mofcom.gov.cn/article/jmxw/201007/20100707049051.shtml">http://to.mofcom.gov.cn/article/jmxw/201007/20100707049051.shtml</a>                           | Development assistance for health | Hospital  | Web-Info | Overseas Embassy | Tonga Ministry of Health hold welcome ceremony for China's medical team                                                                                         |
| <a href="http://to.mofcom.gov.cn/article/jmxw/201111/20111107824100.shtml">http://to.mofcom.gov.cn/article/jmxw/201111/20111107824100.shtml</a>                           | Development assistance for health | Hospital  | Web-Info | Overseas Embassy | The opening ceremony of China funded health clinics was held in Varney, Tonga                                                                                   |
| <a href="http://to.mofcom.gov.cn/article/jmxw/201207/20120708238099.shtml">http://to.mofcom.gov.cn/article/jmxw/201207/20120708238099.shtml</a>                           | Development assistance for health | Hospital  | Web-Info | Overseas Embassy | Tonga Ministry of Health hold farewell ceremony for China's medical team                                                                                        |
| <a href="http://np.mofcom.gov.cn/article/jmxw/201104/20110407484130.shtml">http://np.mofcom.gov.cn/article/jmxw/201104/20110407484130.shtml</a>                           | Development assistance for health | Hospital  | Web-Info | Overseas Embassy | The handover ceremony of China funded traditional medicine study and training center was held in Kathmandu, Nepal                                               |
| <a href="http://ws.mofcom.gov.cn/article/jmxw/201107/20110707660692.shtml">http://ws.mofcom.gov.cn/article/jmxw/201107/20110707660692.shtml</a>                           | Development assistance for health | Hospital  | Web-Info | Overseas Embassy | The completion and handover ceremony of the construction project of Samoa's Ministry of Health funded by Chinese concessional loan projects was held            |
| <a href="http://lr.mofcom.gov.cn/article/jmxw/201109/20110907749154.shtml">http://lr.mofcom.gov.cn/article/jmxw/201109/20110907749154.shtml</a>                           | Development assistance for health | Hospital  | Web-Info | Overseas Embassy | The Liberian President, Sirleaf, visited the construction project of the Ministry of Health funded by China and some projects contracted with Chinese companies |
| <a href="http://nigeria.mofcom.gov.cn/article/slfw/201301/20130100016136.shtml">http://nigeria.mofcom.gov.cn/article/slfw/201301/20130100016136.shtml</a>                 | Development assistance for health | Hospital  | Web-Info | Overseas Embassy | The handover ceremony of China funded General Hospital was held in Nigeria                                                                                      |
| <a href="http://zimbabwe.mofcom.gov.cn/article/todayheader/201209/20120908360793.shtml">http://zimbabwe.mofcom.gov.cn/article/todayheader/201209/20120908360793.shtml</a> | Development assistance for health | Hospital  | Web-Info | Overseas Embassy | China completed technical transfer to China funded hospital in Zimbabwe                                                                                         |

| <b>Source</b>                                                                                                                                                 | <b>Topic</b>                      | <b>Sub-topic</b> | <b>Category</b> | <b>Organization</b> | <b>Information title</b>                                                                                      |
|---------------------------------------------------------------------------------------------------------------------------------------------------------------|-----------------------------------|------------------|-----------------|---------------------|---------------------------------------------------------------------------------------------------------------|
| <a href="http://senegal.mofcom.gov.cn/article/c/201112/20111207872165.shtml">http://senegal.mofcom.gov.cn/article/c/201112/20111207872165.shtml</a>           | Development assistance for health | Hospital         | Web-Info        | Overseas Embassy    | The Senegalese President, Abdoulaye Wade, visited the Children's Hospital funded by China                     |
| <a href="http://cf.mofcom.gov.cn/article/jmxw/201110/20111007767439.shtml">http://cf.mofcom.gov.cn/article/jmxw/201110/20111007767439.shtml</a>               | Development assistance for health | Hospital         | Web-Info        | Overseas Embassy    | The handover ceremony of China funded hospital was held in the Central African Republic                       |
| <a href="http://pk.mofcom.gov.cn/article/jmxw/200811/20081105865281.shtml">http://pk.mofcom.gov.cn/article/jmxw/200811/20081105865281.shtml</a>               | Development assistance for health | Hospital         | Web-Info        | Overseas Embassy    | China signed the contract to help Pakistan with the construction of hospitals and in earthquake-stricken area |
| <a href="http://km.mofcom.gov.cn/article/jmxw/201112/20111207896322.shtml">http://km.mofcom.gov.cn/article/jmxw/201112/20111207896322.shtml</a>               | Development assistance for health | Hospital         | Web-Info        | Overseas Embassy    | China signed the contract to fund Comoros with hospital construction                                          |
| <a href="http://gw.mofcom.gov.cn/article/jmxw/201308/20130800252081.shtml">http://gw.mofcom.gov.cn/article/jmxw/201308/20130800252081.shtml</a>               | Development assistance for health | Hospital         | Web-Info        | Overseas Embassy    | The Guinea-Bissau National Medical School Project is going smoothly and is predicted to finish in December    |
| <a href="http://ke.mofcom.gov.cn/article/waimao/201110/20111007771499.shtml">http://ke.mofcom.gov.cn/article/waimao/201110/20111007771499.shtml</a>           | Development assistance for health | Hospital         | Web-Info        | Overseas Embassy    | The launching ceremony of Medical School of Kenyatta University was held in Kenya                             |
| <a href="http://ke.mofcom.gov.cn/article/waimao/201308/20130800249621.shtml">http://ke.mofcom.gov.cn/article/waimao/201308/20130800249621.shtml</a>           | Development assistance for health | Hospital         | Web-Info        | Overseas Embassy    | China funded hospital renovation and expansion project officially started in Kenya                            |
| <a href="http://cm.mofcom.gov.cn/article/todayheader/201304/20130400079650.shtml">http://cm.mofcom.gov.cn/article/todayheader/201304/20130400079650.shtml</a> | Development assistance for health | Hospital         | Web-Info        | Overseas Embassy    | Gao Yongqin counselor visited Douala Women and Children Hospital Project                                      |
| <a href="http://cg.mofcom.gov.cn/article/todayheader/201310/20131000370088.shtml">http://cg.mofcom.gov.cn/article/todayheader/201310/20131000370088.shtml</a> | Development assistance for health | Hospital         | Web-Info        | Overseas Embassy    | Chairman Xi Jinping cut the ribbon on the completion ceremony of Friendship Hospital in the Republic of Congo |

| Source                                                                                                                                                        | Topic                             | Sub-topic | Category            | Organization                    | Information title                                                                       |
|---------------------------------------------------------------------------------------------------------------------------------------------------------------|-----------------------------------|-----------|---------------------|---------------------------------|-----------------------------------------------------------------------------------------|
| <a href="http://ao.mofcom.gov.cn/article/sqfb/201307/20130700204726.shtml">http://ao.mofcom.gov.cn/article/sqfb/201307/20130700204726.shtml</a>               | Development assistance for health | Hospital  | Web-Info            | Overseas Embassy                | The biggest hospital construction project successfully completed in Angola              |
| <a href="http://mu.mofcom.gov.cn/article/todayheader/201310/20131000369874.shtml">http://mu.mofcom.gov.cn/article/todayheader/201310/20131000369874.shtml</a> | Development assistance for health | Hospital  | Web-Info            | Overseas Embassy                | The Mauritian Minister of Health visited Victoria Hospital Project                      |
| <a href="http://kg.mofcom.gov.cn/article/zqzj/201307/20130700183809.shtml">http://kg.mofcom.gov.cn/article/zqzj/201307/20130700183809.shtml</a>               | Development assistance for health | Hospital  | Web-Info            | Overseas Embassy                | The completion ceremony of China funded National Hospital project was held in Kyrgyz    |
| <a href="http://ye.mofcom.gov.cn/article/jmxw/201307/20130700188658.shtml">http://ye.mofcom.gov.cn/article/jmxw/201307/20130700188658.shtml</a>               | Development assistance for health | Hospital  | Web-Info            | Overseas Embassy                | The handover ceremony of China funded Friendship Hospital in Yemen was held in Sana'a   |
| <a href="http://ws.mofcom.gov.cn/article/jmxw/201307/20130700181180.shtml">http://ws.mofcom.gov.cn/article/jmxw/201307/20130700181180.shtml</a>               | Development assistance for health | Hospital  | Web-Info            | Overseas Embassy                | The completion and handover ceremony of China funded Samoa Medical Center was held      |
| <a href="http://tt.mofcom.gov.cn/article/jmxw/201212/20121208468477.shtml">http://tt.mofcom.gov.cn/article/jmxw/201212/20121208468477.shtml</a>               | Development assistance for health | Hospital  | Web-Info            | Overseas Embassy                | China funded Trinidad and Tobago Children's Hospital project officially launched        |
| <a href="http://ne.mofcom.gov.cn/article/jmxw/201310/20131000333988.shtml">http://ne.mofcom.gov.cn/article/jmxw/201310/20131000333988.shtml</a>               | Development assistance for health | Hospital  | Web-Info            | Overseas Embassy                | The launching ceremony of China funded Niger General Hospital was held in Niamey        |
| <a href="http://news.xinhuanet.com/newscenter/2006-06/21/content_4724521.htm">http://news.xinhuanet.com/newscenter/2006-06/21/content_4724521.htm</a>         | Development assistance for health | Hospital  | Web-Info            | Press                           | Long distance separates no bosom friends——Premier Wen Jiabao visited Talangaï Hospital  |
| 1981 China Trade and External Economic Statistical Yearbook                                                                                                   | Development assistance for health | Hospital  | Yearbook statistics | Ministry of Commerce of the PRC | The construction of China funded projects and the provision of equipment supply in 1980 |
| 1982 China Trade and External Economic Statistical Yearbook                                                                                                   | Development assistance for health | Hospital  | Yearbook statistics | Ministry of Commerce of the PRC | The construction of China funded projects and the provision of equipment supply in 1981 |

| <b>Source</b>                                               | <b>Topic</b>                      | <b>Sub-topic</b> | <b>Category</b>     | <b>Organization</b>             | <b>Information title</b>                                                                |
|-------------------------------------------------------------|-----------------------------------|------------------|---------------------|---------------------------------|-----------------------------------------------------------------------------------------|
| 1983 China Trade and External Economic Statistical Yearbook | Development assistance for health | Hospital         | Yearbook statistics | Ministry of Commerce of the PRC | The construction of China funded projects and the provision of equipment supply in 1982 |
| 1984 China Trade and External Economic Statistical Yearbook | Development assistance for health | Hospital         | Yearbook statistics | Ministry of Commerce of the PRC | The construction of China funded projects and the provision of equipment supply in 1983 |
| 1985 China Trade and External Economic Statistical Yearbook | Development assistance for health | Hospital         | Yearbook statistics | Ministry of Commerce of the PRC | The construction of China funded projects and the provision of equipment supply in 1984 |
| 1986 China Trade and External Economic Statistical Yearbook | Development assistance for health | Hospital         | Yearbook statistics | Ministry of Commerce of the PRC | The construction of China funded projects and the provision of equipment supply in 1985 |
| 1987 China Trade and External Economic Statistical Yearbook | Development assistance for health | Hospital         | Yearbook statistics | Ministry of Commerce of the PRC | The construction of China funded projects and the provision of equipment supply in 1986 |
| 1988 China Trade and External Economic Statistical Yearbook | Development assistance for health | Hospital         | Yearbook statistics | Ministry of Commerce of the PRC | The construction of China funded projects and the provision of equipment supply in 1987 |
| 1989 China Trade and External Economic Statistical Yearbook | Development assistance for health | Hospital         | Yearbook statistics | Ministry of Commerce of the PRC | The construction of China funded projects and the provision of equipment supply in 1988 |
| 1990 China Trade and External Economic Statistical Yearbook | Development assistance for health | Hospital         | Yearbook statistics | Ministry of Commerce of the PRC | The construction of China funded projects and the provision of equipment supply in 1989 |

| <b>Source</b>                                                  | <b>Topic</b>                      | <b>Sub-topic</b> | <b>Category</b>     | <b>Organization</b>             | <b>Information title</b>                                                                |
|----------------------------------------------------------------|-----------------------------------|------------------|---------------------|---------------------------------|-----------------------------------------------------------------------------------------|
| 1991 China Trade and External Economic Statistical Yearbook    | Development assistance for health | Hospital         | Yearbook statistics | Ministry of Commerce of the PRC | The construction of China funded projects and the provision of equipment supply in 1990 |
| 1992 China Trade and External Economic Statistical Yearbook    | Development assistance for health | Hospital         | Yearbook statistics | Ministry of Commerce of the PRC | The construction of China funded projects and the provision of equipment supply in 1991 |
| 1993 China Trade and External Economic Statistical Yearbook    | Development assistance for health | Hospital         | Yearbook statistics | Ministry of Commerce of the PRC | The construction of China funded projects and the provision of equipment supply in 1992 |
| 1994 China Trade and External Economic Statistical Yearbook    | Development assistance for health | Hospital         | Yearbook statistics | Ministry of Commerce of the PRC | The construction of China funded projects and the provision of equipment supply in 1993 |
| 1995 China Trade and External Economic Statistical Yearbook    | Development assistance for health | Hospital         | Yearbook statistics | Ministry of Commerce of the PRC | The construction of China funded projects and the provision of equipment supply in 1994 |
| 1995/96 China Trade and External Economic Statistical Yearbook | Development assistance for health | Hospital         | Yearbook statistics | Ministry of Commerce of the PRC | The construction of China funded projects and the provision of equipment supply in 1995 |
| 1996/97 China Trade and External Economic Statistical Yearbook | Development assistance for health | Hospital         | Yearbook statistics | Ministry of Commerce of the PRC | The construction of China funded projects and the provision of equipment supply in 1996 |
| 1997/98 China Trade and External Economic Statistical Yearbook | Development assistance for health | Hospital         | Yearbook statistics | Ministry of Commerce of the PRC | The construction of China funded projects and the provision of equipment supply in 1997 |

| <b>Source</b>                                                  | <b>Topic</b>                      | <b>Sub-topic</b> | <b>Category</b>     | <b>Organization</b>             | <b>Information title</b>                                                                |
|----------------------------------------------------------------|-----------------------------------|------------------|---------------------|---------------------------------|-----------------------------------------------------------------------------------------|
| 1998/99 China Trade and External Economic Statistical Yearbook | Development assistance for health | Hospital         | Yearbook statistics | Ministry of Commerce of the PRC | The construction of China funded projects and the provision of equipment supply in 1998 |
| 2000 China Trade and External Economic Statistical Yearbook    | Development assistance for health | Hospital         | Yearbook statistics | Ministry of Commerce of the PRC | The construction of China funded projects and the provision of equipment supply in 1999 |
| 2001 China Trade and External Economic Statistical Yearbook    | Development assistance for health | Hospital         | Yearbook statistics | Ministry of Commerce of the PRC | The construction of China funded projects and the provision of equipment supply in 2000 |
| 2002 China Trade and External Economic Statistical Yearbook    | Development assistance for health | Hospital         | Yearbook statistics | Ministry of Commerce of the PRC | The construction of China funded projects and the provision of equipment supply in 2001 |
| 2003 China Trade and External Economic Statistical Yearbook    | Development assistance for health | Hospital         | Yearbook statistics | Ministry of Commerce of the PRC | The construction of China funded projects and the provision of equipment supply in 2002 |
| 2004 China Trade and External Economic Statistical Yearbook    | Development assistance for health | Hospital         | Yearbook statistics | Ministry of Commerce of the PRC | The construction of China funded projects and the provision of equipment supply in 2003 |
| 2005 China Trade and External Economic Statistical Yearbook    | Development assistance for health | Hospital         | Yearbook statistics | Ministry of Commerce of the PRC | The construction of China funded projects and the provision of equipment supply in 2004 |
| 2006 China Trade and External Economic Statistical Yearbook    | Development assistance for health | Hospital         | Yearbook statistics | Ministry of Commerce of the PRC | The construction of China funded projects and the provision of equipment supply in 2005 |

| <b>Source</b>                                               | <b>Topic</b>                      | <b>Sub-topic</b> | <b>Category</b>     | <b>Organization</b>             | <b>Information title</b>                                                                |
|-------------------------------------------------------------|-----------------------------------|------------------|---------------------|---------------------------------|-----------------------------------------------------------------------------------------|
| 2007 China Trade and External Economic Statistical Yearbook | Development assistance for health | Hospital         | Yearbook statistics | Ministry of Commerce of the PRC | The construction of China funded projects and the provision of equipment supply in 2006 |
| 2008 China Trade and External Economic Statistical Yearbook | Development assistance for health | Hospital         | Yearbook statistics | Ministry of Commerce of the PRC | The construction of China funded projects and the provision of equipment supply in 2007 |
| 2009 China Trade and External Economic Statistical Yearbook | Development assistance for health | Hospital         | Yearbook statistics | Ministry of Commerce of the PRC | The construction of China funded projects and the provision of equipment supply in 2008 |
| 2010 China Trade and External Economic Statistical Yearbook | Development assistance for health | Hospital         | Yearbook statistics | Ministry of Commerce of the PRC | The construction of China funded projects and the provision of equipment supply in 2009 |
| 2003 China Commerce Yearbook                                | Development assistance for health | Hospital         | Yearbook statistics | Ministry of Commerce of the PRC | The construction of China funded projects and the provision of equipment supply in 2002 |
| 2004 China Commerce Yearbook                                | Development assistance for health | Hospital         | Yearbook statistics | Ministry of Commerce of the PRC | The construction of China funded projects and the provision of equipment supply in 2003 |
| 2005 China Commerce Yearbook                                | Development assistance for health | Hospital         | Yearbook statistics | Ministry of Commerce of the PRC | The construction of China funded projects and the provision of equipment supply in 2004 |
| 2006 China Commerce Yearbook                                | Development assistance for health | Hospital         | Yearbook statistics | Ministry of Commerce of the PRC | The construction of China funded projects and the provision of equipment supply in 2005 |

| <b>Source</b>                                                                                                                                                                                                                   | <b>Topic</b>                      | <b>Sub-topic</b>       | <b>Category</b> | <b>Organization</b>                                       | <b>Information title</b>                                                                                                                                |
|---------------------------------------------------------------------------------------------------------------------------------------------------------------------------------------------------------------------------------|-----------------------------------|------------------------|-----------------|-----------------------------------------------------------|---------------------------------------------------------------------------------------------------------------------------------------------------------|
| Interview with the representative of the Department of Health of Inner Mongolia                                                                                                                                                 | Development assistance for health | Medicine and equipment | Interview       | National Health and Family Planning Commission of the PRC | Interview with the representative of the Department of Health of Inner Mongolia                                                                         |
| <a href="http://www.holleycotec.com/cn/News34-45-67.aspx">http://www.holleycotec.com/cn/News34-45-67.aspx</a>                                                                                                                   | Development assistance for health | Medicine and equipment | Web-Info        | Chinese Company                                           | Holley Cotec donated duo-cotectxin to Chinese embassy in the republic of Equatorial Guinea                                                              |
| <a href="http://www.sino-pharm.com/NewsContent/3020.html">http://www.sino-pharm.com/NewsContent/3020.html</a>                                                                                                                   | Development assistance for health | Medicine and equipment | Web-Info        | Chinese Company                                           | The China- Guinea Malaria Control Center opening ceremony was held smoothly                                                                             |
| <a href="http://www.fmprc.gov.cn/mfa_chn/gjhdq_603914/gj_603916/fz_605026/1206_605076/1206x2_605096/t487008.shtml">http://www.fmprc.gov.cn/mfa_chn/gjhdq_603914/gj_603916/fz_605026/1206_605076/1206x2_605096/t487008.shtml</a> | Development assistance for health | Medicine and equipment | Web-Info        | Ministry of Foreign Affairs of the PRC                    | The Chinese Ambassador to Ethiopia, Lin Lin, represented Chinese government and handed over antimalarial drugs to Ethiopia                              |
| <a href="http://www.fmprc.gov.cn/mfa_chn/gjhdq_603914/gj_603916/fz_605026/1206_605220/1206x2_605240/t373665.shtml">http://www.fmprc.gov.cn/mfa_chn/gjhdq_603914/gj_603916/fz_605026/1206_605220/1206x2_605240/t373665.shtml</a> | Development assistance for health | Medicine and equipment | Web-Info        | Ministry of Foreign Affairs of the PRC                    | The Chinese Ambassador to Equatorial Guinea, Li Zhongliang, represented Chinese government and handed over antimalarial drugs to Equatorial Guinea      |
| <a href="http://www.fmprc.gov.cn/mfa_chn/zwbdt_602255/t844263.shtml">http://www.fmprc.gov.cn/mfa_chn/zwbdt_602255/t844263.shtml</a>                                                                                             | Development assistance for health | Medicine and equipment | Web-Info        | Ministry of Foreign Affairs of the PRC                    | The Chinese Ambassador to the Republic of Congo, Li Shuli, attended the handover ceremony of the antimalarial drugs from China to the Republic of Congo |
| <a href="http://www.fmprc.gov.cn/mfa_chn/wjdt_611265/zwbdt_611281/t43155">http://www.fmprc.gov.cn/mfa_chn/wjdt_611265/zwbdt_611281/t43155</a>                                                                                   | Development assistance for health | Medicine and           | Web-Info        | Ministry of Foreign Affairs of the PRC                    | The Chinese Ambassador to the Djibouti, Wang Xiaodu, attended the handover ceremony of the                                                              |



| Source                                                                                                                                                                                                                          | Topic                             | Sub-topic              | Category | Organization                           | Information title                                                                                                                                                      |
|---------------------------------------------------------------------------------------------------------------------------------------------------------------------------------------------------------------------------------|-----------------------------------|------------------------|----------|----------------------------------------|------------------------------------------------------------------------------------------------------------------------------------------------------------------------|
| 3.shtml                                                                                                                                                                                                                         |                                   | equipment              |          |                                        | antimalarial drugs from China to Djibouti                                                                                                                              |
| <a href="http://www.fmprc.gov.cn/mfa_chn/gjhdq_603914/gj_603916/fz_605026/1206_605438/1206x2_605458/t838054.shtml">http://www.fmprc.gov.cn/mfa_chn/gjhdq_603914/gj_603916/fz_605026/1206_605438/1206x2_605458/t838054.shtml</a> | Development assistance for health | Medicine and equipment | Web-Info | Ministry of Foreign Affairs of the PRC | The Chinese Ambassador to Equatorial Guinea, Zhao Lixing, attended the handover ceremony of the antimalarial drugs from China to Equatorial Guinea                     |
| <a href="http://wcm.fmprc.gov.cn/pub/chn/pds/wjdt/zwbd/t511943.htm">http://wcm.fmprc.gov.cn/pub/chn/pds/wjdt/zwbd/t511943.htm</a>                                                                                               | Development assistance for health | Medicine and equipment | Web-Info | Ministry of Foreign Affairs of the PRC | The Chinese Ambassador to Guinea Bissau, Yan Banghua, represented Chinese government and provided emergency medical aid to fight the cholera epidemic in Guinea Bissau |
| <a href="http://www.fmprc.gov.cn/mfa_chn/gjhdq_603914/gj_603916/fz_605026/1206_605486/1206x2_605506/t441028.shtml">http://www.fmprc.gov.cn/mfa_chn/gjhdq_603914/gj_603916/fz_605026/1206_605486/1206x2_605506/t441028.shtml</a> | Development assistance for health | Medicine and equipment | Web-Info | Ministry of Foreign Affairs of the PRC | The Chinese Ambassador to Ghana, Yu Wenzhe, attended the handover ceremony of the antimalarial drugs from China to Ghana                                               |
| <a href="http://www.fmprc.gov.cn/chn//pds/wjdt/zwbd/t432595.htm">http://www.fmprc.gov.cn/chn//pds/wjdt/zwbd/t432595.htm</a>                                                                                                     | Development assistance for health | Medicine and equipment | Web-Info | Ministry of Foreign Affairs of the PRC | The Chinese Ambassador to Kenya, Zhang Ming, attended the handover ceremony of the medicines from China to Kenya                                                       |
| <a href="http://www.fmprc.gov.cn/chn//pds/wjdt/zwbd/t570934.htm">http://www.fmprc.gov.cn/chn//pds/wjdt/zwbd/t570934.htm</a>                                                                                                     | Development assistance for health | Medicine and equipment | Web-Info | Ministry of Foreign Affairs of the PRC | The Chinese Ambassador to Mauritius, Bian Yanhua, attended the handover ceremony of medical equipment from China to the Mauritius hospital                             |
| <a href="http://www.fmprc.gov.cn/mfa_chn/gjhdq_603914/gj_603916/fz_605026/nsd_606018/nsdzwbd_606038/t579208.shtml">http://www.fmprc.gov.cn/mfa_chn/gjhdq_603914/gj_603916/fz_605026/nsd_606018/nsdzwbd_606038/t579208.shtml</a> | Development assistance for health | Medicine and equipment | Web-Info | Ministry of Foreign Affairs of the PRC | The medical equipment donated to Southern Sudan was successfully installed                                                                                             |

| <b>Source</b>                                                                                                                                               | <b>Topic</b>                      | <b>Sub-topic</b>       | <b>Category</b> | <b>Organization</b>                    | <b>Information title</b>                                                                                                                  |
|-------------------------------------------------------------------------------------------------------------------------------------------------------------|-----------------------------------|------------------------|-----------------|----------------------------------------|-------------------------------------------------------------------------------------------------------------------------------------------|
| <a href="http://www.mfa.gov.cn/chn//gxh/mtb/zwbdt759601.htm">http://www.mfa.gov.cn/chn//gxh/mtb/zwbdt759601.htm</a>                                         | Development assistance for health | Medicine and equipment | Web-Info        | Ministry of Foreign Affairs of the PRC | The Chinese Ambassador to Uganda, Sun Heping, represented Chinese government and donated the fourth batch of antimalarial drugs to Uganda |
| <a href="http://www.fmprc.gov.cn/mfa_chn/wjdt_611265/zwbdt_611281/t434684.shtml">http://www.fmprc.gov.cn/mfa_chn/wjdt_611265/zwbdt_611281/t434684.shtml</a> | Development assistance for health | Medicine and equipment | Web-Info        | Ministry of Foreign Affairs of the PRC | Chinese government donated medical equipment and medicines to the government of Chad                                                      |
| <a href="http://ao.mofcom.gov.cn/article/sqfb/200704/20070404550561.shtml">http://ao.mofcom.gov.cn/article/sqfb/200704/20070404550561.shtml</a>             | Development assistance for health | Medicine and equipment | Web-Info        | Ministry of Commerce of the PRC        | China officially handed over antimalarial drugs to Angola                                                                                 |
| <a href="http://www.mofcom.gov.cn/aarticle/i/jyjl/k/200808/20080805713711.html">http://www.mofcom.gov.cn/aarticle/i/jyjl/k/200808/20080805713711.html</a>   | Development assistance for health | Medicine and equipment | Web-Info        | Ministry of Commerce of the PRC        | China held handover ceremony of the medical equipment donating from China to Botswana                                                     |
| <a href="http://www.mofcom.gov.cn/aarticle/i/jyjl/k/201003/20100306814693.html">http://www.mofcom.gov.cn/aarticle/i/jyjl/k/201003/20100306814693.html</a>   | Development assistance for health | Medicine and equipment | Web-Info        | Ministry of Commerce of the PRC        | Chinese government signed the handover protocol of antimalarial drug with the government of Burundi                                       |
| <a href="http://bi.mofcom.gov.cn/aarticle/jmxw/200704/20070404616188.html">http://bi.mofcom.gov.cn/aarticle/jmxw/200704/20070404616188.html</a>             | Development assistance for health | Medicine and equipment | Web-Info        | Overseas Embassy                       | China held the handover ceremony of antimalarial drugs from China to Burundi                                                              |
| <a href="http://gq.mofcom.gov.cn/aarticle/jmxw/201002/20100206798821.html">http://gq.mofcom.gov.cn/aarticle/jmxw/201002/20100206798821.html</a>             | Development assistance for health | Medicine and equipment | Web-Info        | Overseas Embassy                       | Chinese government signed the protocol of providing antimalarial drug to Equatorial Guinea                                                |
| <a href="http://gq.mofcom.gov.cn/aarticle/jmxw/201008/20100807110170.html">http://gq.mofcom.gov.cn/aarticle/jmxw/201008/20100807110170.html</a>             | Development assistance for health | Medicine and equipment | Web-Info        | Overseas Embassy                       | Chinese government signed handover protocol of antimalarial drug with the government of Equatorial Guinea                                 |

| <b>Source</b>                                                                                                                                             | <b>Topic</b>                      | <b>Sub-topic</b>       | <b>Category</b> | <b>Organization</b> | <b>Information title</b>                                                                                                                            |
|-----------------------------------------------------------------------------------------------------------------------------------------------------------|-----------------------------------|------------------------|-----------------|---------------------|-----------------------------------------------------------------------------------------------------------------------------------------------------|
| <a href="http://tg.mofcom.gov.cn/aarticle/jmxw/201101/20110107351434.html">http://tg.mofcom.gov.cn/aarticle/jmxw/201101/20110107351434.html</a>           | Development assistance for health | Medicine and equipment | Web-Info        | Overseas Embassy    | Chinese government signed the protocol of providing antimalarial drug to Togo                                                                       |
| <a href="http://cg.china-embassy.org/chn/zgzh/gg/sgkx/t692958.htm">http://cg.china-embassy.org/chn/zgzh/gg/sgkx/t692958.htm</a>                           | Development assistance for health | Medicine and equipment | Web-Info        | Overseas Embassy    | The handover ceremony of the third load of antimalarial drugs from China to the Republic of Congo was held in Brazzaville                           |
| <a href="http://gh.mofcom.gov.cn/aarticle/jmxw/200907/20090706422793.html">http://gh.mofcom.gov.cn/aarticle/jmxw/200907/20090706422793.html</a>           | Development assistance for health | Medicine and equipment | Web-Info        | Overseas Embassy    | Chinese government signed the protocol of providing antimalarial drug to Ghana                                                                      |
| <a href="http://ga.mofcom.gov.cn/aarticle/jmxw/200703/20070304411601.html">http://ga.mofcom.gov.cn/aarticle/jmxw/200703/20070304411601.html</a>           | Development assistance for health | Medicine and equipment | Web-Info        | Overseas Embassy    | Chinese government donated antimalarial drugs to the government of Gabon                                                                            |
| <a href="http://ga.mofcom.gov.cn/aarticle/jmxw/201006/20100606959097.html">http://ga.mofcom.gov.cn/aarticle/jmxw/201006/20100606959097.html</a>           | Development assistance for health | Medicine and equipment | Web-Info        | Overseas Embassy    | Chinese government provided antimalarial drugs to Gabon                                                                                             |
| <a href="http://cm.mofcom.gov.cn/aarticle/zxhz/sbmy/200908/20090806483516.html">http://cm.mofcom.gov.cn/aarticle/zxhz/sbmy/200908/20090806483516.html</a> | Development assistance for health | Medicine and equipment | Web-Info        | Overseas Embassy    | China donated 2 million Yuan to Cameroon                                                                                                            |
| <a href="http://cm.mofcom.gov.cn/aarticle/jmxw/201107/20110707658607.html">http://cm.mofcom.gov.cn/aarticle/jmxw/201107/20110707658607.html</a>           | Development assistance for health | Medicine and equipment | Web-Info        | Overseas Embassy    | China and Cameroon signed important cooperative protocol                                                                                            |
| <a href="http://lr.china-embassy.org/chn/sgdhzx/t251842.htm">http://lr.china-embassy.org/chn/sgdhzx/t251842.htm</a>                                       | Development assistance for health | Medicine and equipment | Web-Info        | Overseas Embassy    | The Chinese Ambassador to Liberia, Lin Songtian, signed the protocol with the Liberian Ministry of Health of providing antimalarial drug to Liberia |

| <b>Source</b>                                                                                                                                             | <b>Topic</b>                      | <b>Sub-topic</b>       | <b>Category</b> | <b>Organization</b> | <b>Information title</b>                                                                                                                                            |
|-----------------------------------------------------------------------------------------------------------------------------------------------------------|-----------------------------------|------------------------|-----------------|---------------------|---------------------------------------------------------------------------------------------------------------------------------------------------------------------|
| <a href="http://mg.mofcom.gov.cn/aarticle/jmxw/200706/20070604788182.html">http://mg.mofcom.gov.cn/aarticle/jmxw/200706/20070604788182.html</a>           | Development assistance for health | Medicine and equipment | Web-Info        | Overseas Embassy    | The handover ceremony of antimalarial drugs from China to Madagascar was held in Madagascar                                                                         |
| <a href="http://mg.mofcom.gov.cn/aarticle/jmxw/200808/20080805724891.html">http://mg.mofcom.gov.cn/aarticle/jmxw/200808/20080805724891.html</a>           | Development assistance for health | Medicine and equipment | Web-Info        | Overseas Embassy    | China donated a batch of antimalarial drugs to Madagascar government                                                                                                |
| <a href="http://ml.mofcom.gov.cn/aarticle/zxhz/tzwl/200710/20071005184682.html">http://ml.mofcom.gov.cn/aarticle/zxhz/tzwl/200710/20071005184682.html</a> | Development assistance for health | Medicine and equipment | Web-Info        | Overseas Embassy    | The delegations from the Department of Health of Zhejiang Province, China vested Mali                                                                               |
| <a href="http://ml.mofcom.gov.cn/aarticle/zxhz/tzwl/200810/20081005848694.html">http://ml.mofcom.gov.cn/aarticle/zxhz/tzwl/200810/20081005848694.html</a> | Development assistance for health | Medicine and equipment | Web-Info        | Overseas Embassy    | The delegations from the Department of Health of Zhejiang Province, China vested Mali                                                                               |
| <a href="http://na.chineseembassy.org/chn/xwdt/t375080.htm">http://na.chineseembassy.org/chn/xwdt/t375080.htm</a>                                         | Development assistance for health | Medicine and equipment | Web-Info        | Overseas Embassy    | The delegations from the Department of Health of Zhejiang Province, China vested Namibia                                                                            |
| <a href="http://ne.mofcom.gov.cn/aarticle/jmxw/200804/20080405463809.html">http://ne.mofcom.gov.cn/aarticle/jmxw/200804/20080405463809.html</a>           | Development assistance for health | Medicine and equipment | Web-Info        | Overseas Embassy    | The handover ceremony of antimalarial drugs from China to Niger was held solemnly in Niger                                                                          |
| <a href="http://ke.mofcom.gov.cn/aarticle/waimao/200801/20080105359484.html">http://ke.mofcom.gov.cn/aarticle/waimao/200801/20080105359484.html</a>       | Development assistance for health | Medicine and equipment | Web-Info        | Overseas Embassy    | The Chinese Ambassador to Somalia, Zhang Ming, represented Chinese government and donated \$500,000 dollars' of humanitarian aid to Somalia                         |
| <a href="http://ke.chineseembassy.org/chn/xw/t618602.htm">http://ke.chineseembassy.org/chn/xw/t618602.htm</a>                                             | Development assistance for health | Medicine and equipment | Web-Info        | Overseas Embassy    | The Chinese Ambassador to Kenya, Deng Hongbo, attended the Transitional Federal Government of Somalia government cash assistance and antimalarial handover ceremony |

| Source                                                                                                                                                      | Topic                             | Sub-topic              | Category | Organization     | Information title                                                                                                                                                         |
|-------------------------------------------------------------------------------------------------------------------------------------------------------------|-----------------------------------|------------------------|----------|------------------|---------------------------------------------------------------------------------------------------------------------------------------------------------------------------|
| <a href="http://sd.mofcom.gov.cn/aarticle/jmxw/200806/20080605572825.html">http://sd.mofcom.gov.cn/aarticle/jmxw/200806/20080605572825.html</a>             | Development assistance for health | Medicine and equipment | Web-Info | Overseas Embassy | China officially handed over antimalarial drugs to Southern Sudan                                                                                                         |
| <a href="http://zanzibar.mofcom.gov.cn/aarticle/jmxw/201006/20100606958946.html">http://zanzibar.mofcom.gov.cn/aarticle/jmxw/201006/20100606958946.html</a> | Development assistance for health | Medicine and equipment | Web-Info | Overseas Embassy | China signed the protocol to provide the antimalarial drugs ( worth ¥1,000,000 Yuan) to Zanzibar and the protocol on Lange radio maintenance projects on 26th in Zanzibar |
| <a href="http://td.china-embassy.org/chn/xwdt/t453884.htm">http://td.china-embassy.org/chn/xwdt/t453884.htm</a>                                             | Development assistance for health | Medicine and equipment | Web-Info | Overseas Embassy | Chinese government donated a new batch of antimalarial drugs to Chad                                                                                                      |
| <a href="http://cf.mofcom.gov.cn/aarticle/jmxw/200708/20070804965652.html">http://cf.mofcom.gov.cn/aarticle/jmxw/200708/20070804965652.html</a>             | Development assistance for health | Medicine and equipment | Web-Info | Overseas Embassy | Chinese government handed over antimalarial drugs to the Central African government                                                                                       |
| <a href="http://cf.mofcom.gov.cn/aarticle/jmxw/201010/20101007212175.html">http://cf.mofcom.gov.cn/aarticle/jmxw/201010/20101007212175.html</a>             | Development assistance for health | Medicine and equipment | Web-Info | Overseas Embassy | Chinese government donated a batch of antimalarial drugs to the Central African government                                                                                |
| <a href="http://www.jkb.com.cn/document.jsp?docid=233217">http://www.jkb.com.cn/document.jsp?docid=233217</a>                                               | Development assistance for health | Medicine and equipment | Web-Info | Press            | The 30th anniversary of the Chinese medical teams in Botswana attracted people's attention                                                                                |
| <a href="http://news.163.com/09/1231/22/5RT6GU65000120GU.html">http://news.163.com/09/1231/22/5RT6GU65000120GU.html</a>                                     | Development assistance for health | Medicine and equipment | Web-Info | Press            | The handover ceremony of antimalarial drugs from China to Togo was held in Lome                                                                                           |
| <a href="http://news.cntv.cn/20110501/103122.shtml">http://news.cntv.cn/20110501/103122.shtml</a>                                                           | Development assistance for health | Medicine and equipment | Web-Info | Press            | The Chinese Ambassador to Cape Verde, Li Chunhua, secretly signed handover protocol of medical equipment with the Ministry of Foreign                                     |

| Source                                                                                                                                        | Topic                             | Sub-topic              | Category | Organization | Information title                                                                                     |
|-----------------------------------------------------------------------------------------------------------------------------------------------|-----------------------------------|------------------------|----------|--------------|-------------------------------------------------------------------------------------------------------|
|                                                                                                                                               |                                   |                        |          |              | Affairs of Cape Verde                                                                                 |
| <a href="http://www.gd.chinanews.com/2011-06-19/2/119770.shtml">http://www.gd.chinanews.com/2011-06-19/2/119770.shtml</a>                     | Development assistance for health | Medicine and equipment | Web-Info | Press        | China Foundation for Poverty Alleviation donated millions of Yuan to Equatorial Guinea                |
| <a href="http://www.gd.chinanews.com/2011-06-18/2/119742.shtml">http://www.gd.chinanews.com/2011-06-18/2/119742.shtml</a>                     | Development assistance for health | Medicine and equipment | Web-Info | Press        | China Foundation for Poverty Alleviation donated medical materials and equipment to Equatorial Guinea |
| <a href="http://news.sina.com.cn/w/2008-12-23/234814925115s.shtml">http://news.sina.com.cn/w/2008-12-23/234814925115s.shtml</a>               | Development assistance for health | Medicine and equipment | Web-Info | Press        | China donated 500 thousand dollar to Zimbabwe to fight the cholera epidemic                           |
| <a href="http://news.xinhuanet.com/world/2011-03/31/c_121252378.htm">http://news.xinhuanet.com/world/2011-03/31/c_121252378.htm</a>           | Development assistance for health | Medicine and equipment | Web-Info | Press        | Chinese government donated medical equipment to Zimbabwe                                              |
| <a href="http://news.xinhuanet.com/health/2007-10/25/content_6940355.htm">http://news.xinhuanet.com/health/2007-10/25/content_6940355.htm</a> | Development assistance for health | Medicine and equipment | Web-Info | Press        | China donated reproductive health equipment to Kenya                                                  |
| <a href="http://www.022net.com/2009/10-7/436046173192532.html">http://www.022net.com/2009/10-7/436046173192532.html</a>                       | Development assistance for health | Medicine and equipment | Web-Info | Press        | Chinese government donated a batch of antimalarial drugs worth 6 million yuan                         |
| <a href="http://news.xinhuanet.com/overseas/2010-07/29/c_12384894.htm">http://news.xinhuanet.com/overseas/2010-07/29/c_12384894.htm</a>       | Development assistance for health | Medicine and equipment | Web-Info | Press        | China donated reproductive medical equipment to Kenya                                                 |
| <a href="http://news.sina.com.cn/w/2006-05-16/13238940169s.shtml">http://news.sina.com.cn/w/2006-05-16/13238940169s.shtml</a>                 | Development assistance for health | Medicine and           | Web-Info | Press        | China donated antimalarial drugs to Côte d'Ivoire                                                     |

| Source                                                                                                                                                              | Topic                             | Sub-topic              | Category | Organization | Information title                                                                                                   |
|---------------------------------------------------------------------------------------------------------------------------------------------------------------------|-----------------------------------|------------------------|----------|--------------|---------------------------------------------------------------------------------------------------------------------|
|                                                                                                                                                                     |                                   | equipment              |          |              |                                                                                                                     |
| <a href="http://news.qq.com/a/20070629/001437.htm">http://news.qq.com/a/20070629/001437.htm</a>                                                                     | Development assistance for health | Medicine and equipment | Web-Info | Press        | China donated a batch of antimalarial drugs to Côte d'Ivoire                                                        |
| <a href="http://info.pharm.hc360.com/2008/10/060958116368.shtml">http://info.pharm.hc360.com/2008/10/060958116368.shtml</a>                                         | Development assistance for health | Medicine and equipment | Web-Info | Press        | Kunming Pharmaceutical Group held a press conference on the new anti-malaria drugs and donated the drugs to Liberia |
| <a href="http://www.mofcom.gov.cn/aarticle/i/jyjlk/201101/20110107382436.html">http://www.mofcom.gov.cn/aarticle/i/jyjlk/201101/20110107382436.html</a>             | Development assistance for health | Medicine and equipment | Web-Info | Press        | China donated a batch of antimalarial drugs to Liberian government                                                  |
| <a href="http://news.xinhuanet.com/overseas/2010-02/02/content_12920260.htm">http://news.xinhuanet.com/overseas/2010-02/02/content_12920260.htm</a>                 | Development assistance for health | Medicine and equipment | Web-Info | Press        | China donated antimalarial drugs to Mauritania                                                                      |
| <a href="http://www.wjdaily.com/node/NewsWdmtkwj/2010-3-16/1031617616380207311.html">http://www.wjdaily.com/node/NewsWdmtkwj/2010-3-16/1031617616380207311.html</a> | Development assistance for health | Medicine and equipment | Web-Info | Press        | Wujiang City of Jiangsu Province, China donated medical elevator to Mauritania                                      |
| <a href="http://news.cntv.cn/20110701/112086.shtml">http://news.cntv.cn/20110701/112086.shtml</a>                                                                   | Development assistance for health | Medicine and equipment | Web-Info | Press        | The Chinese Ambassador to Niger, attended the donation ceremony of antimalarial drugs from China to Niger           |
| <a href="http://news.ifeng.com/mainland/detail_2010_12/08/3412123_0.shtml">http://news.ifeng.com/mainland/detail_2010_12/08/3412123_0.shtml</a>                     | Development assistance for health | Medicine and equipment | Web-Info | Press        | Commercial Office of Chinese Embassy in Nigeria held trainers' association                                          |
| <a href="http://news.china.com.cn/rollnews/2010-10/09/content_4627078.htm">http://news.china.com.cn/rollnews/2010-10/09/content_4627078.htm</a>                     | Development assistance for health | Medicine and           | Web-Info | Press        | China donated food and medicines to the flood areas of Kebbi State, Nigeria                                         |

| Source                                                                                                                                                | Topic                             | Sub-topic              | Category | Organization | Information title                                                                                           |
|-------------------------------------------------------------------------------------------------------------------------------------------------------|-----------------------------------|------------------------|----------|--------------|-------------------------------------------------------------------------------------------------------------|
|                                                                                                                                                       |                                   | equipment              |          |              |                                                                                                             |
| <a href="http://news.qq.com/a/20070907/003285.htm">http://news.qq.com/a/20070907/003285.htm</a>                                                       | Development assistance for health | Medicine and equipment | Web-Info | Press        | Hunan Province of China donated medical equipment worth 550 thousand Yuan to the Government of Sierra Leone |
| <a href="http://news.sohu.com/20070418/n249519868.shtml">http://news.sohu.com/20070418/n249519868.shtml</a>                                           | Development assistance for health | Medicine and equipment | Web-Info | Press        | China will send medical teams to Senegal                                                                    |
| <a href="http://finance.sina.com.cn/roll/20090123/11172646447.shtml">http://finance.sina.com.cn/roll/20090123/11172646447.shtml</a>                   | Development assistance for health | Medicine and equipment | Web-Info | Press        | The Chinese Ambassador to Senegal, Lu Shaye, represented China and donated antimalarial drugs to Senegal    |
| <a href="http://news.cntv.cn/20110112/101028.shtml">http://news.cntv.cn/20110112/101028.shtml</a>                                                     | Development assistance for health | Medicine and equipment | Web-Info | Press        | Chinese government donated a batch of new antimalarial drugs to Senegal government                          |
| <a href="http://news.xinhuanet.com/newscenter/2007-08/24/content_6599211.htm">http://news.xinhuanet.com/newscenter/2007-08/24/content_6599211.htm</a> | Development assistance for health | Medicine and equipment | Web-Info | Press        | The fifth batch of China's aid to Darfur, Sudan started shipping from Tianjin                               |
| <a href="http://world.people.com.cn/GB/11868771.html">http://world.people.com.cn/GB/11868771.html</a>                                                 | Development assistance for health | Medicine and equipment | Web-Info | Press        | The opening ceremony of China's aid to Darfur, Sudan was held                                               |
| <a href="http://news.ifeng.com/world/201003/0310_16_1569990.shtml">http://news.ifeng.com/world/201003/0310_16_1569990.shtml</a>                       | Development assistance for health | Medicine and equipment | Web-Info | Press        | China donated medical equipment to Sudan                                                                    |
| <a href="http://news.sohu.com/20080330/n255990522.shtml">http://news.sohu.com/20080330/n255990522.shtml</a>                                           | Development assistance for health | Medicine and           | Web-Info | Press        | China donated antimalarial drugs to Zanzibar                                                                |



| Source                                                                                                                                                                                          | Topic                             | Sub-topic              | Category | Organization                     | Information title                                                                                                                                                                                                       |
|-------------------------------------------------------------------------------------------------------------------------------------------------------------------------------------------------|-----------------------------------|------------------------|----------|----------------------------------|-------------------------------------------------------------------------------------------------------------------------------------------------------------------------------------------------------------------------|
|                                                                                                                                                                                                 |                                   | equipment              |          |                                  |                                                                                                                                                                                                                         |
| <a href="http://news.xinhuanet.com/world/2007-04/20/content_6001163.htm">http://news.xinhuanet.com/world/2007-04/20/content_6001163.htm</a>                                                     | Development assistance for health | Medicine and equipment | Web-Info | Press                            | China donated a batch of antimalarial drugs to Uganda                                                                                                                                                                   |
| <a href="http://news.qq.com/a/20071017/002112.htm">http://news.qq.com/a/20071017/002112.htm</a>                                                                                                 | Development assistance for health | Medicine and equipment | Web-Info | Press                            | China donated Uganda with medical equipment and medicines worth 20 million dollar                                                                                                                                       |
| <a href="http://finance.sina.com.cn/roll/20090517/00012844837.shtml">http://finance.sina.com.cn/roll/20090517/00012844837.shtml</a>                                                             | Development assistance for health | Medicine and equipment | Web-Info | Press                            | China's new antimalarial compound ARCO drug (for children use) come to the market in Uganda                                                                                                                             |
| <a href="http://news.qq.com/a/20100119/000343.htm">http://news.qq.com/a/20100119/000343.htm</a>                                                                                                 | Development assistance for health | Medicine and equipment | Web-Info | Press                            | China donated the antimalarial drugs to Uganda                                                                                                                                                                          |
| <a href="http://www.fjphb.gov.cn/show.aspx?ctlgid=531861&amp;id=77897">http://www.fjphb.gov.cn/show.aspx?ctlgid=531861&amp;id=77897</a>                                                         | Development assistance for health | Medicine and equipment | Web-Info | Provincial government of the PRC | The China- Guinea Malaria Control Center opening ceremony was held                                                                                                                                                      |
| <a href="http://www.jkb.com.cn/htmlpage/10/106232.htm?docid=106232&amp;cat=null&amp;sKeyword=null">http://www.jkb.com.cn/htmlpage/10/106232.htm?docid=106232&amp;cat=null&amp;sKeyword=null</a> | Development assistance for health | Medicine and equipment | Web-Info | Provincial government of the PRC | The director of the Department of Health of Hunan Province led the delegations condoled the 14 batch of medical team in Sierra Leone                                                                                    |
| <a href="http://www.jsph.net/art/2009/9/2/art_40_4894.html">http://www.jsph.net/art/2009/9/2/art_40_4894.html</a>                                                                               | Development assistance for health | Medicine and equipment | Web-Info | Provincial government of the PRC | The Jiangsu Provincial Vice Governor, He Quan, condoled the medical team in Zanzibar and attended the donation ceremony of medical equipment and medicines to Zanzibar held by the Chinese medical ophthalmology center |

| <b>Source</b>                                                                                                  | <b>Topic</b>                      | <b>Sub-topic</b> | <b>Category</b> | <b>Organization</b>                    | <b>Information title</b>                                                                |
|----------------------------------------------------------------------------------------------------------------|-----------------------------------|------------------|-----------------|----------------------------------------|-----------------------------------------------------------------------------------------|
| China's Foreign Aid                                                                                            | Development assistance for health | Overall          | Report          | Central government of the PRC          | China's foreign aid                                                                     |
| China-Africa Economic and Trade Cooperation (2013)                                                             | Development assistance for health | Overall          | Report          | Central government of the PRC          | Economic and trade cooperation between China and Africa (2013)                          |
| China-Africa Economic and Trade Cooperation (2010)                                                             | Development assistance for health | Overall          | Report          | Central government of the PRC          | Economic and trade cooperation between China and Africa (2010)                          |
| Forum on China-Africa cooperation Beijing action plan (2007-2009)                                              | Development assistance for health | Overall          | Report          | Ministry of Foreign Affairs of the PRC | FOCAC Beijing Action Plan (2007-2009)                                                   |
| Forum on China-Africa cooperation Sharm el-Sheikh action plan (2010-2012)                                      | Development assistance for health | Overall          | Report          | Ministry of Foreign Affairs of the PRC | FOCAC Sharm El Sheikh Action Plan (2010-2012)                                           |
| Implementation of the Follow-up Actions of the Beijing Summit of the Forum on China-Africa Cooperation         | Development assistance for health | Overall          | Report          | Ministry of Foreign Affairs of the PRC | The implementation of following action of China-Africa Cooperation Forum Beijing Summit |
| Implementation of the Follow-up Actions of the Sharm el-Sheikh Summit of the Forum on China-Africa Cooperation | Development assistance for health | Overall          | Report          | Ministry of Foreign Affairs of the PRC | The implementation of following action of FOCAC Sharm El Sheikh Action Plan             |
| Shifting Paradigm How the BRICS Are Reshaping Global Health and Development                                    | Development assistance for health | Overall          | Report          | Think tank                             | Paradigm shift: how BRICS countries influence global health and development             |

| <b>Source</b>                                                                                                                                                                 | <b>Topic</b>                      | <b>Sub-topic</b> | <b>Category</b>     | <b>Organization</b>                                       | <b>Information title</b>                                                                                                                                                    |
|-------------------------------------------------------------------------------------------------------------------------------------------------------------------------------|-----------------------------------|------------------|---------------------|-----------------------------------------------------------|-----------------------------------------------------------------------------------------------------------------------------------------------------------------------------|
| <a href="http://www.moh.gov.cn/gjhzs/s3590/201308/c12ded8cb50e406697f4545fd6aec74b.shtml">http://www.moh.gov.cn/gjhzs/s3590/201308/c12ded8cb50e406697f4545fd6aec74b.shtml</a> | Development assistance for health | TOTAL            | Web-Info            | National Health and Family Planning Commission of the PRC | Distributing materials in regular press conference in August: Introduction to foreign medical aid work                                                                      |
| China Customs Statistics Yearbook 2003                                                                                                                                        | Development assistance for health | TOTAL            | Yearbook statistics | China Customs                                             | China Customs Statistics Yearbook 2003: Table of Country (Region) total Import and Export Commodities Value; Table of Country (Region) Import and Export Commodities Volume |
| China Customs Statistics Yearbook 2004                                                                                                                                        | Development assistance for health | TOTAL            | Yearbook statistics | China Customs                                             | China Customs Statistics Yearbook 2004: Table of Country (Region) total Import and Export Commodities Value; Table of Country (Region) Import and Export Commodities Volume |
| China Customs Statistics Yearbook 2005                                                                                                                                        | Development assistance for health | TOTAL            | Yearbook statistics | China Customs                                             | China Customs Statistics Yearbook 2005: Table of Country (Region) total Import and Export Commodities Value; Table of Country (Region) Import and Export Commodities Volume |
| China Customs Statistics Yearbook 2006                                                                                                                                        | Development assistance for health | TOTAL            | Yearbook statistics | China Customs                                             | China Customs Statistics Yearbook 2006: Table of Country (Region) total Import and Export Commodities Value; Table of Country (Region) Import and Export Commodities Volume |
| China Customs Statistics Yearbook 2007                                                                                                                                        | Development assistance for health | TOTAL            | Yearbook statistics | China Customs                                             | China Customs Statistics Yearbook 2007: Table of Country (Region) total Import and Export Commodities Value; Table of Country (Region) Import and Export Commodities Volume |

| <b>Source</b>                                                          | <b>Topic</b>                      | <b>Sub-topic</b> | <b>Category</b>     | <b>Organization</b>             | <b>Information title</b>                                                                                                                                                    |
|------------------------------------------------------------------------|-----------------------------------|------------------|---------------------|---------------------------------|-----------------------------------------------------------------------------------------------------------------------------------------------------------------------------|
| China Customs Statistics Yearbook 2008                                 | Development assistance for health | TOTAL            | Yearbook statistics | China Customs                   | China Customs Statistics Yearbook 2008: Table of Country (Region) total Import and Export Commodities Value; Table of Country (Region) Import and Export Commodities Volume |
| China Customs Statistics Yearbook 2009                                 | Development assistance for health | TOTAL            | Yearbook statistics | China Customs                   | China Customs Statistics Yearbook 2009: Table of Country (Region) total Import and Export Commodities Value; Table of Country (Region) Import and Export Commodities Volume |
| China Customs Statistics Yearbook 2010                                 | Development assistance for health | TOTAL            | Yearbook statistics | China Customs                   | China Customs Statistics Yearbook 2010: Table of Country (Region) total Import and Export Commodities Value; Table of Country (Region) Import and Export Commodities Volume |
| China Customs Statistics Yearbook 2011                                 | Development assistance for health | TOTAL            | Yearbook statistics | China Customs                   | China Customs Statistics Yearbook 2011: Table of Country (Region) total Import and Export Commodities Value; Table of Country (Region) Import and Export Commodities Volume |
| China Customs Statistics Yearbook 2012                                 | Development assistance for health | TOTAL            | Yearbook statistics | China Customs                   | China Customs Statistics Yearbook 2012: Table of Country (Region) total Import and Export Commodities Value; Table of Country (Region) Import and Export Commodities Volume |
| 2011 Statistical Bulletin of China's Outward Foreign Direct Investment | Development assistance for health | TOTAL            | Yearbook statistics | Ministry of Commerce of the PRC | 2011 Statistical Bulletin of China's Outward Foreign Direct Investment                                                                                                      |

| Source                                                                                                                                                                              | Topic                             | Sub-topic       | Category | Organization                    | Information title                                                                                                |
|-------------------------------------------------------------------------------------------------------------------------------------------------------------------------------------|-----------------------------------|-----------------|----------|---------------------------------|------------------------------------------------------------------------------------------------------------------|
| <a href="http://jjhzj.mofcom.gov.cn/aarticle/feihuiyuan/ae/af/ak/200804/20080405498612.html">http://jjhzj.mofcom.gov.cn/aarticle/feihuiyuan/ae/af/ak/200804/20080405498612.html</a> | Development assistance for health | Training course | Web-Info | Ministry of Commerce of the PRC | Introduction of The Seminar for Senior Officials of Medical Institutions                                         |
| <a href="http://yws.mofcom.gov.cn/aarticle/b/s/cn/200903/20090306123379.html">http://yws.mofcom.gov.cn/aarticle/b/s/cn/200903/20090306123379.html</a>                               | Development assistance for health | Training course | Web-Info | Ministry of Commerce of the PRC | Implementation of the training project approved by Ministry of Commerce in 2009                                  |
| <a href="http://pxzx.mofcom.gov.cn/accessory/200910/1256179429823.xls">http://pxzx.mofcom.gov.cn/accessory/200910/1256179429823.xls</a>                                             | Development assistance for health | Training course | Web-Info | Ministry of Commerce of the PRC | Additional foreign aid training project schedule in 2009                                                         |
| <a href="http://pk2.mofcom.gov.cn/accessory/201002/1266812408268.pdf">http://pk2.mofcom.gov.cn/accessory/201002/1266812408268.pdf</a>                                               | Development assistance for health | Training course | Web-Info | Ministry of Commerce of the PRC | Training Programs for Pakistan in the First Half of 2010(Sponsored by Chinese Government)                        |
| <a href="http://www.china.com.cn/news/gongyi/2010-04/07/content_19763465.htm">http://www.china.com.cn/news/gongyi/2010-04/07/content_19763465.htm</a>                               | Development assistance for health | Training course | Web-Info | Ministry of Commerce of the PRC | National Red Cross disaster response capacity building seminar was held in Beijing                               |
| <a href="http://china-aibo.east.net/ywpxgl/ywpxmjcbd/gyyxb/265851.shtml">http://china-aibo.east.net/ywpxgl/ywpxmjcbd/gyyxb/265851.shtml</a>                                         | Development assistance for health | Training course | Web-Info | Ministry of Commerce of the PRC | Project description of the seminar on Food Safety Management for Officials from African National Training Course |
| <a href="http://china-aibo.east.net/ywpxgl/ywpxmjcbd/gyyxb/265463.shtml">http://china-aibo.east.net/ywpxgl/ywpxmjcbd/gyyxb/265463.shtml</a>                                         | Development assistance for health | Training course | Web-Info | Ministry of Commerce of the PRC | Project description of the Seminar for Medical Teaching Staff of Francophone Countries in Africa                 |
| <a href="http://china-aibo.east.net/ywpxgl/ywpxmjcbd/gyyxb/265144.shtml">http://china-aibo.east.net/ywpxgl/ywpxmjcbd/gyyxb/265144.shtml</a>                                         | Development assistance for health | Training course | Web-Info | Ministry of Commerce of the PRC | Project description of the Seminar for Medical Teaching Staff of English-speaking Countries in Africa            |

| <b>Source</b>                                                                                                                                 | <b>Topic</b>                      | <b>Sub-topic</b> | <b>Category</b> | <b>Organization</b>             | <b>Information title</b>                                                                                                              |
|-----------------------------------------------------------------------------------------------------------------------------------------------|-----------------------------------|------------------|-----------------|---------------------------------|---------------------------------------------------------------------------------------------------------------------------------------|
| <a href="http://china-aibo.east.net/ywpxgl/ywpxxmjcbd/gyyxb/265146.shtml">http://china-aibo.east.net/ywpxgl/ywpxxmjcbd/gyyxb/265146.shtml</a> | Development assistance for health | Training course  | Web-Info        | Ministry of Commerce of the PRC | Project Description of Seminar on First Aid of National Red Cross & Red Crescent Societies                                            |
| <a href="http://china-aibo.east.net/ywpxgl/ywpxxmjcbd/gyyxb/265150.shtml">http://china-aibo.east.net/ywpxgl/ywpxxmjcbd/gyyxb/265150.shtml</a> | Development assistance for health | Training course  | Web-Info        | Ministry of Commerce of the PRC | Project Description of Workshop on Malaria Control for Officials from Francophone Countries in Africa                                 |
| <a href="http://china-aibo.east.net/ywpxgl/ywpxxmjcbd/gyyxb/271062.shtml">http://china-aibo.east.net/ywpxgl/ywpxxmjcbd/gyyxb/271062.shtml</a> | Development assistance for health | Training course  | Web-Info        | Ministry of Commerce of the PRC | Project Description of Workshop on Infectious Disease Control for Officials from Arabism Countries                                    |
| <a href="http://china-aibo.east.net/ywpxgl/ywpxxmjcbd/gyyxb/265853.shtml">http://china-aibo.east.net/ywpxgl/ywpxxmjcbd/gyyxb/265853.shtml</a> | Development assistance for health | Training course  | Web-Info        | Ministry of Commerce of the PRC | Project Description of Seminar on Inspection & Quarantine for Officials of African Countries                                          |
| <a href="http://china-aibo.east.net/ywpxgl/ywpxxmjcbd/gyyxb/265885.shtml">http://china-aibo.east.net/ywpxgl/ywpxxmjcbd/gyyxb/265885.shtml</a> | Development assistance for health | Training course  | Web-Info        | Ministry of Commerce of the PRC | Project Description of Seminar for senior officials from health sector of francophone countries in Africa (Doctors from 30 hospitals) |
| <a href="http://china-aibo.east.net/ywpxgl/ywpxxmjcbd/gyyxb/265889.shtml">http://china-aibo.east.net/ywpxgl/ywpxxmjcbd/gyyxb/265889.shtml</a> | Development assistance for health | Training course  | Web-Info        | Ministry of Commerce of the PRC | Project Description of Seminar for senior officials from health sector of francophone countries in Africa (Doctors from 30 hospitals) |
| <a href="http://china-aibo.east.net/ywpxgl/ywpxxmjcbd/gyyxb/265910.shtml">http://china-aibo.east.net/ywpxgl/ywpxxmjcbd/gyyxb/265910.shtml</a> | Development assistance for health | Training course  | Web-Info        | Ministry of Commerce of the PRC | Project Description of Workshop on Inspection & Quarantine for Officials from Francophone Countries in Africa                         |
| <a href="http://china-aibo.east.net/ywpxgl/ywpxxmjcbd/gyyxb/265950.shtml">http://china-aibo.east.net/ywpxgl/ywpxxmjcbd/gyyxb/265950.shtml</a> | Development assistance for health | Training course  | Web-Info        | Ministry of Commerce of the PRC | Project description of Seminar on Traditional Chinese Medicine Technique for Developing English-speaking Countries                    |

| <b>Source</b>                                                                                                                                 | <b>Topic</b>                      | <b>Sub-topic</b> | <b>Category</b> | <b>Organization</b>             | <b>Information title</b>                                                                                                          |
|-----------------------------------------------------------------------------------------------------------------------------------------------|-----------------------------------|------------------|-----------------|---------------------------------|-----------------------------------------------------------------------------------------------------------------------------------|
| <a href="http://china-aibo.east.net/ywpxgl/ywpxxmjcbd/gyyxb/266154.shtml">http://china-aibo.east.net/ywpxgl/ywpxxmjcbd/gyyxb/266154.shtml</a> | Development assistance for health | Training course  | Web-Info        | Ministry of Commerce of the PRC | Project description of Seminar on Reproductive Health and Maternal & Infant Health Care Services for African Countries            |
| <a href="http://china-aibo.east.net/ywpxgl/ywpxxmjcbd/gyyxb/266148.shtml">http://china-aibo.east.net/ywpxgl/ywpxxmjcbd/gyyxb/266148.shtml</a> | Development assistance for health | Training course  | Web-Info        | Ministry of Commerce of the PRC | Project Description of Seminar on Foreign Investment Utilization and Industry Safety for Developing Countries                     |
| <a href="http://china-aibo.east.net/ywpxgl/ywpxxmjcbd/gyyxb/266102.shtml">http://china-aibo.east.net/ywpxgl/ywpxxmjcbd/gyyxb/266102.shtml</a> | Development assistance for health | Training course  | Web-Info        | Ministry of Commerce of the PRC | Project Description of Seminar on AIDS Prevention and Control for francophone African Countries                                   |
| <a href="http://china-aibo.east.net/ywpxgl/ywpxxmjcbd/gyyxb/266129.shtml">http://china-aibo.east.net/ywpxgl/ywpxxmjcbd/gyyxb/266129.shtml</a> | Development assistance for health | Training course  | Web-Info        | Ministry of Commerce of the PRC | Project Description of Seminar on pharmaceutical quality management in developing countries                                       |
| <a href="http://china-aibo.east.net/ywpxgl/ywpxxmjcbd/gyyxb/266143.shtml">http://china-aibo.east.net/ywpxgl/ywpxxmjcbd/gyyxb/266143.shtml</a> | Development assistance for health | Training course  | Web-Info        | Ministry of Commerce of the PRC | Project Description of Seminar on Traditional Chinese Medicine Management of Medical Organizations for Developing Countries       |
| <a href="http://china-aibo.east.net/ywpxgl/ywpxxmjcbd/gyyxb/266265.shtml">http://china-aibo.east.net/ywpxgl/ywpxxmjcbd/gyyxb/266265.shtml</a> | Development assistance for health | Training course  | Web-Info        | Ministry of Commerce of the PRC | Project Description of Seminar on Development and Maintenance of Medical Equipment for Developing Countries                       |
| <a href="http://china-aibo.east.net/ywpxgl/ywpxxmjcbd/gyyxb/266539.shtml">http://china-aibo.east.net/ywpxgl/ywpxxmjcbd/gyyxb/266539.shtml</a> | Development assistance for health | Training course  | Web-Info        | Ministry of Commerce of the PRC | Project Description of Seminar on AIDS Prevention and Care of National Red Cross & Red Crescent Societies of Developing Countries |
| <a href="http://china-aibo.east.net/ywpxgl/ywpxxmjcbd/gyyxb/266467.shtml">http://china-aibo.east.net/ywpxgl/ywpxxmjcbd/gyyxb/266467.shtml</a> | Development assistance for health | Training course  | Web-Info        | Ministry of Commerce of the PRC | Project Description of Seminar on Capacity Building of National Red Cross & Red Crescent Societies of Developing Countries        |

| <b>Source</b>                                                                                                                                 | <b>Topic</b>                      | <b>Sub-topic</b> | <b>Category</b> | <b>Organization</b>             | <b>Information title</b>                                                                                                              |
|-----------------------------------------------------------------------------------------------------------------------------------------------|-----------------------------------|------------------|-----------------|---------------------------------|---------------------------------------------------------------------------------------------------------------------------------------|
| <a href="http://china-aibo.east.net/ywpxgl/ywpxxmjcbd/gyyxb/266080.shtml">http://china-aibo.east.net/ywpxgl/ywpxxmjcbd/gyyxb/266080.shtml</a> | Development assistance for health | Training course  | Web-Info        | Ministry of Commerce of the PRC | Project Description of Seminar on Inspection & Quarantine for Officials of Latin American Countries                                   |
| <a href="http://china-aibo.east.net/ywpxgl/ywpxxmjcbd/gyyxb/265147.shtml">http://china-aibo.east.net/ywpxgl/ywpxxmjcbd/gyyxb/265147.shtml</a> | Development assistance for health | Training course  | Web-Info        | Ministry of Commerce of the PRC | Project Description of Seminar on Inspection & Quarantine for Officials of CIS Countries                                              |
| <a href="http://china-aibo.east.net/ywpxgl/ywpxxmjcbd/gyyxb/266212.shtml">http://china-aibo.east.net/ywpxgl/ywpxxmjcbd/gyyxb/266212.shtml</a> | Development assistance for health | Training course  | Web-Info        | Ministry of Commerce of the PRC | Project Description of Seminar on Inspection & Quarantine for Officials of Arab Countries                                             |
| <a href="http://china-aibo.east.net/ywpxgl/ywpxxmjcbd/gyyxb/265861.shtml">http://china-aibo.east.net/ywpxgl/ywpxxmjcbd/gyyxb/265861.shtml</a> | Development assistance for health | Training course  | Web-Info        | Ministry of Commerce of the PRC | Project Description of Seminar on Food Safety Management for Asian Developing Countries                                               |
| <a href="http://china-aibo.east.net/ywpxgl/ywpxxmjcbd/gyyxb/266528.shtml">http://china-aibo.east.net/ywpxgl/ywpxxmjcbd/gyyxb/266528.shtml</a> | Development assistance for health | Training course  | Web-Info        | Ministry of Commerce of the PRC | Project Description of Seminar on Hospital Management in Francophone African Countries (II)                                           |
| <a href="http://china-aibo.east.net/ywpxgl/ywpxxmjcbd/gyyxb/267812.shtml">http://china-aibo.east.net/ywpxgl/ywpxxmjcbd/gyyxb/267812.shtml</a> | Development assistance for health | Training course  | Web-Info        | Ministry of Commerce of the PRC | Project Description of Seminar on HIV/AIDS Prevention and Care of National Red Cross & Red Crescent Societies of Developing Countries |
| <a href="http://china-aibo.east.net/ywpxgl/ywpxxmjcbd/gyyxb/267542.shtml">http://china-aibo.east.net/ywpxgl/ywpxxmjcbd/gyyxb/267542.shtml</a> | Development assistance for health | Training course  | Web-Info        | Ministry of Commerce of the PRC | Project Description of Seminar for Entry-Exit Health Quarantine Officials of Developing Countries                                     |
| <a href="http://china-aibo.east.net/ywpxgl/ywpxxmjcbd/gyyxb/266912.shtml">http://china-aibo.east.net/ywpxgl/ywpxxmjcbd/gyyxb/266912.shtml</a> | Development assistance for health | Training course  | Web-Info        | Ministry of Commerce of the PRC | Project Description of Seminar on Traditional Chinese Medicine Management for Developing Countries                                    |



| <b>Source</b>                                                                                                                                 | <b>Topic</b>                      | <b>Sub-topic</b> | <b>Category</b> | <b>Organization</b>             | <b>Information title</b>                                                                                                 |
|-----------------------------------------------------------------------------------------------------------------------------------------------|-----------------------------------|------------------|-----------------|---------------------------------|--------------------------------------------------------------------------------------------------------------------------|
| <a href="http://china-aibo.east.net/ywpxgl/ywpxxmjcbd/gyyxb/267188.shtml">http://china-aibo.east.net/ywpxgl/ywpxxmjcbd/gyyxb/267188.shtml</a> | Development assistance for health | Training course  | Web-Info        | Ministry of Commerce of the PRC | Project Description of Seminar on Food Safety Management for Russian-speaking Countries                                  |
| <a href="http://china-aibo.east.net/ywpxgl/ywpxxmjcbd/gyyxb/268767.shtml">http://china-aibo.east.net/ywpxgl/ywpxxmjcbd/gyyxb/268767.shtml</a> | Development assistance for health | Training course  | Web-Info        | Ministry of Commerce of the PRC | Project Description of Seminar on Food Safety Management for Latin American and Caribbean Countries                      |
| <a href="http://china-aibo.east.net/ywpxgl/ywpxxmjcbd/gyyxb/266820.shtml">http://china-aibo.east.net/ywpxgl/ywpxxmjcbd/gyyxb/266820.shtml</a> | Development assistance for health | Training course  | Web-Info        | Ministry of Commerce of the PRC | Project Description of Seminar on Food Safety Management for Developing Countries                                        |
| <a href="http://china-aibo.east.net/ywpxgl/ywpxxmjcbd/gyyxb/267586.shtml">http://china-aibo.east.net/ywpxgl/ywpxxmjcbd/gyyxb/267586.shtml</a> | Development assistance for health | Training course  | Web-Info        | Ministry of Commerce of the PRC | Projects Description of Seminar on Pharmaceutical Quality Management for Developing Countries                            |
| <a href="http://china-aibo.east.net/ywpxgl/ywpxxmjcbd/gyyxb/267605.shtml">http://china-aibo.east.net/ywpxgl/ywpxxmjcbd/gyyxb/267605.shtml</a> | Development assistance for health | Training course  | Web-Info        | Ministry of Commerce of the PRC | Project Description of Seminar for Presidents of Medical Institutions in Developing Countries                            |
| <a href="http://china-aibo.east.net/ywpxgl/ywpxxmjcbd/gyyxb/267584.shtml">http://china-aibo.east.net/ywpxgl/ywpxxmjcbd/gyyxb/267584.shtml</a> | Development assistance for health | Training course  | Web-Info        | Ministry of Commerce of the PRC | Project Description of Seminar for First-aid for Developing Countries                                                    |
| <a href="http://china-aibo.east.net/ywpxgl/ywpxxmjcbd/gyyxb/267407.shtml">http://china-aibo.east.net/ywpxgl/ywpxxmjcbd/gyyxb/267407.shtml</a> | Development assistance for health | Training course  | Web-Info        | Ministry of Commerce of the PRC | Project Description of Seminar on Maternal and Child Health Promotion for Officials from francophone Countries in Africa |
| <a href="http://china-aibo.east.net/ywpxgl/ywpxxmjcbd/gyyxb/267607.shtml">http://china-aibo.east.net/ywpxgl/ywpxxmjcbd/gyyxb/267607.shtml</a> | Development assistance for health | Training course  | Web-Info        | Ministry of Commerce of the PRC | Project Description of Workshop on Malaria Control for Officials of francophone Countries in Africa                      |

| <b>Source</b>                                                                                                                                 | <b>Topic</b>                      | <b>Sub-topic</b> | <b>Category</b> | <b>Organization</b>             | <b>Information title</b>                                                                                              |
|-----------------------------------------------------------------------------------------------------------------------------------------------|-----------------------------------|------------------|-----------------|---------------------------------|-----------------------------------------------------------------------------------------------------------------------|
| <a href="http://china-aibo.east.net/ywpxgl/ywpxxmjcbd/gyyxb/267233.shtml">http://china-aibo.east.net/ywpxgl/ywpxxmjcbd/gyyxb/267233.shtml</a> | Development assistance for health | Training course  | Web-Info        | Ministry of Commerce of the PRC | Project Description of Workshop on Malaria Control for Officials of francophone Countries in Africa                   |
| <a href="http://china-aibo.east.net/ywpxgl/ywpxxmjcbd/gyyxb/268191.shtml">http://china-aibo.east.net/ywpxgl/ywpxxmjcbd/gyyxb/268191.shtml</a> | Development assistance for health | Training course  | Web-Info        | Ministry of Commerce of the PRC | Project Description of Seminar for Officials from Medical and Health Sector in francophone Countries in Africa        |
| <a href="http://china-aibo.east.net/ywpxgl/ywpxxmjcbd/gyyxb/266878.shtml">http://china-aibo.east.net/ywpxgl/ywpxxmjcbd/gyyxb/266878.shtml</a> | Development assistance for health | Training course  | Web-Info        | Ministry of Commerce of the PRC | Project Description of Seminar on Hospital Management for francophone Countries                                       |
| <a href="http://china-aibo.east.net/ywpxgl/ywpxxmjcbd/gyyxb/267413.shtml">http://china-aibo.east.net/ywpxgl/ywpxxmjcbd/gyyxb/267413.shtml</a> | Development assistance for health | Training course  | Web-Info        | Ministry of Commerce of the PRC | Project Description of Seminar on AIDS Prevention and Control for English-Speaking African Countries                  |
| <a href="http://china-aibo.east.net/ywpxgl/ywpxxmjcbd/gyyxb/267903.shtml">http://china-aibo.east.net/ywpxgl/ywpxxmjcbd/gyyxb/267903.shtml</a> | Development assistance for health | Training course  | Web-Info        | Ministry of Commerce of the PRC | Project Description of Seminar on AIDS Prevention and Control for francophone African Countries                       |
| <a href="http://china-aibo.east.net/ywpxgl/ywpxxmjcbd/gyyxb/267049.shtml">http://china-aibo.east.net/ywpxgl/ywpxxmjcbd/gyyxb/267049.shtml</a> | Development assistance for health | Training course  | Web-Info        | Ministry of Commerce of the PRC | Project Description of Seminar on Women and Children Health Care Promotion for African Countries                      |
| <a href="http://china-aibo.east.net/ywpxgl/ywpxxmjcbd/gyyxb/266871.shtml">http://china-aibo.east.net/ywpxgl/ywpxxmjcbd/gyyxb/266871.shtml</a> | Development assistance for health | Training course  | Web-Info        | Ministry of Commerce of the PRC | Project Description of Seminar for Rural Health Care Officials from English-speaking African Countries                |
| <a href="http://china-aibo.east.net/ywpxgl/ywpxxmjcbd/gyyxb/266869.shtml">http://china-aibo.east.net/ywpxgl/ywpxxmjcbd/gyyxb/266869.shtml</a> | Development assistance for health | Training course  | Web-Info        | Ministry of Commerce of the PRC | Project Description of The Training Program on Hospital Management for English-speaking Countries and Areas in Africa |

| <b>Source</b>                                                                                                                                 | <b>Topic</b>                      | <b>Sub-topic</b> | <b>Category</b> | <b>Organization</b>             | <b>Information title</b>                                                                                              |
|-----------------------------------------------------------------------------------------------------------------------------------------------|-----------------------------------|------------------|-----------------|---------------------------------|-----------------------------------------------------------------------------------------------------------------------|
| <a href="http://china-aibo.east.net/ywpxgl/ywpxxmjcbd/gyyxb/267759.shtml">http://china-aibo.east.net/ywpxgl/ywpxxmjcbd/gyyxb/267759.shtml</a> | Development assistance for health | Training course  | Web-Info        | Ministry of Commerce of the PRC | Project Description of Seminar for Officials from Medical and Health Sector in Arab Countries                         |
| <a href="http://china-aibo.east.net/ywpxgl/ywpxxmjcbd/gyyxb/267757.shtml">http://china-aibo.east.net/ywpxgl/ywpxxmjcbd/gyyxb/267757.shtml</a> | Development assistance for health | Training course  | Web-Info        | Ministry of Commerce of the PRC | Project Description of Seminar on Health Management--for Health Administrators in Developing Countries                |
| <a href="http://china-aibo.east.net/ywpxgl/ywpxxmjcbd/gyyxb/268193.shtml">http://china-aibo.east.net/ywpxgl/ywpxxmjcbd/gyyxb/268193.shtml</a> | Development assistance for health | Training course  | Web-Info        | Ministry of Commerce of the PRC | Project Description of Seminar for Rural Health Care Officials from Portuguese Countries                              |
| <a href="http://china-aibo.east.net/ywpxgl/ywpxxmjcbd/gyyxb/267568.shtml">http://china-aibo.east.net/ywpxgl/ywpxxmjcbd/gyyxb/267568.shtml</a> | Development assistance for health | Training course  | Web-Info        | Ministry of Commerce of the PRC | Project Description of Seminar on Anti-Malaria for Asian and African Countries                                        |
| <a href="http://china-aibo.east.net/ywpxgl/ywpxxmjcbd/gyyxb/266841.shtml">http://china-aibo.east.net/ywpxgl/ywpxxmjcbd/gyyxb/266841.shtml</a> | Development assistance for health | Training course  | Web-Info        | Ministry of Commerce of the PRC | Project Description of Seminar on Hospital Management for francophone countries in Africa (30 hospitals)              |
| <a href="http://china-aibo.east.net/ywpxgl/ywpxxmjcbd/gyyxb/266869.shtml">http://china-aibo.east.net/ywpxgl/ywpxxmjcbd/gyyxb/266869.shtml</a> | Development assistance for health | Training course  | Web-Info        | Ministry of Commerce of the PRC | Project Description of the Training Program on Hospital Management for English-speaking Countries and Areas in Africa |
| <a href="http://china-aibo.east.net/ywpxgl/ywpxxmjcbd/gyyxb/268773.shtml">http://china-aibo.east.net/ywpxgl/ywpxxmjcbd/gyyxb/268773.shtml</a> | Development assistance for health | Training course  | Web-Info        | Ministry of Commerce of the PRC | Project Description of Workshop for African Officials on Malaria Control                                              |
| <a href="http://china-aibo.east.net/ywpxgl/ywpxxmjcbd/gyyxb/266967.shtml">http://china-aibo.east.net/ywpxgl/ywpxxmjcbd/gyyxb/266967.shtml</a> | Development assistance for health | Training course  | Web-Info        | Ministry of Commerce of the PRC | Project Description of Seminar for Inspection and Quarantine Officials of English-speaking African Countries          |

| <b>Source</b>                                                                                                                                 | <b>Topic</b>                      | <b>Sub-topic</b> | <b>Category</b> | <b>Organization</b>             | <b>Information title</b>                                                                                                          |
|-----------------------------------------------------------------------------------------------------------------------------------------------|-----------------------------------|------------------|-----------------|---------------------------------|-----------------------------------------------------------------------------------------------------------------------------------|
| <a href="http://china-aibo.east.net/ywpxgl/ywpxxmjcbd/gyyxb/267495.shtml">http://china-aibo.east.net/ywpxgl/ywpxxmjcbd/gyyxb/267495.shtml</a> | Development assistance for health | Training course  | Web-Info        | Ministry of Commerce of the PRC | Project Description of Seminar for Inspection and Quarantine Officials of Arab Countries                                          |
| <a href="http://china-aibo.east.net/ywpxgl/ywpxxmjcbd/gyyxb/266802.shtml">http://china-aibo.east.net/ywpxgl/ywpxxmjcbd/gyyxb/266802.shtml</a> | Development assistance for health | Training course  | Web-Info        | Ministry of Commerce of the PRC | Project Description of Seminar for Inspection and Quarantine Officials of francophone African Countries                           |
| <a href="http://china-aibo.east.net/ywpxgl/ywpxxmjcbd/gyyxb/268775.shtml">http://china-aibo.east.net/ywpxgl/ywpxxmjcbd/gyyxb/268775.shtml</a> | Development assistance for health | Training course  | Web-Info        | Ministry of Commerce of the PRC | Project Description of Mother and Child Health Promotion for English-Speaking African Countries                                   |
| <a href="http://china-aibo.east.net/ywpxgl/ywpxxmjcbd/gyyxb/269146.shtml">http://china-aibo.east.net/ywpxgl/ywpxxmjcbd/gyyxb/269146.shtml</a> | Development assistance for health | Training course  | Web-Info        | Ministry of Commerce of the PRC | Project Description of Seminar on Capacity Building of National Red Cross & Red Crescent Societies in Asian and African Countries |
| <a href="http://china-aibo.east.net/ywpxgl/ywpxxmjcbd/gyyxb/269990.shtml">http://china-aibo.east.net/ywpxgl/ywpxxmjcbd/gyyxb/269990.shtml</a> | Development assistance for health | Training course  | Web-Info        | Ministry of Commerce of the PRC | Project Description of Seminar on Management for Latin American, Caribbean and South Asian Red Cross & Red Crescent Societies     |
| <a href="http://china-aibo.east.net/ywpxgl/ywpxxmjcbd/gyyxb/269224.shtml">http://china-aibo.east.net/ywpxgl/ywpxxmjcbd/gyyxb/269224.shtml</a> | Development assistance for health | Training course  | Web-Info        | Ministry of Commerce of the PRC | Project Description of Seminar on Rural Health Care towards Health Officials from African Countries                               |
| <a href="http://china-aibo.east.net/ywpxgl/ywpxxmjcbd/gyyxb/269234.shtml">http://china-aibo.east.net/ywpxgl/ywpxxmjcbd/gyyxb/269234.shtml</a> | Development assistance for health | Training course  | Web-Info        | Ministry of Commerce of the PRC | Project Description of Seminar on Hospital Management for English-speaking Countries in Africa (30 Hospitals)                     |
| <a href="http://china-aibo.east.net/ywpxgl/ywpxxmjcbd/gyyxb/269259.shtml">http://china-aibo.east.net/ywpxgl/ywpxxmjcbd/gyyxb/269259.shtml</a> | Development assistance for health | Training course  | Web-Info        | Ministry of Commerce of the PRC | Project Description of Seminar on Food Safety Management for Developing Countries                                                 |

| <b>Source</b>                                                                                                                                 | <b>Topic</b>                      | <b>Sub-topic</b> | <b>Category</b> | <b>Organization</b>             | <b>Information title</b>                                                                                    |
|-----------------------------------------------------------------------------------------------------------------------------------------------|-----------------------------------|------------------|-----------------|---------------------------------|-------------------------------------------------------------------------------------------------------------|
| <a href="http://china-aibo.east.net/ywpxgl/ywpxxmjcbd/gyyxb/269289.shtml">http://china-aibo.east.net/ywpxgl/ywpxxmjcbd/gyyxb/269289.shtml</a> | Development assistance for health | Training course  | Web-Info        | Ministry of Commerce of the PRC | Project Description of Seminar on Food Safety Management for Officials                                      |
| <a href="http://china-aibo.east.net/ywpxgl/ywpxxmjcbd/gyyxb/269285.shtml">http://china-aibo.east.net/ywpxgl/ywpxxmjcbd/gyyxb/269285.shtml</a> | Development assistance for health | Training course  | Web-Info        | Ministry of Commerce of the PRC | Project Description of Seminar on Food Safety Management for Officials from francophone Countries in Africa |
| <a href="http://china-aibo.east.net/ywpxgl/ywpxxmjcbd/gyyxb/269439.shtml">http://china-aibo.east.net/ywpxgl/ywpxxmjcbd/gyyxb/269439.shtml</a> | Development assistance for health | Training course  | Web-Info        | Ministry of Commerce of the PRC | Project Description of Seminar on Public Health Personnel for African francophone Countries                 |
| <a href="http://china-aibo.east.net/ywpxgl/ywpxxmjcbd/gyyxb/269440.shtml">http://china-aibo.east.net/ywpxgl/ywpxxmjcbd/gyyxb/269440.shtml</a> | Development assistance for health | Training course  | Web-Info        | Ministry of Commerce of the PRC | Project Description of Seminar on Public Health Personnel for African English - Speaking Countries          |
| <a href="http://china-aibo.east.net/ywpxgl/ywpxxmjcbd/gyyxb/269497.shtml">http://china-aibo.east.net/ywpxgl/ywpxxmjcbd/gyyxb/269497.shtml</a> | Development assistance for health | Training course  | Web-Info        | Ministry of Commerce of the PRC | Project Description of Seminar on Pharmaceutical Quality Management for Developing Countries                |
| <a href="http://china-aibo.east.net/ywpxgl/ywpxxmjcbd/gyyxb/269538.shtml">http://china-aibo.east.net/ywpxgl/ywpxxmjcbd/gyyxb/269538.shtml</a> | Development assistance for health | Training course  | Web-Info        | Ministry of Commerce of the PRC | Project Description of Seminar on Anti-Malaria for Asian and African Countries                              |
| <a href="http://china-aibo.east.net/ywpxgl/ywpxxmjcbd/gyyxb/269626.shtml">http://china-aibo.east.net/ywpxgl/ywpxxmjcbd/gyyxb/269626.shtml</a> | Development assistance for health | Training course  | Web-Info        | Ministry of Commerce of the PRC | Project Description of Seminar on Hospital Management for francophone countries in Africa ( 30 hospitals)   |
| <a href="http://china-aibo.east.net/ywpxgl/ywpxxmjcbd/gyyxb/269764.shtml">http://china-aibo.east.net/ywpxgl/ywpxxmjcbd/gyyxb/269764.shtml</a> | Development assistance for health | Training course  | Web-Info        | Ministry of Commerce of the PRC | Project Description of Seminar for Entry-Exit Health Quarantine Officials of Developing Countries           |

| <b>Source</b>                                                                                                                                 | <b>Topic</b>                      | <b>Sub-topic</b> | <b>Category</b> | <b>Organization</b>             | <b>Information title</b>                                                                                                                |
|-----------------------------------------------------------------------------------------------------------------------------------------------|-----------------------------------|------------------|-----------------|---------------------------------|-----------------------------------------------------------------------------------------------------------------------------------------|
| <a href="http://china-aibo.east.net/ywpxgl/ywpxxmjcbd/gyyxb/269906.shtml">http://china-aibo.east.net/ywpxgl/ywpxxmjcbd/gyyxb/269906.shtml</a> | Development assistance for health | Training course  | Web-Info        | Ministry of Commerce of the PRC | Project Description of Seminar on Pharmaceutical & Medical Investment and Cooperation for Francophone African Countries                 |
| <a href="http://china-aibo.east.net/ywpxgl/ywpxxmjcbd/gyyxb/269910.shtml">http://china-aibo.east.net/ywpxgl/ywpxxmjcbd/gyyxb/269910.shtml</a> | Development assistance for health | Training course  | Web-Info        | Ministry of Commerce of the PRC | Project Description of Seminar on Pharmaceutical & Medical Investment and Cooperation for Developing Countries                          |
| <a href="http://china-aibo.east.net/ywpxgl/ywpxxmjcbd/gyyxb/269938.shtml">http://china-aibo.east.net/ywpxgl/ywpxxmjcbd/gyyxb/269938.shtml</a> | Development assistance for health | Training course  | Web-Info        | Ministry of Commerce of the PRC | Project Description of Seminar on HIV/AIDS Prevention and Care of National Red Cross & Red Crescent Societies of Developing Countries   |
| <a href="http://china-aibo.east.net/ywpxgl/ywpxxmjcbd/gyyxb/269953.shtml">http://china-aibo.east.net/ywpxgl/ywpxxmjcbd/gyyxb/269953.shtml</a> | Development assistance for health | Training course  | Web-Info        | Ministry of Commerce of the PRC | Project Description of Seminar on Emergency First-aid Management of National Red Cross & Red Crescent Societies of Developing Countries |
| <a href="http://china-aibo.east.net/ywpxgl/ywpxxmjcbd/gyyxb/270072.shtml">http://china-aibo.east.net/ywpxgl/ywpxxmjcbd/gyyxb/270072.shtml</a> | Development assistance for health | Training course  | Web-Info        | Ministry of Commerce of the PRC | Project Description of Workshop for Officials in health departments of Portuguese-speaking Countries                                    |
| <a href="http://china-aibo.east.net/ywpxgl/ywpxxmjcbd/gyyxb/270437.shtml">http://china-aibo.east.net/ywpxgl/ywpxxmjcbd/gyyxb/270437.shtml</a> | Development assistance for health | Training course  | Web-Info        | Ministry of Commerce of the PRC | Project Description of Workshop for Officials in health departments of developing Countries                                             |
| <a href="http://china-aibo.east.net/ywpxgl/ywpxxmjcbd/gyyxb/270105.shtml">http://china-aibo.east.net/ywpxgl/ywpxxmjcbd/gyyxb/270105.shtml</a> | Development assistance for health | Training course  | Web-Info        | Ministry of Commerce of the PRC | Project Description of Seminar on Hospital Management for Asian Countries                                                               |
| <a href="http://china-aibo.east.net/ywpxgl/ywpxxmjcbd/gyyxb/270183.shtml">http://china-aibo.east.net/ywpxgl/ywpxxmjcbd/gyyxb/270183.shtml</a> | Development assistance for health | Training course  | Web-Info        | Ministry of Commerce of the PRC | Project Description of AIDS Prevention and Control for francophone African Countries                                                    |

| <b>Source</b>                                                                                                                                 | <b>Topic</b>                      | <b>Sub-topic</b> | <b>Category</b> | <b>Organization</b>             | <b>Information title</b>                                                                                        |
|-----------------------------------------------------------------------------------------------------------------------------------------------|-----------------------------------|------------------|-----------------|---------------------------------|-----------------------------------------------------------------------------------------------------------------|
| <a href="http://china-aibo.east.net/ywpxgl/ywpxxmjcbd/gyyxb/270181.shtml">http://china-aibo.east.net/ywpxgl/ywpxxmjcbd/gyyxb/270181.shtml</a> | Development assistance for health | Training course  | Web-Info        | Ministry of Commerce of the PRC | Project Description of Seminar on AIDS Prevention and Control for English-Speaking African Countries            |
| <a href="http://china-aibo.east.net/ywpxgl/ywpxxmjcbd/gyyxb/270299.shtml">http://china-aibo.east.net/ywpxgl/ywpxxmjcbd/gyyxb/270299.shtml</a> | Development assistance for health | Training course  | Web-Info        | Ministry of Commerce of the PRC | Project Description of Seminar for Inspection and Quarantine Officials of English-speaking African Countries    |
| <a href="http://china-aibo.east.net/ywpxgl/ywpxxmjcbd/gyyxb/270281.shtml">http://china-aibo.east.net/ywpxgl/ywpxxmjcbd/gyyxb/270281.shtml</a> | Development assistance for health | Training course  | Web-Info        | Ministry of Commerce of the PRC | Project Description of Seminar for Inspection and Quarantine Officials of Francophone African Countries         |
| <a href="http://china-aibo.east.net/ywpxgl/ywpxxmjcbd/gyyxb/270297.shtml">http://china-aibo.east.net/ywpxgl/ywpxxmjcbd/gyyxb/270297.shtml</a> | Development assistance for health | Training course  | Web-Info        | Ministry of Commerce of the PRC | Project Description of Seminar on Traditional Chinese Medicine Management for Developing Countries              |
| <a href="http://china-aibo.east.net/ywpxgl/ywpxxmjcbd/gyyxb/270295.shtml">http://china-aibo.east.net/ywpxgl/ywpxxmjcbd/gyyxb/270295.shtml</a> | Development assistance for health | Training course  | Web-Info        | Ministry of Commerce of the PRC | Project Description of Seminar on Mother and Child Health Promotion for English-Speaking African Countries      |
| <a href="http://china-aibo.east.net/ywpxgl/ywpxxmjcbd/gyyxb/270459.shtml">http://china-aibo.east.net/ywpxgl/ywpxxmjcbd/gyyxb/270459.shtml</a> | Development assistance for health | Training course  | Web-Info        | Ministry of Commerce of the PRC | Project Description of Seminar on Medicinal Plant for Developing Countries                                      |
| <a href="http://china-aibo.east.net/ywpxgl/ywpxxmjcbd/gyyxb/270439.shtml">http://china-aibo.east.net/ywpxgl/ywpxxmjcbd/gyyxb/270439.shtml</a> | Development assistance for health | Training course  | Web-Info        | Ministry of Commerce of the PRC | Project Description of Seminar on Health Management--for Health Administrators in Portuguese-speaking Countries |
| <a href="http://china-aibo.east.net/ywpxgl/ywpxxmjcbd/gyyxb/270437.shtml">http://china-aibo.east.net/ywpxgl/ywpxxmjcbd/gyyxb/270437.shtml</a> | Development assistance for health | Training course  | Web-Info        | Ministry of Commerce of the PRC | Project Description of Seminar on Health Management--for Health Administrators in Developing Countries          |

| <b>Source</b>                                                                                                                                             | <b>Topic</b>                      | <b>Sub-topic</b> | <b>Category</b> | <b>Organization</b>             | <b>Information title</b>                                                                                                 |
|-----------------------------------------------------------------------------------------------------------------------------------------------------------|-----------------------------------|------------------|-----------------|---------------------------------|--------------------------------------------------------------------------------------------------------------------------|
| <a href="http://china-aibo.east.net/ywpxgl/ywpxxmjcbd/gyyxb/270557.shtml">http://china-aibo.east.net/ywpxgl/ywpxxmjcbd/gyyxb/270557.shtml</a>             | Development assistance for health | Training course  | Web-Info        | Ministry of Commerce of the PRC | Project Description of Seminar on Population and Development for African Countries                                       |
| <a href="http://china-aibo.east.net/ywpxgl/ywpxxmjcbd/gyyxb/270784.shtml">http://china-aibo.east.net/ywpxgl/ywpxxmjcbd/gyyxb/270784.shtml</a>             | Development assistance for health | Training course  | Web-Info        | Ministry of Commerce of the PRC | Project Description of Mother and Child Health Promotion for francophone African Countries                               |
| <a href="http://china-aibo.east.net/ywpxgl/ywpxxmjcbd/gyyxb/270837.shtml">http://china-aibo.east.net/ywpxgl/ywpxxmjcbd/gyyxb/270837.shtml</a>             | Development assistance for health | Training course  | Web-Info        | Ministry of Commerce of the PRC | Project Description of Seminar for Inspection and Quarantine Officials of Latin American Countries                       |
| <a href="http://china-aibo.east.net/ywpxgl/ywpxxmjcbd/gyyxb/270843.shtml">http://china-aibo.east.net/ywpxgl/ywpxxmjcbd/gyyxb/270843.shtml</a>             | Development assistance for health | Training course  | Web-Info        | Ministry of Commerce of the PRC | Project Description of Seminar for Inspection and Quarantine Officials                                                   |
| <a href="http://china-aibo.east.net/ywpxgl/ywpxxmjcbd/gyyxb/271062.shtml">http://china-aibo.east.net/ywpxgl/ywpxxmjcbd/gyyxb/271062.shtml</a>             | Development assistance for health | Training course  | Web-Info        | Ministry of Commerce of the PRC | Project Description of Seminar for Inspection and Quarantine Officials of Arab Countries                                 |
| <a href="http://china-aibo.east.net/ywpxgl/ywpxxmjcbd/gyyxb/270775.shtml">http://china-aibo.east.net/ywpxgl/ywpxxmjcbd/gyyxb/270775.shtml</a>             | Development assistance for health | Training course  | Web-Info        | Ministry of Commerce of the PRC | Project Description of Population and Development for Francophone African Countries                                      |
| <a href="http://pxzx.mofcom.gov.cn/article/xfb/s/n/200910/20091006573827.shtml">http://pxzx.mofcom.gov.cn/article/xfb/s/n/200910/20091006573827.shtml</a> | Development assistance for health | Training course  | Web-Info        | Ministry of Commerce of the PRC | Project Description of Training Course on Food Safety Inspection Technology for Developing Countries                     |
| <a href="http://pxzx.mofcom.gov.cn/article/xfb/s/n/200904/20090406162472.shtml">http://pxzx.mofcom.gov.cn/article/xfb/s/n/200904/20090406162472.shtml</a> | Development assistance for health | Training course  | Web-Info        | Ministry of Commerce of the PRC | Project Description of Training Course on Health Care Technique of Traditional Chinese Medicine for Developing Countries |



| <b>Source</b>                                                                                                                                             | <b>Topic</b>                      | <b>Sub-topic</b> | <b>Category</b> | <b>Organization</b>             | <b>Information title</b>                                                                                             |
|-----------------------------------------------------------------------------------------------------------------------------------------------------------|-----------------------------------|------------------|-----------------|---------------------------------|----------------------------------------------------------------------------------------------------------------------|
| <a href="http://pxzx.mofcom.gov.cn/article/xfb/s/n/200906/20090606292747.shtml">http://pxzx.mofcom.gov.cn/article/xfb/s/n/200906/20090606292747.shtml</a> | Development assistance for health | Training course  | Web-Info        | Ministry of Commerce of the PRC | Project Description of Training Course on Chinese Acu.& Mox. towards African Countries                               |
| <a href="http://pxzx.mofcom.gov.cn/article/xfb/s/n/200907/20090706383557.shtml">http://pxzx.mofcom.gov.cn/article/xfb/s/n/200907/20090706383557.shtml</a> | Development assistance for health | Training course  | Web-Info        | Ministry of Commerce of the PRC | Project Description of Training Program on Nursing Techniques for Portuguese-speaking Countries in Africa(I)         |
| <a href="http://pxzx.mofcom.gov.cn/article/xfb/s/n/200906/20090606362001.shtml">http://pxzx.mofcom.gov.cn/article/xfb/s/n/200906/20090606362001.shtml</a> | Development assistance for health | Training course  | Web-Info        | Ministry of Commerce of the PRC | Project Description of Training course of Emergency medical technology and treatment of critically ill               |
| <a href="http://pxzx.mofcom.gov.cn/article/xfb/s/n/200906/20090606361290.shtml">http://pxzx.mofcom.gov.cn/article/xfb/s/n/200906/20090606361290.shtml</a> | Development assistance for health | Training course  | Web-Info        | Ministry of Commerce of the PRC | Project Description of Training Course on Malaria Control                                                            |
| <a href="http://pxzx.mofcom.gov.cn/article/xfb/s/n/200910/20091006567654.shtml">http://pxzx.mofcom.gov.cn/article/xfb/s/n/200910/20091006567654.shtml</a> | Development assistance for health | Training course  | Web-Info        | Ministry of Commerce of the PRC | Project Description of Training Course on Chinese Acu.& Mox. towards Developing Countries                            |
| <a href="http://pxzx.mofcom.gov.cn/article/xfb/s/n/200905/20090506243301.shtml">http://pxzx.mofcom.gov.cn/article/xfb/s/n/200905/20090506243301.shtml</a> | Development assistance for health | Training course  | Web-Info        | Ministry of Commerce of the PRC | Project Description of Training Course on High and New Technology of Biology and Medicine for Developing Countries   |
| <a href="http://pxzx.mofcom.gov.cn/article/xfb/s/n/200905/20090506262399.shtml">http://pxzx.mofcom.gov.cn/article/xfb/s/n/200905/20090506262399.shtml</a> | Development assistance for health | Training course  | Web-Info        | Ministry of Commerce of the PRC | Project Description of Training Course on Traditional Chinese Medicine Technique                                     |
| <a href="http://pxzx.mofcom.gov.cn/article/xfb/s/n/200907/20090706419475.shtml">http://pxzx.mofcom.gov.cn/article/xfb/s/n/200907/20090706419475.shtml</a> | Development assistance for health | Training course  | Web-Info        | Ministry of Commerce of the PRC | Project Description of The Training Course on Prevention and Treatment of Infectious Disease in Developing Countries |

| <b>Source</b>                                                                                                                                             | <b>Topic</b>                      | <b>Sub-topic</b> | <b>Category</b> | <b>Organization</b>             | <b>Information title</b>                                                                                              |
|-----------------------------------------------------------------------------------------------------------------------------------------------------------|-----------------------------------|------------------|-----------------|---------------------------------|-----------------------------------------------------------------------------------------------------------------------|
| <a href="http://pxzx.mofcom.gov.cn/article/xfb/s/n/200910/20091006573806.shtml">http://pxzx.mofcom.gov.cn/article/xfb/s/n/200910/20091006573806.shtml</a> | Development assistance for health | Training course  | Web-Info        | Ministry of Commerce of the PRC | Project Description of Training Course on Clinical Nursing for developing countries                                   |
| <a href="http://pxzx.mofcom.gov.cn/article/xfb/s/n/201003/20100306803929.shtml">http://pxzx.mofcom.gov.cn/article/xfb/s/n/201003/20100306803929.shtml</a> | Development assistance for health | Training course  | Web-Info        | Ministry of Commerce of the PRC | Project Description of The Training Course on Prevention and Treatment of Infectious Disease for Developing Countries |
| <a href="http://pxzx.mofcom.gov.cn/article/xfb/s/n/201003/20100306804121.shtml">http://pxzx.mofcom.gov.cn/article/xfb/s/n/201003/20100306804121.shtml</a> | Development assistance for health | Training course  | Web-Info        | Ministry of Commerce of the PRC | Project Description of Training Course on Food Safety Inspection Technology for African Countries                     |
| <a href="http://pxzx.mofcom.gov.cn/article/xfb/s/n/201003/20100306814270.shtml">http://pxzx.mofcom.gov.cn/article/xfb/s/n/201003/20100306814270.shtml</a> | Development assistance for health | Training course  | Web-Info        | Ministry of Commerce of the PRC | Project Description of the Training Course on Nursing for Developing Countries                                        |
| <a href="http://pxzx.mofcom.gov.cn/article/xfb/s/n/201003/20100306814010.shtml">http://pxzx.mofcom.gov.cn/article/xfb/s/n/201003/20100306814010.shtml</a> | Development assistance for health | Training course  | Web-Info        | Ministry of Commerce of the PRC | Project Description of Training course on pediatric critical diseases treatment for developing countries              |
| <a href="http://pxzx.mofcom.gov.cn/article/xfb/s/n/201003/20100306804083.shtml">http://pxzx.mofcom.gov.cn/article/xfb/s/n/201003/20100306804083.shtml</a> | Development assistance for health | Training course  | Web-Info        | Ministry of Commerce of the PRC | Project Description of Training Course on Clinical Application of Chinese Acupuncture & Moxibustion as well as Tuina  |
| <a href="http://pxzx.mofcom.gov.cn/article/xfb/s/n/201003/20100306844889.shtml">http://pxzx.mofcom.gov.cn/article/xfb/s/n/201003/20100306844889.shtml</a> | Development assistance for health | Training course  | Web-Info        | Ministry of Commerce of the PRC | Project Description of The Training Course on Minimally Invasive Surgical Techniques for Developing Countries         |
| <a href="http://china-aibo.east.net/ywpxgl/ywpxmjcbd/jspxb/265160.shtml">http://china-aibo.east.net/ywpxgl/ywpxmjcbd/jspxb/265160.shtml</a>               | Development assistance for health | Training course  | Web-Info        | Ministry of Commerce of the PRC | Project Description of the Training Course on Nursing for Portuguese-speaking Countries                               |

| <b>Source</b>                                                                                                                                 | <b>Topic</b>                      | <b>Sub-topic</b> | <b>Category</b> | <b>Organization</b>             | <b>Information title</b>                                                                                                     |
|-----------------------------------------------------------------------------------------------------------------------------------------------|-----------------------------------|------------------|-----------------|---------------------------------|------------------------------------------------------------------------------------------------------------------------------|
| <a href="http://china-aibo.east.net/ywpxgl/ywpxxmjcbd/jspxb/266543.shtml">http://china-aibo.east.net/ywpxgl/ywpxxmjcbd/jspxb/266543.shtml</a> | Development assistance for health | Training course  | Web-Info        | Ministry of Commerce of the PRC | Project Description of Seminar on Medical Technique and Equipment Usage in Hospital for Francophone Countries in Africa      |
| <a href="http://china-aibo.east.net/ywpxgl/ywpxxmjcbd/jspxb/266523.shtml">http://china-aibo.east.net/ywpxgl/ywpxxmjcbd/jspxb/266523.shtml</a> | Development assistance for health | Training course  | Web-Info        | Ministry of Commerce of the PRC | Project Description of Seminar on Medical Technique and Equipment Usage in Hospital for English-speaking Countries in Africa |
| <a href="http://china-aibo.east.net/ywpxgl/ywpxxmjcbd/jspxb/266482.shtml">http://china-aibo.east.net/ywpxgl/ywpxxmjcbd/jspxb/266482.shtml</a> | Development assistance for health | Training course  | Web-Info        | Ministry of Commerce of the PRC | Project Description of Training Course on Hospital Nursing Technique for English-Speaking Countries in Africa (II)           |
| <a href="http://china-aibo.east.net/ywpxgl/ywpxxmjcbd/jspxb/266390.shtml">http://china-aibo.east.net/ywpxgl/ywpxxmjcbd/jspxb/266390.shtml</a> | Development assistance for health | Training course  | Web-Info        | Ministry of Commerce of the PRC | Project Description of the Training Course on Nursing for Francophone Countries in Africa                                    |
| <a href="http://china-aibo.east.net/ywpxgl/ywpxxmjcbd/jspxb/265824.shtml">http://china-aibo.east.net/ywpxgl/ywpxxmjcbd/jspxb/265824.shtml</a> | Development assistance for health | Training course  | Web-Info        | Ministry of Commerce of the PRC | Project Description of Seminar on Traditional Medical Care Technique for Developing Countries                                |
| <a href="http://china-aibo.east.net/ywpxgl/ywpxxmjcbd/jspxb/265163.shtml">http://china-aibo.east.net/ywpxgl/ywpxxmjcbd/jspxb/265163.shtml</a> | Development assistance for health | Training course  | Web-Info        | Ministry of Commerce of the PRC | Project Description of Nursing Technique Training Course for English-Speaking Countries in Africa                            |
| <a href="http://china-aibo.east.net/ywpxgl/ywpxxmjcbd/jspxb/266582.shtml">http://china-aibo.east.net/ywpxgl/ywpxxmjcbd/jspxb/266582.shtml</a> | Development assistance for health | Training course  | Web-Info        | Ministry of Commerce of the PRC | Project Description of Training Course on Malaria Control for Demonstration centers in Africa                                |
| <a href="http://china-aibo.east.net/ywpxgl/ywpxxmjcbd/jspxb/266630.shtml">http://china-aibo.east.net/ywpxgl/ywpxxmjcbd/jspxb/266630.shtml</a> | Development assistance for health | Training course  | Web-Info        | Ministry of Commerce of the PRC | Project Description of Training Course on Malaria Diagnosis Technique and Equipment Usage for Anti-malaria Centers in Africa |

| <b>Source</b>                                                                                                                     | <b>Topic</b>                      | <b>Sub-topic</b> | <b>Category</b> | <b>Organization</b>             | <b>Information title</b>                                                                                                                                |
|-----------------------------------------------------------------------------------------------------------------------------------|-----------------------------------|------------------|-----------------|---------------------------------|---------------------------------------------------------------------------------------------------------------------------------------------------------|
| <a href="http://china-aibo.cn/ywpxgl/ywpxx/mjcbd/jspb/266795.shtml">http://china-aibo.cn/ywpxgl/ywpxx/mjcbd/jspb/266795.shtml</a> | Development assistance for health | Training course  | Web-Info        | Ministry of Commerce of the PRC | Project Description of Training Course on Health Care Technique of Traditional Chinese Medicine for Developing Countries                                |
| <a href="http://china-aibo.cn/ywpxgl/ywpxx/mjcbd/jspb/267019.shtml">http://china-aibo.cn/ywpxgl/ywpxx/mjcbd/jspb/267019.shtml</a> | Development assistance for health | Training course  | Web-Info        | Ministry of Commerce of the PRC | Project Description of Training Course on Pediatric Critical Care for Developing Countries                                                              |
| <a href="http://china-aibo.cn/ywpxgl/ywpxx/mjcbd/jspb/266914.shtml">http://china-aibo.cn/ywpxgl/ywpxx/mjcbd/jspb/266914.shtml</a> | Development assistance for health | Training course  | Web-Info        | Ministry of Commerce of the PRC | Project Description of Training Course on Common Gynecological and Pediatric Disease Treatment of Traditional Chinese Medicine for Developing Countries |
| <a href="http://china-aibo.cn/ywpxgl/ywpxx/mjcbd/jspb/268398.shtml">http://china-aibo.cn/ywpxgl/ywpxx/mjcbd/jspb/268398.shtml</a> | Development assistance for health | Training course  | Web-Info        | Ministry of Commerce of the PRC | Project Description of Seminar on Traditional Chinese Medicine Technique for Developing English-speaking Countries                                      |
| <a href="http://china-aibo.cn/ywpxgl/ywpxx/mjcbd/jspb/266983.shtml">http://china-aibo.cn/ywpxgl/ywpxx/mjcbd/jspb/266983.shtml</a> | Development assistance for health | Training course  | Web-Info        | Ministry of Commerce of the PRC | Project Description of Training Course for Rural Medical Workers of Francophone African Countries                                                       |
| <a href="http://china-aibo.cn/ywpxgl/ywpxx/mjcbd/jspb/267090.shtml">http://china-aibo.cn/ywpxgl/ywpxx/mjcbd/jspb/267090.shtml</a> | Development assistance for health | Training course  | Web-Info        | Ministry of Commerce of the PRC | Project Description of Training Course for Rural Medical Workers of African Countries                                                                   |
| <a href="http://china-aibo.cn/ywpxgl/ywpxx/mjcbd/jspb/267169.shtml">http://china-aibo.cn/ywpxgl/ywpxx/mjcbd/jspb/267169.shtml</a> | Development assistance for health | Training course  | Web-Info        | Ministry of Commerce of the PRC | Project Description of Training course on malaria diagnosis technique and equipment usage for anti-malaria centers in Africa (I)                        |
| <a href="http://china-aibo.cn/ywpxgl/ywpxx/mjcbd/jspb/267506.shtml">http://china-aibo.cn/ywpxgl/ywpxx/mjcbd/jspb/267506.shtml</a> | Development assistance for health | Training course  | Web-Info        | Ministry of Commerce of the PRC | Project Description of Training course on malaria diagnosis technique and equipment usage for                                                           |

| Source                                                                                                                                        | Topic                             | Sub-topic       | Category | Organization                    | Information title                                                                                                                            |
|-----------------------------------------------------------------------------------------------------------------------------------------------|-----------------------------------|-----------------|----------|---------------------------------|----------------------------------------------------------------------------------------------------------------------------------------------|
|                                                                                                                                               |                                   |                 |          |                                 | anti-malaria centers in Africa (II)                                                                                                          |
| <a href="http://china-aibo.cn/ywpxgl/ywpxxmjcbd/jspxb/267552.shtml">http://china-aibo.cn/ywpxgl/ywpxxmjcbd/jspxb/267552.shtml</a>             | Development assistance for health | Training course | Web-Info | Ministry of Commerce of the PRC | Project Description of Training Program on Nursing Techniques for Hospitals of Francophone Countries in Africa (II)                          |
| <a href="http://china-aibo.cn/ywpxgl/ywpxxmjcbd/jspxb/267550.shtml">http://china-aibo.cn/ywpxgl/ywpxxmjcbd/jspxb/267550.shtml</a>             | Development assistance for health | Training course | Web-Info | Ministry of Commerce of the PRC | Project Description of Training Program on Nursing Techniques for Hospitals of Francophone Countries in Africa ( I)                          |
| <a href="http://china-aibo.cn/ywpxgl/ywpxxmjcbd/jspxb/267564.shtml">http://china-aibo.cn/ywpxgl/ywpxxmjcbd/jspxb/267564.shtml</a>             | Development assistance for health | Training course | Web-Info | Ministry of Commerce of the PRC | Project Description of Training Course on Medical Techniques and Equipment Application for Hospitals of Francophone Countries in Africa (II) |
| <a href="http://china-aibo.cn/ywpxgl/ywpxxmjcbd/jspxb/267167.shtml">http://china-aibo.cn/ywpxgl/ywpxxmjcbd/jspxb/267167.shtml</a>             | Development assistance for health | Training course | Web-Info | Ministry of Commerce of the PRC | Project Description of Training Course on Medical Techniques and Equipment Application for Hospitals of Francophone Countries in Africa ( I) |
| <a href="http://china-aibo.east.net/ywpxgl/ywpxxmjcbd/jspxb/267169.shtml">http://china-aibo.east.net/ywpxgl/ywpxxmjcbd/jspxb/267169.shtml</a> | Development assistance for health | Training course | Web-Info | Ministry of Commerce of the PRC | Project Description of Training course on malaria diagnosis technique and equipment usage for anti-malaria centers in Africa (I)             |
| <a href="http://china-aibo.cn/ywpxgl/ywpxxmjcbd/jspxb/267504.shtml">http://china-aibo.cn/ywpxgl/ywpxxmjcbd/jspxb/267504.shtml</a>             | Development assistance for health | Training course | Web-Info | Ministry of Commerce of the PRC | Project Description of Training course on malaria diagnosis technique and equipment usage for anti-malaria centers in Africa(II)             |
| <a href="http://china-aibo.cn/ywpxgl/ywpxxmjcbd/jspxb/266925.shtml">http://china-aibo.cn/ywpxgl/ywpxxmjcbd/jspxb/266925.shtml</a>             | Development assistance for health | Training course | Web-Info | Ministry of Commerce of the PRC | Project Description of The First Training Program on Nursing Techniques for Hospitals of English-speaking Countries in Africa(I)             |

| <b>Source</b>                                                                                                                             | <b>Topic</b>                      | <b>Sub-topic</b> | <b>Category</b> | <b>Organization</b>             | <b>Information title</b>                                                                                                                                    |
|-------------------------------------------------------------------------------------------------------------------------------------------|-----------------------------------|------------------|-----------------|---------------------------------|-------------------------------------------------------------------------------------------------------------------------------------------------------------|
| <a href="http://china-aibo.cn/ywpxgl/ywpxxmjcbd/jspxb/267171.shtml">http://china-aibo.cn/ywpxgl/ywpxxmjcbd/jspxb/267171.shtml</a>         | Development assistance for health | Training course  | Web-Info        | Ministry of Commerce of the PRC | Project Description of The First Training Program on Nursing Techniques for Hospitals of English-speaking Countries in Africa(II)                           |
| <a href="http://china-aibo.cn/ywpxgl/ywpxxmjcbd/jspxb/267562.shtml">http://china-aibo.cn/ywpxgl/ywpxxmjcbd/jspxb/267562.shtml</a>         | Development assistance for health | Training course  | Web-Info        | Ministry of Commerce of the PRC | Project Description of Training Course on Medical Techniques and Equipment Application for Hospitals of English-speaking Countries in Africa (Project No.2) |
| <a href="http://www.china-aibo.cn/ywpxgl/ywpxxmjcbd/jspxb/266789.shtml">http://www.china-aibo.cn/ywpxgl/ywpxxmjcbd/jspxb/266789.shtml</a> | Development assistance for health | Training course  | Web-Info        | Ministry of Commerce of the PRC | Project Description of Training Course on Medical Techniques and Equipment Application for Hospitals of English-speaking Countries in Africa (Project No.1) |
| <a href="http://www.china-aibo.cn/ywpxgl/ywpxxmjcbd/jspxb/268646.shtml">http://www.china-aibo.cn/ywpxgl/ywpxxmjcbd/jspxb/268646.shtml</a> | Development assistance for health | Training course  | Web-Info        | Ministry of Commerce of the PRC | Project Description of Training Course on Pediatric Common Disease Prevention & Treatment for Developing Countries                                          |
| <a href="http://china-aibo.cn/ywpxgl/ywpxxmjcbd/jspxb/267397.shtml">http://china-aibo.cn/ywpxgl/ywpxxmjcbd/jspxb/267397.shtml</a>         | Development assistance for health | Training course  | Web-Info        | Ministry of Commerce of the PRC | Project Description of Training Course on Food Safety Inspection Technology for francophone Countries in Africa                                             |
| <a href="http://china-aibo.cn/ywpxgl/ywpxxmjcbd/jspxb/266933.shtml">http://china-aibo.cn/ywpxgl/ywpxxmjcbd/jspxb/266933.shtml</a>         | Development assistance for health | Training course  | Web-Info        | Ministry of Commerce of the PRC | Project Description of Training Course on Food Safety Inspection Technology for Developing Countries                                                        |
| <a href="http://china-aibo.cn/ywpxgl/ywpxxmjcbd/jspxb/266919.shtml">http://china-aibo.cn/ywpxgl/ywpxxmjcbd/jspxb/266919.shtml</a>         | Development assistance for health | Training course  | Web-Info        | Ministry of Commerce of the PRC | Project Description of Training Course on Prevention and Treatment of Infectious Diseases for Developing Countries                                          |

| <b>Source</b>                                                                                                                                 | <b>Topic</b>                      | <b>Sub-topic</b> | <b>Category</b> | <b>Organization</b>             | <b>Information title</b>                                                                                                                                              |
|-----------------------------------------------------------------------------------------------------------------------------------------------|-----------------------------------|------------------|-----------------|---------------------------------|-----------------------------------------------------------------------------------------------------------------------------------------------------------------------|
| <a href="http://china-aibo.cn/ywpxgl/ywpxxmjcbd/jspxb/266990.shtml">http://china-aibo.cn/ywpxgl/ywpxxmjcbd/jspxb/266990.shtml</a>             | Development assistance for health | Training course  | Web-Info        | Ministry of Commerce of the PRC | Project Description of Training Course on Food Safety Inspection Technology for Portuguese-speaking Countries                                                         |
| <a href="http://china-aibo.cn/ywpxgl/ywpxxmjcbd/jspxb/268265.shtml">http://china-aibo.cn/ywpxgl/ywpxxmjcbd/jspxb/268265.shtml</a>             | Development assistance for health | Training course  | Web-Info        | Ministry of Commerce of the PRC | Project Description of Training Program on Nursing Techniques for Portuguese-speaking Countries in Africa(I)                                                          |
| <a href="http://china-aibo.cn/ywpxgl/ywpxxmjcbd/jspxb/266929.shtml">http://china-aibo.cn/ywpxgl/ywpxxmjcbd/jspxb/266929.shtml</a>             | Development assistance for health | Training course  | Web-Info        | Ministry of Commerce of the PRC | Project Description of Training Course on Clinical Application of Chinese Acupuncture & Moxibustion as well as Tuina towards Developing Countries                     |
| <a href="http://china-aibo.east.net/ywpxgl/ywpxxmjcbd/jspxb/268743.shtml">http://china-aibo.east.net/ywpxgl/ywpxxmjcbd/jspxb/268743.shtml</a> | Development assistance for health | Training course  | Web-Info        | Ministry of Commerce of the PRC | Project Description of Training Course on Africa Malaria Control Technique                                                                                            |
| <a href="http://china-aibo.east.net/ywpxgl/ywpxxmjcbd/jspxb/269116.shtml">http://china-aibo.east.net/ywpxgl/ywpxxmjcbd/jspxb/269116.shtml</a> | Development assistance for health | Training course  | Web-Info        | Ministry of Commerce of the PRC | Project Description of Training Course on Clinical Application of Chinese Acupuncture & Moxibustion for Francophone Countries                                         |
| <a href="http://china-aibo.east.net/ywpxgl/ywpxxmjcbd/jspxb/269310.shtml">http://china-aibo.east.net/ywpxgl/ywpxxmjcbd/jspxb/269310.shtml</a> | Development assistance for health | Training course  | Web-Info        | Ministry of Commerce of the PRC | Project Description of Training Course on Clinical Application of Chinese Acupuncture & Moxibustion as well as Tuina towards Developing Countries                     |
| <a href="http://china-aibo.east.net/ywpxgl/ywpxxmjcbd/jspxb/269319.shtml">http://china-aibo.east.net/ywpxgl/ywpxxmjcbd/jspxb/269319.shtml</a> | Development assistance for health | Training course  | Web-Info        | Ministry of Commerce of the PRC | Project Description of Training Course on Medical Techniques and Equipment Application for Hospitals of Francophone Countries in Africa (30 Hospitals) (Project No.1) |
| <a href="http://china-aibo.east.net/ywpxgl/ywpxxmjcbd/jspxb/269340.shtml">http://china-aibo.east.net/ywpxgl/ywpxxmjcbd/jspxb/269340.shtml</a> | Development assistance for health | Training course  | Web-Info        | Ministry of Commerce of the PRC | Project Description of Training Course on Health Care Technique of Traditional Chinese Medicine for Developing Countries                                              |

| <b>Source</b>                                                                                                                                 | <b>Topic</b>                      | <b>Sub-topic</b> | <b>Category</b> | <b>Organization</b>             | <b>Information title</b>                                                                                                                                              |
|-----------------------------------------------------------------------------------------------------------------------------------------------|-----------------------------------|------------------|-----------------|---------------------------------|-----------------------------------------------------------------------------------------------------------------------------------------------------------------------|
| <a href="http://china-aibo.east.net/ywpxgl/ywpxxmjcbd/jspxb/269366.shtml">http://china-aibo.east.net/ywpxgl/ywpxxmjcbd/jspxb/269366.shtml</a> | Development assistance for health | Training course  | Web-Info        | Ministry of Commerce of the PRC | Project Description of Training Course on Food Safety Inspection Technology for Developing Countries                                                                  |
| <a href="http://china-aibo.east.net/ywpxgl/ywpxxmjcbd/jspxb/269425.shtml">http://china-aibo.east.net/ywpxgl/ywpxxmjcbd/jspxb/269425.shtml</a> | Development assistance for health | Training course  | Web-Info        | Ministry of Commerce of the PRC | Project Description of Training Program on Nursing Techniques for Hospitals of English-speaking Countries in Africa(I)                                                |
| <a href="http://china-aibo.east.net/ywpxgl/ywpxxmjcbd/jspxb/269427.shtml">http://china-aibo.east.net/ywpxgl/ywpxxmjcbd/jspxb/269427.shtml</a> | Development assistance for health | Training course  | Web-Info        | Ministry of Commerce of the PRC | Project Description of Training Course on Medical Techniques and Equipment Application for Hospitals of Francophone Countries in Africa (30 Hospitals) (Project No.2) |
| <a href="http://china-aibo.east.net/ywpxgl/ywpxxmjcbd/jspxb/269553.shtml">http://china-aibo.east.net/ywpxgl/ywpxxmjcbd/jspxb/269553.shtml</a> | Development assistance for health | Training course  | Web-Info        | Ministry of Commerce of the PRC | Project Description of Training Course on Critical Care of Neonates and children for Developing Countries                                                             |
| <a href="http://china-aibo.east.net/ywpxgl/ywpxxmjcbd/jspxb/269555.shtml">http://china-aibo.east.net/ywpxgl/ywpxxmjcbd/jspxb/269555.shtml</a> | Development assistance for health | Training course  | Web-Info        | Ministry of Commerce of the PRC | Project Description of Training Course on Prevention & Treatment of Pediatric Common Disease for Developing Countries                                                 |
| <a href="http://china-aibo.east.net/ywpxgl/ywpxxmjcbd/jspxb/269557.shtml">http://china-aibo.east.net/ywpxgl/ywpxxmjcbd/jspxb/269557.shtml</a> | Development assistance for health | Training course  | Web-Info        | Ministry of Commerce of the PRC | Project Description of Training Course on Pediatric Nursing Techniques for Developing Countries                                                                       |
| <a href="http://china-aibo.east.net/ywpxgl/ywpxxmjcbd/jspxb/269561.shtml">http://china-aibo.east.net/ywpxgl/ywpxxmjcbd/jspxb/269561.shtml</a> | Development assistance for health | Training course  | Web-Info        | Ministry of Commerce of the PRC | Project Description of Training Course on Prevention and Treatment of Infectious Diseases for Developing Countries                                                    |
| <a href="http://china-aibo.east.net/ywpxgl/ywpxxmjcbd/jspxb/269571.shtml">http://china-aibo.east.net/ywpxgl/ywpxxmjcbd/jspxb/269571.shtml</a> | Development assistance for health | Training course  | Web-Info        | Ministry of Commerce of the PRC | Project Description of Training Course on Medical Techniques and Equipment Application for Hospitals of English-speaking Countries in Africa (30                      |



| Source                                                                                                                                      | Topic                             | Sub-topic       | Category | Organization                    | Information title                                                                                                                                                     |
|---------------------------------------------------------------------------------------------------------------------------------------------|-----------------------------------|-----------------|----------|---------------------------------|-----------------------------------------------------------------------------------------------------------------------------------------------------------------------|
|                                                                                                                                             |                                   |                 |          |                                 | Hospitals) (Project No.1)                                                                                                                                             |
| <a href="http://china-aibo.east.net/ywpxgl/ywpxxmjcbd/jspb/269723.shtml">http://china-aibo.east.net/ywpxgl/ywpxxmjcbd/jspb/269723.shtml</a> | Development assistance for health | Training course | Web-Info | Ministry of Commerce of the PRC | Project Description of Nursing Technique Training Course for China-Aided Hospitals in English-speaking Countries in Africa                                            |
| <a href="http://china-aibo.east.net/ywpxgl/ywpxxmjcbd/jspb/269745.shtml">http://china-aibo.east.net/ywpxgl/ywpxxmjcbd/jspb/269745.shtml</a> | Development assistance for health | Training course | Web-Info | Ministry of Commerce of the PRC | Project Description of Training Course on malaria control for Francophone African countries                                                                           |
| <a href="http://china-aibo.east.net/ywpxgl/ywpxxmjcbd/jspb/269747.shtml">http://china-aibo.east.net/ywpxgl/ywpxxmjcbd/jspb/269747.shtml</a> | Development assistance for health | Training course | Web-Info | Ministry of Commerce of the PRC | Project Description of Training Course on malaria control for English-speaking African countries                                                                      |
| <a href="http://china-aibo.east.net/ywpxgl/ywpxxmjcbd/jspb/269794.shtml">http://china-aibo.east.net/ywpxgl/ywpxxmjcbd/jspb/269794.shtml</a> | Development assistance for health | Training course | Web-Info | Ministry of Commerce of the PRC | Project Description of for Training Course on Food Safety Inspection Technology Portuguese Countries                                                                  |
| <a href="http://china-aibo.east.net/ywpxgl/ywpxxmjcbd/jspb/269807.shtml">http://china-aibo.east.net/ywpxgl/ywpxxmjcbd/jspb/269807.shtml</a> | Development assistance for health | Training course | Web-Info | Ministry of Commerce of the PRC | Project Description of Training Course on Food Safety Inspection Technology for francophone Countries in Africa                                                       |
| <a href="http://china-aibo.east.net/ywpxgl/ywpxxmjcbd/jspb/270063.shtml">http://china-aibo.east.net/ywpxgl/ywpxxmjcbd/jspb/270063.shtml</a> | Development assistance for health | Training course | Web-Info | Ministry of Commerce of the PRC | Project Description of Seminar on prevention and treatment of Malaria and Tropical Disease for Portuguese-speaking countries                                          |
| <a href="http://china-aibo.east.net/ywpxgl/ywpxxmjcbd/jspb/270205.shtml">http://china-aibo.east.net/ywpxgl/ywpxxmjcbd/jspb/270205.shtml</a> | Development assistance for health | Training course | Web-Info | Ministry of Commerce of the PRC | Project Description of Training Course on Medical Techniques and Equipment Application for Hospitals of francophone Countries in Africa (30 Hospitals) (Project No.2) |

| <b>Source</b>                                                                                                                               | <b>Topic</b>                      | <b>Sub-topic</b> | <b>Category</b> | <b>Organization</b>                                       | <b>Information title</b>                                                                                                                                                   |
|---------------------------------------------------------------------------------------------------------------------------------------------|-----------------------------------|------------------|-----------------|-----------------------------------------------------------|----------------------------------------------------------------------------------------------------------------------------------------------------------------------------|
| <a href="http://china-aibo.east.net/ywpxgl/ywpxxmjcbdjspxb/270207.shtml">http://china-aibo.east.net/ywpxgl/ywpxxmjcbdjspxb/270207.shtml</a> | Development assistance for health | Training course  | Web-Info        | Ministry of Commerce of the PRC                           | Project Description of Training Course on Minimally Invasive Surgical Techniques for Developing Countries                                                                  |
| <a href="http://china-aibo.east.net/ywpxgl/ywpxxmjcbdjspxb/270209.shtml">http://china-aibo.east.net/ywpxgl/ywpxxmjcbdjspxb/270209.shtml</a> | Development assistance for health | Training course  | Web-Info        | Ministry of Commerce of the PRC                           | Project Description of Training Course on Medical Techniques and Equipment Application for Hospitals of English-speaking Countries in Africa (30 Hospitals) (Project No.2) |
| <a href="http://china-aibo.east.net/ywpxgl/ywpxxmjcbdjspxb/270301.shtml">http://china-aibo.east.net/ywpxgl/ywpxxmjcbdjspxb/270301.shtml</a> | Development assistance for health | Training course  | Web-Info        | Ministry of Commerce of the PRC                           | Project Description of Seminar on Nursing Technique for Portuguese-speaking Countries                                                                                      |
| <a href="http://china-aibo.east.net/ywpxgl/ywpxxmjcbdjspxb/270333.shtml">http://china-aibo.east.net/ywpxgl/ywpxxmjcbdjspxb/270333.shtml</a> | Development assistance for health | Training course  | Web-Info        | Ministry of Commerce of the PRC                           | Project Description of Training Course on Gynecological and Pediatric Disease Treatment of Traditional Chinese Medicine for Developing Countries                           |
| <a href="http://china-aibo.east.net/ywpxgl/ywpxxmjcbdjspxb/270689.shtml">http://china-aibo.east.net/ywpxgl/ywpxxmjcbdjspxb/270689.shtml</a> | Development assistance for health | Training course  | Web-Info        | Ministry of Commerce of the PRC                           | Project Description of Seminar on prevention and treatment of communicable diseases for Central Asian countries                                                            |
| <a href="http://china-aibo.east.net/ywpxgl/ywpxxmjcbdjspxb/271064.shtml">http://china-aibo.east.net/ywpxgl/ywpxxmjcbdjspxb/271064.shtml</a> | Development assistance for health | Training course  | Web-Info        | Ministry of Commerce of the PRC                           | Project Description of Training Course of Maternal Health Care & Nursing for Developing Countries                                                                          |
| <a href="http://www.docin.com/p-48770995.html&amp;endPro=true">http://www.docin.com/p-48770995.html&amp;endPro=true</a>                     | Development assistance for health | Training course  | Web-Info        | National Health and Family Planning Commission of the PRC | Multilateral foreign aid training project schedule in 2008                                                                                                                 |

| <b>Source</b>                                                                                                                                                                 | <b>Topic</b>                      | <b>Sub-topic</b>      | <b>Category</b> | <b>Organization</b>                                       | <b>Information title</b>                                                                                                                         |
|-------------------------------------------------------------------------------------------------------------------------------------------------------------------------------|-----------------------------------|-----------------------|-----------------|-----------------------------------------------------------|--------------------------------------------------------------------------------------------------------------------------------------------------|
| <a href="http://www.docin.com/p-631756633.html">http://www.docin.com/p-631756633.html</a>                                                                                     | Development assistance for health | Training course       | Web-Info        | National Health and Family Planning Commission of the PRC | Project Description of Workshop on Malaria Control for Officials of Developing Countries                                                         |
| <a href="http://www.jconline.cn/Contents/Channel_649/2010/0624/369533/content_369533.htm">http://www.jconline.cn/Contents/Channel_649/2010/0624/369533/content_369533.htm</a> | Development assistance for health | Training course       | Web-Info        | Press                                                     | Jincheng Mayor Wang Mao met with African health officials                                                                                        |
| <a href="http://news.cau.edu.cn/show.php?id=0000039804">http://news.cau.edu.cn/show.php?id=0000039804</a>                                                                     | Development assistance for health | Training course       | Web-Info        | University                                                | The closing ceremony for the seminar on food safety management for officials from developing countries was held in China Agricultural University |
| <a href="http://old.cacms.ac.cn/Html/guojijiaoliu/gjgongzuodongtai/100650387.html">http://old.cacms.ac.cn/Html/guojijiaoliu/gjgongzuodongtai/100650387.html</a>               | Development assistance for health | Training course       | Web-Info        | University                                                | Seminar on medical plants for officials from developing countries was held in Beijing                                                            |
| Institute for Health Metrics and Evaluation (IHME). Development Assistance for Health Country and Regional Recipient Level Database 1990-2010.                                | Governance and Policy             | Chinese funding to UN | Report          | Think tank                                                | Development Assistance for Health Country and Regional Recipient Level Database 1990-2010.                                                       |
| 53rd WORLD HEALTH ASSEMBLY A53/23 Human resources: annual report                                                                                                              | Governance and Policy             | Chinese staff         | Report          | WHO                                                       | 53rd WORLD HEALTH ASSEMBLY A53/23 Human resources: annual report                                                                                 |
| 54th WORLD HEALTH ASSEMBLY A54/28 Human resources: annual report                                                                                                              | Governance and Policy             | Chinese staff         | Report          | WHO                                                       | 54th WORLD HEALTH ASSEMBLY A54/28 Human resources: annual report                                                                                 |

| <b>Source</b>                                                    | <b>Topic</b>          | <b>Sub-topic</b> | <b>Category</b> | <b>Organization</b> | <b>Information title</b>                                         |
|------------------------------------------------------------------|-----------------------|------------------|-----------------|---------------------|------------------------------------------------------------------|
| 55th WORLD HEALTH ASSEMBLY A55/30 Human resources: annual report | Governance and Policy | Chinese staff    | Report          | WHO                 | 55th WORLD HEALTH ASSEMBLY A55/30 Human resources: annual report |
| 56th WORLD HEALTH ASSEMBLY A56/38 Human resources: annual report | Governance and Policy | Chinese staff    | Report          | WHO                 | 56th WORLD HEALTH ASSEMBLY A56/38 Human resources: annual report |
| 57th WORLD HEALTH ASSEMBLY A57/26 Human resources: annual report | Governance and Policy | Chinese staff    | Report          | WHO                 | 57th WORLD HEALTH ASSEMBLY A57/26 Human resources: annual report |
| 58th WORLD HEALTH ASSEMBLY A58/34 Human resources: annual report | Governance and Policy | Chinese staff    | Report          | WHO                 | 58th WORLD HEALTH ASSEMBLY A58/34 Human resources: annual report |
| 59th WORLD HEALTH ASSEMBLY A59/35 Human resources: annual report | Governance and Policy | Chinese staff    | Report          | WHO                 | 59th WORLD HEALTH ASSEMBLY A59/35 Human resources: annual report |
| 60th WORLD HEALTH ASSEMBLY A60/35 Human resources: annual report | Governance and Policy | Chinese staff    | Report          | WHO                 | 60th WORLD HEALTH ASSEMBLY A60/35 Human resources: annual report |
| 61st WORLD HEALTH ASSEMBLY A61/27 Human resources: annual report | Governance and Policy | Chinese staff    | Report          | WHO                 | 61st WORLD HEALTH ASSEMBLY A61/27 Human resources: annual report |
| 62nd WORLD HEALTH ASSEMBLY A62/34 Human resources: annual report | Governance and Policy | Chinese staff    | Report          | WHO                 | 62nd WORLD HEALTH ASSEMBLY A62/34 Human resources: annual report |

| Source                                                                                                                                                  | Topic                 | Sub-topic                                  | Category | Organization | Information title                                                                                                                                                                                                                              |
|---------------------------------------------------------------------------------------------------------------------------------------------------------|-----------------------|--------------------------------------------|----------|--------------|------------------------------------------------------------------------------------------------------------------------------------------------------------------------------------------------------------------------------------------------|
| 63rd WORLD HEALTH ASSEMBLY A63/40 Human resources: annual report                                                                                        | Governance and Policy | Chinese staff                              | Report   | WHO          | 63rd WORLD HEALTH ASSEMBLY A63/40 Human resources: annual report                                                                                                                                                                               |
| 64th WORLD HEALTH ASSEMBLY A64/36 Human resources: annual report                                                                                        | Governance and Policy | Chinese staff                              | Report   | WHO          | 64th WORLD HEALTH ASSEMBLY A64/36 Human resources: annual report                                                                                                                                                                               |
| 65th WORLD HEALTH ASSEMBLY A65/34 Human resources: annual report                                                                                        | Governance and Policy | Chinese staff                              | Report   | WHO          | 65th WORLD HEALTH ASSEMBLY A65/34 Human resources: annual report                                                                                                                                                                               |
| 66TH WORLD HEALTH ASSEMBLY A66/36 Human resources: annual report                                                                                        | Governance and Policy | Chinese staff                              | Report   | WHO          | 66TH WORLD HEALTH ASSEMBLY A66/36 Human resources: annual report                                                                                                                                                                               |
| OECD CRS                                                                                                                                                | Governance and Policy | Development assistance for health to China | Web-Info | OECD         | OECD countries reporting system                                                                                                                                                                                                                |
| <a href="http://www.nature.com/news/novel-bird-flu-kills-two-in-china-1.12728">http://www.nature.com/news/novel-bird-flu-kills-two-in-china-1.12728</a> | Health security       | SARS&H7N9 timeline                         | Web-Info | Press        | The novel bird flu kills two in China ---Scientists are estimating the pandemic potential of H7N9 flu virus.                                                                                                                                   |
| <a href="http://www.nature.com/news/the-fight-against-bird-flu-1.12850">http://www.nature.com/news/the-fight-against-bird-flu-1.12850</a>               | Health security       | SARS&H7N9 timeline                         | Web-Info | Press        | The fight against bird flu ---China's quick and well-organized response to the outbreak of H7N9 avian influenza reversed the country's bad reputation from its past weak response to communicable diseases. But improvements are still needed. |
| <a href="http://www.wpro.who.int/china/mediaCenter/releases/2013/20130523/">http://www.wpro.who.int/china/mediaCenter/releases/2013/20130523/</a>       | Health security       | SARS&H7N9 timeline                         | Web-Info | WHO          | The World Health Conference discussed the prevention and control of H7N9                                                                                                                                                                       |

| Source                                                                                                                                                                                                  | Topic           | Sub-topic          | Category | Organization                                              | Information title                                                                           |
|---------------------------------------------------------------------------------------------------------------------------------------------------------------------------------------------------------|-----------------|--------------------|----------|-----------------------------------------------------------|---------------------------------------------------------------------------------------------|
| en/index.html                                                                                                                                                                                           |                 |                    |          |                                                           |                                                                                             |
| <a href="http://www.wpro.who.int/china/mediaCenter/speeches/2013/20130424/en/">http://www.wpro.who.int/china/mediaCenter/speeches/2013/20130424/en/</a>                                                 | Health security | SARS&H7N9 timeline | Web-Info | WHO                                                       | Opening statement by Dr. Keiji Fukuda, WHO's Assistant Director-General for Health Security |
| <a href="http://www.wpro.who.int/china/mediaCenter/releases/2013/20130424/en/">http://www.wpro.who.int/china/mediaCenter/releases/2013/20130424/en/</a>                                                 | Health security | SARS&H7N9 timeline | Web-Info | WHO                                                       | China-WHO team completed their mission to examine the condition of H7N9 influenza in China  |
| <a href="http://www.who.int/csr/don/2003_05_27a/en/">http://www.who.int/csr/don/2003_05_27a/en/</a>                                                                                                     | Health security | SARS&H7N9 timeline | Web-Info | WHO                                                       | Update 67 - SARS resolution approved; situation in Taiwan                                   |
| <a href="http://www.who.int/csr/sars/archive/2003_04_29/en/">http://www.who.int/csr/sars/archive/2003_04_29/en/</a>                                                                                     | Health security | SARS&H7N9 timeline | Web-Info | WHO                                                       | Update 42 - Travel advice for Toronto; situation in China                                   |
| <a href="http://www.who.int/csr/don/2004_05_18a/en/">http://www.who.int/csr/don/2004_05_18a/en/</a>                                                                                                     | Health security | SARS&H7N9 timeline | Web-Info | WHO                                                       | China's latest SARS outbreak is under control, but concerns on biosafety remains – Update 7 |
| <a href="http://www.npfpc.gov.cn/news/central/201304/t20130405_404703.html">http://www.npfpc.gov.cn/news/central/201304/t20130405_404703.html</a>                                                       | Health security | SARS&H7N9 timeline | Web-Info | National Health and Family Planning Commission of the PRC | Frequently Asked Questions on human infection with influenza A(H7N9) virus                  |
| <a href="http://english.peopledaily.com.cn/90882/8213453.html">http://english.peopledaily.com.cn/90882/8213453.html</a>                                                                                 | Health security | SARS&H7N9 timeline | Web-Info | Press                                                     | Mainland, Taiwan fight H7N9 together by sharing virus strain H7N9                           |
| <a href="http://www.abc.net.au/news/2013-04-21/an-taiwan-assists-china-with-bird-flu-research/4642210">http://www.abc.net.au/news/2013-04-21/an-taiwan-assists-china-with-bird-flu-research/4642210</a> | Health security | SARS&H7N9 timeline | Web-Info | Press                                                     | Taiwan and China cooperate on bird flu research                                             |

| <b>Source</b>                                                                                                                                                                                                           | <b>Topic</b>    | <b>Sub-topic</b>   | <b>Category</b> | <b>Organization</b>                                       | <b>Information title</b>                                        |
|-------------------------------------------------------------------------------------------------------------------------------------------------------------------------------------------------------------------------|-----------------|--------------------|-----------------|-----------------------------------------------------------|-----------------------------------------------------------------|
| <a href="http://www.scmp.com/news/hong-kong/article/1154871/scientists-warn-more-serious-disease-threats-sars">http://www.scmp.com/news/hong-kong/article/1154871/scientists-warn-more-serious-disease-threats-sars</a> | Health security | SARS&H7N9 timeline | Web-Info        | Press                                                     | Scientists warn some diseases could be more dangerous than SARS |
| <a href="http://www.chinacdc.cn/jkzt/crb/rgrgzbxqlg_5295/">http://www.chinacdc.cn/jkzt/crb/rgrgzbxqlg_5295/</a>                                                                                                         | Health security | SARS&H7N9 timeline | Web-Info        | National Health and Family Planning Commission of the PRC | Influenza information (H7N9)                                    |
